# Supplementary material for: High and low latitude controls on Mid-Brunhes coccolithophore bloom and its implications on ocean carbon cycle
Source: Research Square preprint supplement (doi:10.21203/rs.3.rs-294199/v1), 2021-03-16
Supplement: Supplementary file 1 [file 80503110944a43408c538075.xlsx]

## Sheet: BioOpal AR
IODP U1343 Age(ka)	BiOpal AR (g cm-2 kyr-1)	ODP 882 Age(ka)	BiOpal AR (g cm-2 kyr-1)	ODP 1145 Age(ka)	BiOpal AR (g cm-2 kyr-1)	TT013-72 Age(ka)	BiOpal AR (g cm-2 kyr-1)	ODP 1091 Age(ka)	BiOpal AR (g cm-2 kyr-1)	PS58/254-1 Age (ka)	BiOpal AR (g cm-2 kyr-1)
5.11416	4.45455	4.5783	0.4	2.96333	0.289362	2.738	0.0197106	22	3.1878	7	0.04
6.39269	3.63636	9.1566	0.7684	20.4354	0.561702	5.106	0.0231553	44	3.93479	42.5	0.02
11.5068	2.72727	13.735	0.1111	26.9778	0.868085	7.203	0.0156948	66	2.90685	100.5	0.06
16.621	2.13636	18.313	0.1574	31.2112	0.595745	10.917	0.0144296	88	1.70354	160.5	0.07
19.1781	1.40909	23.655	0.1679	41.8715	0.680851	14.229	0.0095004	110	0.810764	217	0.23
29.4064	3.09091	28.233	0.1849	63.8078	0.578723	17.351	0.0077252	132	0.802321	271.5	0.07
34.5205	2.59091	32.048	0.167	67.6563	0.476596	20.479	0.007056	154	1.49042	318.5	0.21
44.7489	2.40909	36.016	0.189	89.7466	0.306383	23.852	0.0051851	176	2.61757	355.5	0.1
46.0274	2.72727	41.069	0.4138	104.14	0.340426	27.86	0.0076608	198	2.66261	399	0.15
52.4201	2.77273	46.486	0.4639	125.999	0.27234	33.219	0.0078735	220	2.21765	451	0.08
53.6986	3.40909	50.819	0.4239	140.431	0.289362	40.298	0.0081809	242	2.46998	505.5	0.13
56.2557	2.5	57.319	0.0916	158.096	0.476596	47.19	0.0062725	264	2.61741	548	0.1
57.5342	2.77273	62.736	0.0468	162.983	1.51489	50.152	0.007233	286	3.87799	592	0.11
67.7626	2.63636	67.538	0.9262	172.066	0.697872	55.163	0.0084981	308	5.4595	648.5	0.08
75.4338	1.77273	72.154	0.6202	182.533	0.868085	57.37	0.0033876	330	4.36605	694	0.08
79.2694	4.13636	75.808	0.5753	198.043	0.408511	61.599	0.0052128	352	2.81685	736.5	0.03
83.105	2.31818	86.02	0.4376	212.936	0.221277	70.963	0.009436	374	4.89101	775.5	0.12
92.0548	3.09091	92.143	0.9618	241.685	0.306383	77.179	0.0091834	396	3.92351	802	0.02
95.8904	4.22727	96.655	1.4538	255.616	0.544681	94.3	0.011568	418	2.50001	840	0.03
97.1689	3.04545	99.138	1.5208	274.012	0.408511	103.88	0.0113378	440	3.36509	883	0.13
99.726	4.13636	105.97	0.1229	288.444	0.425532	112.369	0.0192384	462	3.94804	945	0.04
101.005	2.77273	115.46	0.3129	310.534	0.255319	119.365	0.0070397	484	2.62799	1030	0.03
104.84	1.72727	128.15	0.2253	328.776	0.187234	128.433	0.0192816	506	1.77979
111.233	2.81818	132.89	0.2797	343.207	0.204255	134.427	0.0198465	528	2.90678
113.79	1.31818	139.26	0.2623	346.171	0.493617	141.844	0.0136533	550	5.5204
116.347	2.31818	144.57	0.2566	353.098	0.629787	146.849	0.0116998	572	7.23187
118.904	2	149.88	0.2488	360.91	0.374468	155.423	0.0096918	594	4.89459
126.575	5.72727	156.34	0.3976	375.766	0.204255	159.252	0.0068244	616	1.54519
134.247	1	159.34	0.4025	390.313	0.170213	162.745	0.009273	638	0.77592
138.082	2.09091	161.41	0.2724	408.17	0.27234	165.989	0.0066963	660	0.759946
141.918	1.95455	163.9	0.3055	422.64	0.27234	169.244	0.00562	682	0.794164
147.032	2.31818	166.38	0.407	447.732	0.374468	177.098	0.0105264	704	2.01099
150.868	0.909091	169.28	0.2126	470.092	0.0851064	182.511	0.0095506	726	4.98602
153.425	2.5	171.66	0.1913	495.338	0.119149	190.028	0.0049581	748	5.6641
155.982	2.13636	174.45	0.5856	527.934	0.102128	199.554	0.004983	770	4.73378
158.539	2.31818	176.72	0.1519	560.608	0.0510638	207.091	0.0025443	792	3.0189
167.489	1.5	179.88	0.1791	600.324	0.0851064	213.777	0.0038301	814	2.96646
176.438	1.54545	186.34	0.3213	614.525	0.204255	219.779	0.0026334	836	2.3512
180.274	1.90909	195.15	0.2355	658.244	0.0680851	231.205	0.0028897	858	2.82436
187.945	1.77273	203.66	0.0924	687.146	0.0851064	238.024	0.004165	880	2.90379
194.338	2.77273	208.94	0.2349	755.918	0.0680851	246.245	0.0043746	902	2.23706
196.895	1.86364	212.54	0.4336	781.203	0.0851064	253.286	0.0035456	924	3.18022
200.731	2.5	222.71	0.4267	810.143	0.0851064	258.539	0.005174	946	3.03077
205.845	2.13636	229.8	0.6061	824.575	0.102128	263.02	0.0085956	968	3.48052
208.402	2.31818	237.13	0.4379	838.892	0.170213	271.959	0.0166516	990	3.50124
214.795	1.81818	243.18	0.1421	846.242	0.119149	274.527	0.024102	1012	4.39004
217.352	1.36364	248.87	0.9856	860.713	0.119149	277.352	0.0096064	1034	4.18945
222.466	2.63636	254.2	0.4171	868.063	0.0680851	284.077	0.007568	1056	5.05427
228.858	1.68182	259.36	0.3586	875.183	0.119149	292.488	0.0067962	1078	3.7509
233.973	0.590909	264.69	0.1909	893.271	0.119149	302.712	0.0063336	1100	3.19282
239.087	3.59091	268.36	0.0982	900.583	0.0851064	319.982	0.0092456	1122	3.00558
245.479	1.90909	274.48	0.1401	911.282	0.153191	325.185	0.0102175	1144	3.12202
248.037	2.72727	278.56	0.2302	922.288	0.0851064	334.056	0.0043152	1166	3.56368
251.872	3.09091	284.33	0.5538	929.523	0.0851064	338.516	0.00205	1188	4.29168
259.543	2.18182	289.43	0.2572	936.797	0.0680851	343.464	0.0070892	1210	3.59777
262.1	1.13636	293.22	0.1252	947.496	0.13617	349.188	0.00409	1232	4.26787
265.936	1.95455	301.04	0.8292	958.425	0.102128	355.661	0.0045804	1254	4.31842
276.164	2.13636	307.35	0.2852	965.468	0.187234	362.176	0.0054938	1276	3.32619
277.443	2.95455	313.8	1.0897	983.594	0.170213	368.194	0.0084664	1298	3.5952
281.279	2.77273	321.83	0.1636	1001.84	0.102128	379.546	0.0151341	1320	3.11707
282.557	3.22727	327.44	0.5658	1034.39	0.102128	391.2	0.0175674	1342	3.38896
288.95	1.59091	336.65	0.1334	1059.76	0.0851064	395.86	0.030992	1364	3.44955
295.342	1.04545	341.35	0.1616	1081.5	0.0680851	404.349	0.01695	1386	3.77524
303.014	4.22727	346.05	0.3221	1110.4	0.0851064	410.886	0.0070356	1408	4.05121
304.292	2.72727	350.92	0.4162	1132.07	0.102128	417.867	0.00435	1430	4.52467
310.685	2.09091	354.32	0.3571	1142.84	0.13617	429.883	0.0040919	1452	4.21411
317.078	3.68182	357.66	0.3359	1153.77	0.102128	434.405	0.0016842	1474	4.30001
320.913	2.81818	364	0.2198	1171.75	0.153191	438.268	0.001456	1496	3.68402
324.749	4.04545	372.21	0.1531	1186.33	0.102128	444.882	0.001204	1518	3.97269
328.584	2.81818	381.16	0.1497	1211.66	0.102128	451.198	0.0014079	1540	4.35888
331.142	3.13636	389.9	0.2041	1240.67	0.0680851	458.488	0.0018228	1562	3.6751
334.977	2.27273	395.29	0.1264	1247.22	0.374468	462.702	0.0019278	1584	3.5118
341.37	3.22727	408.33	0.2229	1262.38	0.0680851	467.044	0.0038824	1606	3.00269
345.205	0.772727	413.97	0.1139	1284.08	0.0680851	471.364	0.0072917	1628	3.12286
354.155	2.09091	426.17	0.1744	1305.79	0.0680851	475.802	0.0128933	1650	3.36703
368.219	2.22727	430.95	0.15	1323.8	0.102128	488.347	0.0045612	1672	3.61491
373.333	3.68182	439.9	0.3202	1342.04	0.0340426	504.386	0.0030944	1694	3.80655
378.447	3.68182	469.8	0.1103	1370.94	0.0510638	518.577	0.004599	1716	3.73226
384.84	4	476.14	0.8605	1381.84	0.0340426	522.813	0.00308	1738	3.46947
401.461	3.63636	484.22	0.928	1392.61	0.0680851	526.901	0.0029001	1760	3.46174
410.411	2.86364	488.33	0.7813			558.998	0.0043471	1782	2.59799
419.361	3.90909	492.58	0.6255			569.521	0.0030504	1804	1.98513
423.196	1.68182	496.22	1.5035			573.396	0.003015	1826	1.95163
430.868	3.5	497.33	1.9189			577.404	0.004948	1848	2.33329
441.096	2.95455	502.22	1.4668			581.114	0.0028522	1870	2.22454
448.767	1.86364	506.11	0.3042			584.954	0.0014953	1892	1.87243
451.324	2.63636	517.55	0.1429			594.186	0.002821	1914	1.882
458.995	1.77273	529.02	0.2972			604.871	0.0038304	1936	1.86913
466.667	2.27273	559.7	0.09			611.256	0.0044299	1958	1.75548
473.059	3.90909	576.54	0.1634			619.696	0.0042417	1980	1.62735
479.452	2	590.83	0.1521			640.845	0.0022414	2002	1.75384
484.566	3.27273	598.5	0.134			648.716	0.0014094	2024	1.8089
487.123	2.13636	608.6	0.12			655.137	0.0013128	2046	1.75298
492.237	4	612.98	0.2742			660.464	0.0058227	2068	1.67452
497.352	3.31818	617.14	0.2727			664.678	0.0014256	2090	1.62266
505.023	2.81818	621.47	0.8064			668.517	0.0012925	2112	1.61944
510.137	3.86364	625.63	0.6992			672.286	0.0024398	2134	1.24467
516.53	2.77273	629.61	0.5251			676.132	0.0016344	2156	1.51524
529.315	2.36364	634.98	0.1338			680.199	0.001976	2178	1.62694
535.708	3.13636	640.83	0.4571			690.597	0.0028812	2200	2.05617
543.379	2.36364	645.2	0.2507			697.393	0.0027125	2222	2.20578
545.936	2.18182	652.94	0.221			705.198	0.0016694	2244	1.89955
549.772	2.5	657.82	0.191			720.155	0.0018816	2266	1.59974
554.886	1.95455	661.81	0.2264			733.217	0.001185	2288	1.72468
563.836	2.13636	667.6	0.3224			742.743	0.0007887	2310	1.64726
568.95	1.86364	672.4	0.1528			755.289	0.0013787	2332	1.56934
571.507	2.86364	677.36	0.1383			763.858	0.002951	2354	1.67105
576.621	1.81818	682.06	0.6798			775.323	0.0046134	2376	1.5386
584.292	3	685.7	0.2053			782.776	0.0012468	2398	1.32203
590.685	1.59091	691.01	1.2181			786.358	0.0023805	2420	1.40049
595.799	2.09091	695.4	0.8857			790.196	0.0034692	2442	1.67363
611.142	1.40909	699.95	0.6305			800.868	0.0038532	2464	1.71234
623.927	2.09091	707.99	1.0428			837.321	0.0121582	2486	1.57103
632.877	2.36364	712.54	1.2015			847.666	0.020972	2508	1.36457
643.105	1.45455	717.69	0.7365			861.044	0.0059799	2530	1.13579
652.055	1.54545	722.24	0.2084			922.938	0.0036727	2552	1.64968
658.447	2.13636	729.94	0.2554			929.133	0.0056472	2574	1.03146
667.397	2	736.33	0.315			967.486	0.006864	2596	0.54518
680.183	2.40909	746.33	0.275			987.049	0.004359	2618	0.425372
763.288	3.36364	754.11	0.0911			1004.76	0.0020888	2640	0.438872
769.68	1.77273	761.95	0.2454			1034.9	0.0017364	2662	0.470706
773.516	3.5	769.34	0.3344			1045.27	0.0045969	2684	0.502874
801.644	2.54545	775.01	0.1893					2706	0.534233
813.151	2.95455	781.52	1.3417					2728	0.564781
823.379	2.95455	786	0.2847					2750	0.59452
824.658	1.90909	800.22	0.0569					2772	0.606176
828.493	3.27273	812.71	0.1358					2794	0.568744
834.886	2.54545	817.98	0.1864					2816	0.57467
841.279	5.22727	824.62	0.2919					2838	0.685012
851.507	1.27273	833.5	0.2613					2860	0.767394
859.178	4.22727	838.85	0.2422					2882	0.809528
864.292	2.04545	847.15	0.4002					2904	0.799947
866.849	2.31818	850.07	0.2409					2926	0.783422
871.963	0.772727	855	0.113					2948	0.760985
882.192	2.13636	859.8	0.0815					2970	0.647666
901.37	0.636364	864.8	0.1115					2992	0.441786
911.598	1.86364	870.8	0.1241					3014	0.379349
919.269	2	875.05	0.1165					3036	0.39956
921.826	0.636364	879.92	0.6776					3058	0.42658
925.662	0.818182	883.08	1.0447					3080	0.44914
937.169	4.5	890.17	0.4477					3102	0.468975
944.84	2.95455	896.35	0.3493					3124	0.485506
948.676	4.22727	902.44	0.1396					3146	0.498733
955.068	3.40909	908.13	1.1944					3168	0.507968
965.297	2.40909	912.84	0.1627					3190	0.481158
970.411	1.22727	919.9	1.0436					3212	0.426942
979.361	6.09091	925.76	0.7206					3234	0.391475
983.196	1.36364	931.67	1.0366					3256	0.360937
989.589	1.31818	937.19	0.1754					3278	0.322368
997.26	4.27273	941.76	0.1903					3300	0.270773
		950.65	2.2694					3322	0.209662
		954.41	1.588					3344	0.190046
		958.77	0.0546					3366	0.18863
		964.84	0.2859					3388	0.188699
		973.94	1.0125					3410	0.188746
		981.66	0.4714					3432	0.18877
		994.08	0.6878					3454	0.18877
		997.93	0.2972					3476	0.187993
		1003.8	0.3507					3498	0.187003
		1010.3	0.3584					3520	0.186777
		1017	0.1662					3542	0.187318
		1022.3	0.1017					3564	0.187856
		1028.8	0.3247					3586	0.188391
		1034.4	0.3917					3608	0.188925
		1040.8	0.7009					3630	0.18907
		1046.2	0.5846					3652	0.189982
		1051.6	0.7293					3674	0.190785
		1054.5	0.3822					3696	0.197039
		1054.7	0.0372					3718	0.205514
		1060.2	0.1873					3740	0.213695
		1064.8	0.6138					3762	0.222886
		1068.8	0.305					3784	0.231784
		1075	0.4077					3806	0.210536
		1080	0.3251					3828	0.185896
		1087.6	0.1541
		1096	0.3016
		1102.8	0.272
		1118.6	0.3495
		1126.3	0.4764
		1140.9	0.1348
		1156.3	0.1824
		1168.7	0.0941
		1180.2	0.2137
		1186.4	0.6802
		1191.4	0.8079
		1198.9	0.7237
		1205.1	0.641
		1210.4	0.7144
		1215.3	0.5985
		1219.2	0.6414
		1225.4	0.8391
		1231.9	0.4262
		1238.9	0.5626
		1251	0.806
		1257.8	0.8094
		1260.8	0.4592
		1264.6	0.5909
		1267.8	0.4769
		1270.3	0.2959
		1274.7	0.2065
		1281	0.5031
		1284	0.614
		1289.7	0.1206
		1298	0.3089
		1305.7	0.131
		1315.2	0.2236
		1322.8	0.137
		1330.9	0.1809
		1338.1	0.1509
		1343.3	0.8162
		1350.5	0.1225
		1357.8	0.1547
		1385.6	0.0406
		1392.8	0.1937
		1401.2	0.1184
		1408.1	0.0989
		1415.1	1.0125
		1422	0.0683
		1429.2	0.1253
		1441.5	0.1754
		1452.4	0.15
		1460.3	0.1693
		1468.6	0.4133
		1475.4	0.3
		1487.7	0.1449
		1500.5	0.1667
		1509.3	0.1127
		1516.8	0.6811
		1522.5	0.9449
		1531.3	0.9728
		1538.5	0.8204
		1540.7	1.0336
		1545	1.2932
		1548.5	0.9451
		1551.7	0.5318
		1555.3	0.3372
		1558.8	0.2876
		1562.2	0.417
		1565.6	0.432
		1572.9	0.373
		1580.7	0.4527
		1587	0.705
		1588.6	0.3515
		1594.5	0.1948
		1599.6	0.2452
		1604.7	0.4098
		1609	0.3042
		1612.4	0.2717
		1617.2	0.2575
		1621.8	0.2544
		1627.5	0.5393
		1635	0.3115
		1649.5	0.2475
		1655.4	0.254
		1661.5	0.1327
		1667.1	0.2378
		1672	0.1286
		1677.6	0.351
		1680.5	0.6255
		1686.6	0.2382
		1690.7	0.4924
		1694.1	0.3584
		1696.4	1.3321
		1710.1	0.1329
		1719.9	0.3407
		1727.5	0.0481
		1733.9	0.1228
		1738.9	0.2034
		1740.7	0.1479
		1742.3	0.1257
		1745.8	0.4979
		1747.5	0.0792
		1749.3	0.0844
		1751.4	0.0955
		1752.6	0.1614
		1754.5	0.2658
		1756.1	0.3409
		1758.7	0.4724
		1762.1	0.2306
		1768.4	0.0866
		1775.3	0.1267
		1781.6	0.0262
		1794.8	0.0421
		1800.3	0.071
		1806.2	0.062
		1825.9	0.0772
		1843.6	0.0468
		1873.6	0.0327
		1917.8	0.027
		1934.8	0.1036
		1947.7	0.2035
		1955.5	0.1591
		1962	0.4106
		1968.5	0.1905
		1974.6	0.1303
		1981.4	0.1334
		1991.1	0.1926
		1999.2	0.1182
		2017.2	0.1361
		2029.2	0.0977
		2042.5	0.0807
		2054.2	0.1833
		2063.2	0.3767
		2066.7	0.1785
		2078.2	0.1284
		2092.8	0.1029
		2107	0.1559
		2121.2	0.0862
		2143.4	0.157
		2158.4	0.1788
		2173.2	0.1782
		2173.5	0.5172
		2176.9	0.4648
		2183.7	0.22
		2187.1	0.2846
		2194.2	0.7093
		2197.8	0.4133
		2198.7	1.084
		2205	0.8795
		2210.4	0.9308
		2214.4	0.9613
		2220	0.8591
		2224.2	1.1864
		2228.7	0.554
		2233.1	0.9606
		2236	1.1918
		2238.9	1.2735
		2241.9	1.374
		2244.8	0.59
		2246.4	0.6953
		2250.8	0.3132
		2255.9	0.1405
		2267.5	0.3077
		2272.4	0.4566
		2279.4	0.5829
		2286.1	0.188
		2289.6	0.2983
		2299.8	0.6955
		2309.9	0.2704
		2323.2	0.2476
		2344	0.1141
		2361.8	0.1456
		2376	0.1588
		2380.8	0.3655
		2384.9	0.3566
		2387.5	0.32
		2391.1	0.5575
		2396.2	0.4108
		2401.2	0.3772
		2406.4	0.2501
		2410.5	0.1963
		2418.6	0.2668
		2426.2	0.2962
		2430.3	0.1695
		2438.4	0.1125
		2446.4	0.1099
		2462.3	0.2515
		2468.6	0.4634
		2476.5	0.2774
		2484.4	0.1724
		2488.2	0.0976
		2500.9	0.1389
		2516.4	0.2564
		2528.3	0.1636
		2541.8	0.3855
		2551.3	0.3267
		2560.8	0.3457
		2570.2	0.383
		2577.7	0.3706
		2587.5	0.5311
		2597.4	0.5185
		2608.2	0.4201
		2619	0.2483
		2626.2	0.4997
		2632.3	1.0789
		2637.3	0.8276
		2642.4	1.1726
		2647.4	0.7364
		2652.7	0.4301
		2665.2	0.4783
		2673.5	0.582
		2679	0.7134
		2684.4	0.7663
		2688.8	0.8826
		2695.4	0.538
		2701	0.5765
		2706.7	0.8754
		2712.3	0.9198
		2717	0.9929
		2723.8	0.8676
		2729.2	1.5614
		2734.3	2.6103
		2737	2.4895
		2739.7	2.8485
		2742.3	3.0936
		2745.2	2.7439
		2747.8	2.4774
		2749.8	2.9612
		2752.9	2.8538
		2755.9	2.3224
		2759.1	2.2743
		2762.3	2.1122
		2764.8	2.4758
		2768.5	2.4415
		2771.5	2.0634
		2774.6	2.0803
		2777.8	2.1349
		2780.3	2.3664
		2784	2.3202
		2786.4	3.4343
		2788.6	3.7567
		2790.7	3.7868
		2792.4	4.2591
		2795	3.6729
		2797.1	3.0004
		2799.3	3.8213
		2801.4	3.5093
		2803.1	3.7272
		2803.7	3.6256
		2805.6	3.3226
		2807.7	3.0978
		2809.9	2.7622
		2812.5	2.8445
		2814.6	3.3774
		2817	3.386
		2819.3	3.2537
		2822.5	2.3154
		2824.1	2.9553
		2826.5	2.7625
		2828.8	2.9452
		2831.2	3.0764
		2833.6	2.7669
		2833.6	3.0934
		2836	3.0683
		2838.7	2.8445
		2841.3	3.0965
		2843.7	2.773
		2846.4	2.4207
		2848.5	2.9882
		2851.8	2.9461
		2854.5	2.6584
		2857.1	2.821
		2859.8	2.7309
		2861.9	2.7263
		2865.1	3.1103
		2867.8	3.3246
		2870.5	2.9417
		2873.2	2.5278
		2875.3	2.7076
		2878.5	3.3757
		2880.8	3.0663
		2883.1	3.7912
		2885.3	3.0802
		2887.2	3.2054
		2890	3.2293
		2892.3	2.9025
		2894.6	2.8028
		2896.9	3.0313
		2898.7	3.0905
		2901.4	2.2314
		2903.7	2.6892
		2905.7	3.944
		2907.5	4.3631
		2909.2	4.2694
		2910.9	5.0975
		2912.7	5.4217
		2914.4	4.8906
		2916.2	3.0394
		2917.8	4.5229
		2920.4	5.5741
		2921.3	3.8182
		2923.1	4.92
		2924.3	4.287
		2926.1	4.7461
		2927.5	3.9677
		2929.7	4.8839
		2931.4	4.5843
		2933.2	4.3746
		2935	5.007
		2936.5	4.526
		2938.5	4.462
		2940.1	4.0445
		2941.8	4.8356
		2943.5	4.6785
		2944.8	5.6838
		2946.8	5.3088
		2948.4	5.9852
		2950.2	4.7448
		2951.8	3.9794
		2953.1	4.2848
		2955.2	4.1269
		2956.7	4.8535
		2958.5	4.9651
		2960.2	5.2198
		2961.5	4.9761
		2963.5	3.8255
		2965	5.1801
		2966.7	4.3182
		2968.3	4.6172
		2969.9	4.8169
		2971.5	5.3201
		2973.1	4.7061
		2974.7	5.3621
		2976.3	5.2107
		2977.7	4.5694
		2979.3	4.9262
		2981.4	3.9297
		2983.3	6.3974
		2985.2	3.9118
		2987.1	3.6703
		2988.6	4.4177
		2990.9	3.6368
		2992.8	3.4507
		2994.7	4.1614
		2996.6	4.204
		2998.2	3.7506
		3000.5	3.81
		3002.4	4.0248
		3004.3	4.4412
		3006.2	3.8542
		3007.7	4.81
		3009.8	4.1003
		3011.7	4.1573
		3013.5	3.714
		3015.3	4.513
		3016.7	5.6354
		3018.9	3.7996
		3020.7	4.9688
		3022.6	4.3557
		3024.4	3.9596
		3025.8	5.7249
		3027.4	3.5188
		3030.8	3.6665
		3032.4	3.8633
		3035.7	3.8762
		3037.3	3.7512
		3038.9	4.7059
		3040.2	4.8213
		3042.2	5.0207
		3043.8	4.6777
		3045.5	4.4044
		3047.2	4.4307
		3048.5	4.5374
		3050.5	4.7099
		3052.1	4.4378
		3053.8	4.0285
		3055.7	3.9502
		3057.1	4.038
		3059.3	5.2143
		3061.2	3.8058
		3063.1	3.2937
		3064.9	3.806
		3066.4	4.2818
		3068.6	4.5806
		3070.4	4.3668
		3072.3	3.8349
		3074.1	3.6935
		3076	2.247
		3079.4	2.4853
		3082.3	2.5494
		3085.2	3.057
		3088.1	2.6456
		3091	2.1839
		3093.8	2.5446
		3096.7	2.5919
		3102.3	2.6074
		3105.1	2.3016
		3108	2.2071
		3113.7	2.3569
		3119.3	2.3649
		3122.2	2.2171
		3125	2.8895
		3126.5	3.1004
		3129.4	2.7687
		3132.2	3.2493
		3135.1	2.7522
		3137.3	3.2506
		3140.8	2.0206
		3143.6	3.2217
		3146.4	3.7794
		3148.5	4.2756
		3150.1	4.1248
		3152.6	3.0975
		3154.7	3.3126
		3156.7	4.0147
		3158.8	3.6534
		3163	2.7982
		3165	4.0627
		3167.1	2.9468
		3170.1	2.5794
		3172.5	2.5048
		3176.1	2.5736
		3179.2	2.3523
		3182.2	2.3749
		3185.1	2.6195
		3187.5	1.4663
		3191.1	2.2678
		3194.1	2.484
		3196.9	2.3725
		3198.1	4.1166
		3199.8	3.7952
		3201.5	3.9295
		3203.2	3.4348
		3205.6	4.1067
		3209	4.0752
		3214.1	3.811
		3217.5	4.5269
		3222.5	4.301
		3225.9	3.0021
		3230.9	3.0401
		3235.4	3.2254
		3242.1	2.9216
		3246.6	2.5453
		3253	2.7527
		3256.8	3.1116
		3260.3	3.5276
		3262.1	3.3122
		3264	3.3475
		3265.9	3.8831
		3267.8	3.2376
		3269.6	3.0508
		3273.3	3.049
		3278.9	3.0319
		3281.4	2.4727
		3288.7	1.7834
		3293.7	1.7035
		3301.2	1.8761
		3306.7	1.9855
		3313.9	1.9485
		3318.6	2.3779
		3323.9	3.4172
		3327.4	2.5178
		3332.6	3.1638
		3336.1	3.2709
		3341.5	4.2251
		3343.2	4.1297
		3344.9	3.6581
		3349.4	2.1701
		3356.2	1.5123
		3363.5	1.3803
		3375.3	1.2501
		3383.2	1.1389
		3393.1	2.3433
		3397.3	2.625
		3403.4	2.1512
		3407.6	3.1354
		3414.2	1.7693
		3419	2.9263
		3426.2	1.4707
		3431	2.2106
		3433.2	2.5424
		3435.4	2.1754
		3438.1	1.9223
		3440.3	2.7716
		3444.7	1.9792
		3448	1.299
		3450.8	2.3987
		3453.6	1.4184
		3456.3	1.2782
		3458.6	1.5741
		3461.9	1.1295
		3464.5	2.1703
		3466.6	1.9185
		3468.7	1.8862
		3470.4	2.3509
		3472.9	2.4794
		3474.9	2.866
		3477.1	2.636
		3479.2	1.8542
		3480.9	2.7313
		3483.5	2.5172
		3485.6	2.3732
		3487.8	2.6184
		3489.9	1.9402
		3491.6	2.2475
		3493.8	3.469
		3494.2	2.5114
		3496.3	3.0851
		3498.5	3.8978
		3500.6	4.2685
		3502.3	4.3276
		3506.8	4.3453
		3508.7	4.1061
		3510.4	4.0114
		3511.7	4.2622
		3513.5	4.2558
		3517.1	4.3582
		3519.2	4.5093
		3521	4.641
		3522.9	4.1936
		3526.7	3.3186
		3529.2	3.1743
		3531.8	3.3149
		3534.2	3.3401
		3536.8	3.3966
		3539.4	2.9513
		3541.9	3.9884
		3544.5	3.3464
		3546.9	3.0577
		3549.3	3.4194
		3551.5	3.8827
		3553.8	2.7427
		3557.9	3.8539
		3560.1	3.8763
		3562.3	3.5662
		3564	3.4678
		3566.5	3.4099
		3568.7	3.2118
		3570.9	3.2501
		3573	3.4344
		3574.7	3.266
		3577.3	2.9996
		3579.2	6.9976
		3580.9	5.9791
		3583.8	5.6987
		3585.8	6.1089
		3587.4	4.4353
		3589	4.5716
		3590.7	5.4024
		3592	5.5428
		3594	6.4544
		3595.5	5.8737
		3597.2	5.1994
		3598.8	5.0813
		3600.1	4.9402
		3602.1	5.1077
		3603.6	4.3829
		3605.1	5.6415
		3606.5	5.5865
		3607.6	5.1591
		3609.2	4.436
		3610.7	5.936
		3612.1	5.4806
		3613.5	5.2937
		3616.4	5.5552
		3617.8	4.8538
		3620.5	5.5608
		3621.9	5.3748
		3623	6.2824
		3624.8	5.621
		3626.4	4.8004
		3628	5.1607
		3629.6	4.9107
		3630.9	4.8449
		3632.9	4.8013
		3634.4	5.868
		3636	5.3748
		3638.9	4.501
		3642.4	4.1158
		3644.6	3.6249
		3647.2	3.0367
		3652.3	3.8234
		3654.9	3.6403
		3657.5	2.7254
		3659.6	3.3525
		3660	2.7987
		3662.1	3.6113
		3665.2	2.9312
		3672.8	3.2318
		3678	3.0435
		3680.1	4.6352
		3681.9	3.6369
		3683.6	3.6923
		3685.1	3.6806
		3687.2	4.7716
		3689.4	5.2147
		3691.6	4.7723
		3693.5	4.9898
		3695.6	4.5057
		3697.7	4.631
		3699.8	4.5454
		3703.2	4.4249
		3703.8	4.7562
		3705.8	4.3392
		3707.9	4.5854
		3710.5	4.0649
		3712	4.4561
		3714.1	4.4159
		3717.7	3.4254
		3719.4	2.9286
		3721.2	3.102
		3724	2.8671
		3726.4	4.1115
		3731.2	2.5835
		3740.7	2.9313
		3742.9	2.9204
		3744.8	3.402
		3749.8	2.7868
		3754.4	3.6648
		3756.3	3.961
		3759	3.5815
		3766.4	2.9138
		3768.9	2.5582
		3772.5	2.3603
		3778.5	2.9363
		3781.5	2.6723
		3784.5	2.5176
		3790.6	2.7677
		3793.3	2.7876
		3796	3.1075
		3801.1	3.0186
		3803.8	2.9361
		3806.5	3.2175
		3810.7	1.7981
		3815.7	1.9177
		3823.1	1.5702
		3839.6	1.9797
		3850.5	1.6301
		3857	0.3768
		3861.3	1.7509
		3867.7	1.706
		3872.1	2.0691
		3876.1	3.3688
		3880.2	1.5767
		3885	1.4487
		3893.5	2.0229
		3897.8	3.1751
		3903.5	3.5288
		3907.3	3.3968
		3916.9	2.5395
		3922.7	3.3706
		3926.4	3.6662
		3932.2	3.6071
		3936.1	3.5646
		3942	3.41
		3944	3.5577
		3946	3.3909
		3948.1	3.7268
		3950.1	3.429
		3954.2	3.8537
		3956.3	3.655
		3963.1	2.7372
		3970.5	2.4401
		3976.3	1.6968
		3984.9	2.8028
		3990.7	2.7577
		4005	2.3051
		4013.7	2.4941
		4019.5	2.8713
		4028.1	2.4952
		4033.9	3.205
		4042.3	3.1186
		4048.1	3.7326
		4051	3.3203
		4054	3.2637
		4060	3.3516
		4065.6	3.1902
		4068.5	3.4608
		4071.4	2.9562
		4074.5	2.9435
		4077.3	3.1967
		4080.2	2.9703
		4083	2.8228
		4090.8	3.0213
		4090.8	3.0422
		4098.6	2.7024
		4110.7	2.409
		4117.2	2.7464
		4120.8	2.9313
		4128.6	3.0981
		4132.2	2.9773
		4135.2	2.8825
		4138.2	2.726
		4143.6	2.6237
		4153.2	2.548
		4158.6	2.932
		4162.1	2.112
		4165.1	2.6969
		4170.7	2.2861
		4177.1	2.8355
		4180.1	2.7261
		4183.1	2.2179
		4188.1	2.8934
		4193.5	2.2952
		4197.1	2.7072
		4205.9	2.3052
		4211.7	2.0448
		4220.4	1.9578
		4222.7	1.9791
		4226.2	2.1403
		4240.7	2.3389
		4249.4	2.1576
		4255.2	2.2341
		4263.9	2.3019
		4269.7	1.8699
		4277.9	1.7829
		4312.2	1.5998
		4314.5	1.9247
		4317.5	2.1287
		4323.9	2.3455
		4334.5	3.6165
		4338.7	3.2846
		4340.9	3.6104
		4343	3.1441
		4345.8	3.0831
		4350.1	3.4319
		4355.5	3.21
		4358.9	2.6024
		4361	2.6623
		4369.6	3.4206
		4373.2	3.3582
		4374.2	3.3327
		4378.4	3.9981
		4389.1	3.8245
		4395.1	3.1484
		4399.7	3.7721
		4406.1	2.5846
		4412.5	3.1349
		4422.4	3.0106
		4426.6	3.4822
		4430.9	2.522
		4437.3	3.0716
		4447.9	3.2011
		4452.1	3.9
		4458.5	3.41
		4462.8	3.5329
		4469.1	3.7753
		4473.4	3.7121
		4494.6	2.601
		4499.5	3.039
		4514	3.259
		4528.6	3.1325
		4543.1	3.0228
		4549	3.0669
		4557.7	3.5193
		4563.5	3.8034
		4578.1	3.029
		4591.7	2.5071
		4597.5	2.3417
		4606.2	2.787
		4612	2.0189
		4620.8	2.6825
		4627.8	1.7358
		4639.6	1.8717
		4647.4	1.3549
		4659.2	1.9081
		4667	1.6964
		4678.8	1.786
		4686.6	1.6468
		4697.1	1.9917
		4701	2.2266
		4704.9	1.9476
		4712.8	1.6124
		4716.7	1.9727
		4720.6	2.565
		4724.5	2.2959
		4727.7	1.8615
		4732.4	1.943
		4736.3	2.0828
		4740.2	2.2796
		4744.1	0.8853
		4752	2.0414
		4755.9	2.1241
		4759.8	1.3389
		4763.7	2.37
		4766.9	1.8612
		4771.6	2.5463
		4779.4	1.9404
		4783.5	2.134
		4786.9	2.2824
		4791.9	2.8153
		4796.2	2.1999
		4804.6	2.6075
		4808	2.3708
		4813	1.9789
		4817.2	2.3888
		4821.4	1.8978
		4824.2	1.782
		4828.4	1.5565
		4832.7	2.1489
		4836	2.2446
		4841.1	2.4792
		4845.3	1.859
		4849.5	2.0832
		4853.7	1.9597
		4857.1	2.038
		4862.1	2.1786
		4866.3	1.9015
		4870.6	1.6411
		4874.8	1.9327
		4878.2	1.7334
		4884	1.7992
		4888.8	1.636
		4893.6	2.0095
		4898.4	1.8489
		4902.3	1.823
		4908.1	2.0048
		4912.9	1.7803
		4917.8	1.8734
		4922.6	1.9212
		4926.5	1.9247
		4932.2	1.6825
		4937.1	1.955
		4941.9	1.477
		4946.7	1.3949
		4950.6	1.5801
		4956.4	1.4398
		4961.2	1.4609
		4966.1	0.6616
		4973.9	1.9192
		4979.1	1.7507
		4983	1.9595
		4994.5	1.6118
		4999.4	1.6757
		5004.6	0.9321
		5008.9	1.6661
		5015	1.1042
		5020.2	0.9741
		5025.1	1.1426
		5030.3	0.5775
		5034.5	1.4655
		5040.7	1.2691
		5045.8	1.4688
		5050.8	1.5884
		5055.9	1.0011
		5060.2	0.994
		5066.4	1.106
		5076.5	2.2332
		5085.9	0.9844
		5092.1	1.3857
		5097.2	0.8769
		5103.4	0.7364
		5107.5	0.9537
		5111.6	1.7799
		5117.8	0.985
		5123.4	1.084
		5131.5	1.0345
		5136.6	0.8958
		5141.7	1.1105
		5145.9	1.7513
		5152	2.0676
		5157.2	1.4044
		5167.4	1.4765
		5171.5	1.9628
		5177.7	1.7934
		5183.2	2.0431
		5188	1.732
		5193.1	1.7612
		5203.4	1.645
		5208.5	2.1203
		5213.7	1.4656
		5219	1.4408
		5229.1	1.9132
		5234.8	1.8702
		5241.3	2.2365
		5247.8	1.5997
		5253	1.9446
		5260.8	1.6979
		5267.3	1.7859
		5273.8	1.6571
		5280.3	1.6726
		5285.5	1.8122
		5293.3	2.0475
		5299.8	1.7039
		5317.1	2.2468
		5323.6	2.0751
		5328.8	1.5501
		5336.6	1.4929
		5343.1	2.0127
		5349.6	2.4969
		5356.1	1.7384
		5361.3	1.7814
		5369.1	1.4512
		5375.6	2.0173
		5382.1	1.8228
		5388.6	1.6829
		5393.8	1.7826
		5401.6	1.7975
		5408.1	1.8548
		5414.6	2.0808
		5421.1	1.7583
		5426.3	1.6929
		5434.1	2.1765
		5440.6	1.6208
		5447.1	1.8236
		5466.6	1.7204
		5473.1	1.5829
		5524.2	1.147
		5544.1	1.2561
		5552	1.4304
		5564	1.2429
		5571.9	1.7341
		5603.7	1.6371
		5611.6	1.6155
		5623.6	1.259
		5650.1	1.0008
		5669.9	0.8993
		5677.9	0.7288
		5689.8	0.721
		5697.7	0.4467
		5705.7	0.6876
		5729.5	1.0832
		5737.5	0.7605
		5749.4	1.1885
		5757.4	0.5495
		5775.9	0.954
		5783.8	0.598
		5795.8	0.9863
		5815.6	1.0499
		5835.5	0.8978
		5843.5	0.8797
		5855.4	1.2383
		5863.3	0.7899
		5876.2	0.821
		5887.3	1.4224

## Sheet: BioOpal %
IODP U1341 Age (ka)	Opal %	MD01-2414 Age (ka)	Opal %	SO202_1_39-3 Age (ka)	Opal %	ODP 798 Age (ka)	Opal %	IODP U1338 Age (ka)	Opal %	ODP 664 Age (ka)	Opal %	ODP 663 Age (ka)	Opal %	ODP 1084 Age (ka)	Opal %	MD2-2588 Age (ka)	Opal %	ODP 1090 Age (ka)	Opal %	ODP 704 Age (ka)	Opal %
1.2	33.4228	3.695	56	5.86	22.83	0.0596026	17.6	2.33803	2.40357	4.67747	1.5	2.2519	2.7	92	3.55	1.566	1.47	4.6	2	17.7273	5.01187
4.8	21.745	3.9225	40	9.07	18.34	1.49007	19.8	3.25479	1.35798	6.82843	4.2	4.3111	3.2	97	13.01	3	1.17	9.4	1.9	88.6364	63.0957
8.4	14.8993	4.15	37	12.28	15.94	2.98013	23.1	4.17433	1.38266	9.51713	3.8	6.8851	4.7	103	5.17	4.887	1.72	15.3	4	159.545	25.1189
13.2	21.3423	4.3775	36	24.5	20.72	4.4702	22.7	5.06535	1.56968	12.7436	2.7	9.9739	4.9	108	16.73	6.89	1.16	21	4.8	202.797	25.1189
14.4	12.8859	4.605	40	33.9	21.62	5.96026	19.4	5.68726	1.46467	17.5832	2.1	12.2905	7.6	113	6.02	8.267	1.09	34.75	2.4	214.492	125.893
16.8	8.85906	4.8325	31	38.24	18.85	7.45033	16.8	6.31261	2.28408	20.8097	1.9	14.6071	5.7	118	23.69	9.876	1.54	40.8462	1.8	230.085	19.9526
26.4	13.2886	5.06	36	42.57	21.94	9	18.5	6.94194	1.66825	22.9606	2.2	17.6959	5.7	124	10.54	11.789	1.64	49.3077	2.8	245.678	63.0957
27.6	10.8725	5.2875	44	47.26	21.49	10.4305	11	7.57576	1.52403	25.6493	2.6	19.7551	5.7	129	16.78	13.603	1.49	57.7692	3.5	249.576	63.0957
30	16.1074	5.515	0	51.95	17.33	11.9205	12.9	8.21461	2.6077	28.8758	2.1	22.3291	6.3	136	6.36	15.321	1.15	64.4	3.4	261.271	125.893
31.2	12.8859	5.7425	35	56.64	19.99	13.4106	7.1	8.859	3.32851	33.7154	2.6	25.4179	6.6	141	5.86	16.102	1.09	69.1429	2.3	288.559	100
32.4	16.9128	5.97	38	61.33	15.94	14.9007	6.5	9.50946	1.83293	35.5975	2.5	27.7345	7.4	146	5.81	17.766	1.47	73.7143	2.2	304.153	39.8107
33.6	24.5638	6.1975	33	66.02	12.74	16.3907	5.1	10.1621	1.40323	39.0928	1.6	30.0511	6.7	152	6.05	19.545	1.91	80	2.5	319.746	79.4328
34.8	13.2886	6.425	35	69.41	15.11	17.9404	4.3	10.8088	1.15545	45.008	2	33.1399	5.9	157	7.97	21.299	1.71	93.7	1.9	331.441	50.1187
38.4	30.2013	6.6525	0	72.67	17.45	19.2881	3.4	11.4629	1.51927	47.1589	2.5	35.1991	5.5	162	7.06	22.098	2.09	100.6	2.7	347.034	31.6228
40.8	14.4966	6.88	37	75.92	16.44	19.4237	4.3	12.125	1.40742	49.8476	2.8	37.0009	5.5	167	5.02	25.267	1.99	106.6	1.7	362.627	31.6228
43.2	28.5906	7.1075	43	79.17	19.2	20.9831	4.7	12.7955	1.39989	53.0741	4	40.8619	4.5	169	6.17	27.549	2.36	112.2	2.1	370.424	281.838
46.8	22.1477	7.335	24	82.42	18.24	22.6102	4.4	13.475	1.47801	57.9137	4	42.9211	4.2	174	14.26	28.456	1.44	117.4	1.5	378.22	63.0957
49.2	20.9396	7.5625	33	85.67	13.82	22.8814	6.9	14.164	1.28872	61.1402	2.7	45.4951	4.5	179	3.31	29.123	1.87	122.286	1.9	389.915	1.99526
50.4	23.7584	7.79	10	92.3	19	24.2373	5.5	14.863	1.32236	63.2911	1.7	48.5839	6.3	185	7.68	30.622	1.63	125.143	1.6	405.508	1.99526
51.6	14.4966	8.4725	25	99.15	20.09	26	5	15.5852	1.15591	65.9798	2.8	50.9005	5.2	190	8.28	32.159	1.88	127.714	1.7	413.305	6.30957
54	20.1342	8.7	11	106.43	19.24	26	7	16.3216	1.61807	69.2063	1.5	53.2171	5.7	195	7.54	35.9	1.12	130.857	2.6	417.203	1.99526
55.2	17.3154	8.7933	5	110.78	23.03	27.6949	7.5	17.0699	1.79413	74.0459	2.5	56.3059	5.1	200	4.94	39.835	1.26	134.4	3.9	428.305	79.4328
60	25.3691	8.8867	22	115.12	21	30.678	10.4	17.8304	1.78696	75.928	1.4	58.3651	3.1	202	10.2	41.7	1.18	138.314	2.3	434.915	3.98107
61.2	12.8859	8.98	13	119.46	20.51	32.7797	7.8	18.6038	1.84775	79.4233	1.7	60.9391	4.4	213	11.74	43.567	1.04	141.457	3	441.525	15.8489
64.8	10.4698	9.0733	0	123.8	23.55	32.7797	8.4	19.3905	2.34588	81.3054	1.9	64.0279	4.8	223	5.81	45.354	0.99	144.6	2.2	446.483	125.893
67.2	12.8859	9.1667	15	128.14	18.71	34.4068	9.2	20.2169	2.69759	85.3385	1.3	66.3445	5.3	228	8.28	47.139	1.27	146.8	2.9	453.093	177.828
69.6	33.8255	9.26	5	132.48	15.57	36.1695	8.4	21.1415	1.9845	87.4894	1.7	68.6611	6.1	240	12.62	48.899	1.7	148.686	2.8	459.703	125.893
72	17.7181	10.5148	13	136.83	16.09	36.1695	9.3	22.083	2.05639	90.1781	1.6	71.7499	6.7	245	19.1	50.639	0.99	151.1	1.8	466.314	158.489
74.4	33.4228	11.4111	1	140.76	13.93	37.8644	11	23.0421	2.17886	93.4046	1.8	73.8091	6.9	250	18.98	52.471	1	154.6	2	471.271	199.526
78	16.5101	12.3074	8	143.06	15.28	39.2203	11.4	24.0193	2.25103	98.2442	1.9	79.4719	7.5	256	15.84	54.178	0.82	163.545	1.7	477.881	100
79.2	25.3691	13.2037	4	145.36	16.94	41.2542	8.8	25.0171	2.25837	101.471	1.7	81.5311	6.4	262	4.37	55.999	1.16	170.636	3.2	484.492	125.893
81.6	28.5906	14.1	0	147.66	17.14	43.0952	8.1	26.1545	2.51752	103.622	1.4	84.1051	7.4	272	7.18	57.788	1.02	176.25	2.8	491.102	199.526
82.8	26.9799	14.6125	29	150.2	15.69	43.0952	8.2	27.3142	2.08906	106.31	2	87.1939	4.7	276	4.39	59.432	1.44	181.912	3.6	509.28	56.2341
85.2	45.1007	15.125	19	152.27	17.87	44.9728	6	28.4968	2.77196	109.537	3.7	89.5105	3.1	287	4.03	61.299	1.38	185.735	3.1	515.89	50.1187
86.4	13.6913	15.6375	0	154.57	14.53	47.0068	5.3	29.7031	2.53792	114.376	2.5	91.8271	3	297	5.42	62.85	1.33	189.559	2.9	520.847	199.526
88.8	31.0067	16.15	0	156.88	12.99	47.0068	6.9	31.1049	1.69107	116.259	2.6	94.9159	5.4	304	6.55	64.199	1.75	193.65	1.9	527.458	39.8107
91.2	24.5638	16.6625	0	159.21	13.7	48.9626	4.6	32.5908	3.24311	119.754	3.3	96.9751	3	314	6.48	65.5	2.01	200.15	3.1	534.068	199.526
92.4	35.0336	17.175	0	161.53	13.29	50.6837	5.4	34.107	4.39642	121.636	2.9	99.5491	3.2	324	3.86	66.847	1.86	206.8	2.1	540.678	177.828
94.8	26.9799	17.6875	0	163.86	14.69	52.8741	6	35.6341	3.32887	125.669	3.3	102.638	3.5	335	2.88	68.122	1.14	214.8	2.7	545.636	39.8107
97.2	37.8523	18.2	0	166.19	15.7	54.517	9.3	37.1646	2.81097	127.82	2.7	104.954	3.3	342	12.43	69.463	1.34	222.8	1.5	577.034	3.98107
99.6	36.6443	19.5186	0	168.51	16.37	54.8299	7.3	38.7267	2.86108	130.509	3.2	107.271	2.8	352	4.75	70.832	1.07	227.5	2.8	578.686	50.1187
100.8	37.8523	20.8372	0	170.84	14.61	56.7075	8.1	40.3332	2.46862	133.735	3.3	110.36	2.8	362	5.06	72.169	1.14	230	2.1	585.297	19.9526
103.2	29.396	22.1559	0	173.4	14.12	58.6633	8.5	42.0218	1.92736	138.575	3.2	112.419	3.1	372	6.82	73.519	1.38	233.8	2.3	591.907	10
104.4	36.6443	23.4745	5	175.49	13.89	58.7415	6	43.7455	2.72422	141.801	2.5	114.221	3.5	382	7.1	74.789	0.68	238.36	2.4	598.517	15.8489
105.6	33.0201	25.3205	1	177.82	12.95	60.619	7.8	45.525	1.99439	143.952	2.9	123.23	6.6	392	5.02	76.108	1.37	241.96	2.7	610.085	19.9526
108	12.0805	26.6391	0	180.14	12.57	62.3401	10.1	47.3917	1.5592	146.641	3.6	125.804	8.4	402	5.21	77.434	0.96	245.56	2.6	616.695	31.6228
109.2	22.5503	27.9578	0	182.47	14.07	64.6871	12.5	49.2974	1.96669	149.867	1.7	127.863	7.3	407	2.66	78.758	0.85	248.6	2.8	622.59	25.1189
111.6	33.0201	29.2764	2	184.79	12.3	66.3081	7.5	51.3612	2.50702	154.707	2	130.437	7.1	417	3.5	80.123	1.13	251.5	2.2	626.475	31.6228
115.2	15.302	30.595	15	187.12	15.62	66.4389	10.8	53.5363	2.25143	156.589	1.9	133.011	3.5	427	3.55	81.389	0.96	255.4	3.2	631.655	35.4813
117.6	25.7718	31.9136	14	190.93	14.35	67.8778	9.9	55.8767	1.10888	160.084	2.9	135.585	3.5	437	4.51	82.675	0.93	261.818	2.9	636.835	25.1189
123.6	43.8926	35.8902	2	195.72	18.36	69.513	8.6	58.5024	2.88334	161.966	2.2	138.674	3.7	447	3.43	84	0.83	265.909	4.7	642.014	25.1189
127.2	20.1342	37.2641	0	200.52	19.89	69.5784	7.7	61.2321	0.760847	165.999	1.5	140.733	3.7	457	4.7	85.309	1.23	270.409	4.2	645.899	25.1189
128.4	15.7047	38.638	10	205.31	15.64	71.1481	10.3	64.079	0.770534	168.15	2.8	143.307	4.3	468	8.26	86.876	0.79	273.682	5.4	651.079	19.9526
133.2	12.8859	40.0119	11	210.11	12.87	72.6524	7.9	66.3024	0.702972	170.839	2.2	146.396	4.5	472	3.5	88.653	0.83	277.773	3.7	656.259	19.9526
135.6	18.1208	41.3858	18	214.9	20.43	74.4838	8.2	68.243	0.50928	174.066	1.3	148.712	5	483	9.65	90.422	0.79	280.129	0.3	661.439	19.9526
138	14.4966	42.7597	7	219.7	11.23	76.1189	6.7	70.2127	0.691716	178.905	2.5	151.029	6	494	4.1	92.145	0.76	282.161	3	665.324	63.0957
144	16.9128	44.1336	10	224.49	13.46	76.5768	9.4	72.2111	1.21267	182.132	2	154.118	5.6	505	2.76	93.956	0.88	283.968	2	670.504	199.526
146.4	13.2886	45.5075	21	229.28	15.21	77.6886	8.3	83.2827	0.661977	184.283	2.5	156.177	4.6	516	6.77	95.734	0.87	286.667	1.8	675.683	10
151.2	17.7181	46.8814	26	234.08	14.4	79.3238	6.2	85.8762	0.543415	186.971	2.3	161.84	6.1	527	4.66	97.456	0.75	292.667	2.4	680.863	15.8489
154.8	17.7181	48.2553	19	238.87	18.84	79.3892	6.3	88.6709	0.567833	190.198	2.1	163.899	3.3	538	6.74	99.231	0.79	296.6	2.2	684.748	28.1838
156	30.604	49.6292	6	243.67	21.33	79.7816	8.6	90.8967	0.240103	195.037	1.9	166.473	2.1	542	12.98	101	0.73	302.4	2.5	689.928	35.4813
159.6	14.8993	51.0032	12	248.46	14.22	80.9589	7.7	92.6061	0.607115	196.92	1.9	169.562	3.8	553	5.34	102.812	0.91	306.4	2	695.108	50.1187
165.6	27.3826	52.3771	0	252.56	15.23	83.1827	4.5	94.323	0.201774	200.415	2.1	171.879	4	564	6.3	104.512	0.86	313.8	2.8	700.288	19.9526
172.8	12.0805	53.751	5	256.64	17.17	86.1259	9.2	96.6631	0.604727	206.33	3	174.195	3.7	575	4.08	106.299	1.01	324.2	2.4	704.173	39.8107
176.4	10.0671	55.1249	10	260.36	25.91	87.8919	18.2	99.4097	1.15359	208.481	2.2	177.284	3	586	9.37	108.05	1.13	329.2	3	709.353	63.0957
180	11.6779	56.4988	2	264.07	12.18	88.0881	16.7	102.681	1.23977	211.17	1.8	179.343	3.2	597	11.04	110	1.31	331.4	3.2	710	50.1187
183.6	20.5369	57.8727	3	267.78	13.12	89.4616	17.7	106.188	1.37993	214.396	1.4	181.917	3.1	606	6.43	111.567	1.35	335.4	2.1	722.302	31.6228
192	14.4966	59.2466	0	271.49	7	91.1622	19.3	109.885	1.11009	219.236	2	185.006	4.4	609	2.86	113.987	1.28	339.4	1.6	722.82	50.1187
201.6	19.3289	60.6205	0	275.2	9.48	91.3584	21.2	113.335	0.948086	222.462	2.2	187.322	5.5	619	3.36	115.1	1.13	341.595	1.9	727.482	39.8107
219.6	27.7852	61.9944	0	278.91	12.08	96.0022	10.9	116.57	1.21434	224.613	1.5	189.639	6.2	625	8.38	116.789	1.03	342.07	2.6	730.072	35.4813
225.6	38.255	63.3683	0	282.62	10.77	97.7027	8.4	119.61	1.00186	227.302	3.1	192.728	5.6	633	9.41	118.356	1.03	342.546	3.7	735.252	79.4328
229.2	37.8523	64.7422	0	286.33	10.64	97.9643	10.5	122.125	0.864723	230.528	1.4	194.787	4.5	641	11.92	120.006	1.13	343.497	2.7	736.547	39.8107
235.2	36.2416	66.1161	8	290.04	13.57	99.3378	9.2	124.558	1.39097	235.368	2	196.589	4.5	649	5.02	121.678	0.94	344.686	3.7	738.489	39.8107
242.4	39.8658	67.49	2	293.76	14.32	100.973	5.9	126.528	0.986348	237.25	1.8	200.45	3.2	657	15.34	123.2	1.02	345.876	2.2	741.727	50.1187
248.4	31.4094	68.8639	0	297.48	14.47	101.169	7.8	128.393	0.888714	240.745	2	202.509	5.3	658	23.01	124.856	1.02	347.065	2.5	742.374	50.1187
253.2	9.66443	70.2378	28	301.21	14.87	105.682	3.9	130.891	0.786058	242.627	2.1	205.083	4.5	666	26.23	126.489	1.1	348.254	1.6	749.496	63.0957
256.8	15.302	71.6937	36	304.93	14.83	107.514	3.3	132.55	0.833989	246.66	2	208.172	4.5	674	11.54	128.1	1.3	349.324	2.6	754.676	50.1187
261.6	16.9128	73.5066	1	308.66	13.58	107.841	5.8	134.204	1.35426	248.811	3.2	210.488	4.9	682	21.98	129.687	1.29	350.038	3.1	759.856	44.6684
264	33.0201	75.3195	5	312.39	12.69	109.083	5.3	135.864	0.822535	251.5	3	212.805	4.6	690	22.38	131.387	0.94	351.227	2.8	761.151	50.1187
267.6	33.4228	77.1324	18	316.12	15.55	110.784	4.4	137.527	4.26388	254.727	3.5	215.894	3.6	698	25.56	132.967	0.58	352.416	2.6	765.036	50.1187
271.2	31.4094	78.9453	4	319.85	12.46	110.98	6.2	139.186	1.11605	260.104	3.1	217.953	4.3	706	8.18	134.589	0.59	353.605	2.9	768.921	50.1187
273.6	33.8255	80.7582	0	323.58	20.79	111.176	9	140.967	1.55931	262.255	0.8	220.527	4.7	709	25.61	136.187	0.57	354.795	3	774.101	251.189
282	36.6443	82.5711	22	326.93	18.12	121.772	5.4	142.866	1.30399	264.944	1.1	223.616	6.1	717	15.24	137.769	0.82	355.389	2	779.281	25.1189
284.4	35.0336	84.384	21	331.04	14.62	122.818	7.1	144.759	1.13735	268.17	1.5	225.933	7.2	725	8.33	139.378	0.87	356.103	2.3	780.576	39.8107
289.2	40.2685	86.1969	12	334.76	9.94	123.865	7.5	146.821	1.40814	273.01	1.9	228.249	5.6	733	5.57	140.979	1.13	357.173	2.6	781.871	63.0957
294	34.2282	88.0099	27	338.49	11.62	125.369	5.6	148.901	1.30431	276.236	1.3	231.338	6.5	741	15.41	142.569	0.88	358.362	2	784.46	19.9526
297.6	14.4966	89.8228	5	342.22	10.17	126.481	5.7	150.961	1.10881	278.387	1.3	233.397	8.2	749	15.54	144.187	1.23	359.551	2	788.345	19.9526
301.2	23.7584	91.5593	0	345.19	15.72	145.122	12.7	152.999	1.66274	281.076	1.7	235.199	7.5	757	6.65	145.789	1.11	360.146	1.9	793.525	251.189
306	26.1745	92.7576	16	347.84	10.52	146.691	14.2	155.03	1.1135	284.302	2.7	239.06	6.4	759	12.22	147.39	1.18	361.335	2.3	798.705	56.2341
307.2	31.4094	93.9558	27	350.49	8.76	146.757	11.9	157.032	0.801748	289.142	2.7	241.119	4.1	767	19.32	148.965	1.03	362.524	1.6	800	63.0957
309.6	31.0067	95.154	29	353.14	10.71	148.326	13	159.027	1.28331	291.024	2.5	243.693	3.5	784	4.75	150.267	1.11	364.2	1.5	803.885	125.893
318	30.2013	96.3523	14	355.79	12.62	149.962	9.8	160.965	1.16429	294.519	3	246.782	3.7	792	19.73	152.267	0.84	366.2	1.9	807.77	125.893
321.6	25.3691	97.5505	34	359.71	9.16	150.027	9.6	162.848	1.26159	296.401	2.1	249.098	3.3	800	22.63	153.856	1.34	368.2	1.7	812.95	79.4328
325.2	25.3691	98.7487	24	364.92	13.65	150.419	5.9	164.724	1.50042	300.434	2	251.415	2.8	808	28.75	155.465	1.7	370.8	1.7	818.129	125.893
328.8	14.4966	99.947	28	370.12	14.42	153.166	7.4	166.442	1.80022	302.585	1.8	254.504	3.6	810	14.5	157.389	1.19	376	1.7	819.424	158.489
332.4	11.6779	101.145	11	375.33	12.49	154.867	7	168.128	0.830052	305.274	1.2	256.563	2.9	818	20.54	158.6	1.02	376.131	2.8	832.374	31.6228
338.4	25.7718	102.343	19	380.53	18.88	156.502	5.3	169.805	1.187	308.501	2.3	259.137	3.8	826	29.89	160.36	1	378.18	1	836.259	31.6228
342	14.094	103.542	15	385.73	16.56	156.568	4.4	171.402	0.96368	313.34	1.4	262.226	3.7	832	25.32	161.7	1.23	378.4	2.1	841.439	31.6228
345.6	22.1477	104.74	26	390.94	19.83	158.203	7.5	172.981	0.860507	316.567	0.6	264.543	4	850	16.23	163.45	1.34	380.433	2.2	844.029	79.4328
350.4	25.3691	105.938	7	396.14	18.68	159.772	5	174.553	1.06185	318.718	2.1	266.859	5.5	855	13.92	164.8	1.45	382.276	1.5	846.619	100
354	41.4765	107.754	28	401.35	16	159.838	4.5	176.025	0.806502	321.406	2.2	269.948	3.2	861	7.01	166.35	1.36	382.525	1.3	850.504	39.8107
358.8	42.6846	109.651	13	406.55	16.86	161.408	8.4	177.452	0.804848	324.633	1.3	272.007	2.3	874	24.96	168	1.39	384.325	1.9	855.683	31.6228
361.2	49.9329	111.548	20	411.76	21.54	162.977	13.2	178.872	0.646708	329.472	1.3	273.809	2.7	885	22.22	169.5	1.45	386.373	1.9	860.863	12.5893
366	18.9262	113.444	39	414.36	12.34	163.762	3.1	180.307	0.207213	331.355	1.2	277.67	5.1	890	26.62	171.1	1.56	386.725	0.7	866.043	31.6228
368.4	14.094	115.341	51	416.96	9.84	164.678	12.9	181.829	0.182825	334.85	1	279.729	4.6	909	38.52	172.59	1.65	388.421	1.3	870.576	100
374.4	31.4094	116.627	35	422.16	12.58	166.313	7.4	183.341	0.159719	336.732	1.2	282.303	3.8	913	29.48	174.15	1.39	390.4	1.2	875.108	19.9526
376.8	33.4228	117.306	60	427.37	10.68	166.378	6.3	184.844	0.0171031	340.765	0.8	285.392	3	916	21.27	175.7	1.34	390.47	0.8	880.288	39.8107
378	38.255	117.986	63	432.93	10.56	167.948	7.2	186.47	0.129002	342.916	0.7	287.708	2.9	921	18.33	177.26	1.56	392.518	2	885.468	39.8107
381.6	35.4362	118.665	43	438.85	10.46	169.583	7.5	188.102	-0.0173108	345.605	0.8	290.025	3.7	941	10.67	178.74	1.68	394.566	3.1	890	50.1187
385.2	17.7181	119.345	50	444.77	11.49	169.649	5.2	189.724	0.217237	348.831	1.2	293.114	6.8	947	28.66	180.389	1.76	395.65	1.1	894.532	63.0957
388.8	25.3691	120.024	60	450.69	9.23	172.723	4.4	191.621	0.069002	353.671	1.5	295.173	5.7	952	13.44	181.9	1.32	396.615	1.4	899.712	15.8489
396	33.8255	120.704	42	456.68	10.18	174.489	6	193.567	0.285918	356.897	1.3	297.747	6.3	957	28.42	183.478	1.22	398.275	0.8	904.892	100
399.6	30.604	121.383	51	462.99	8.29	176.124	4.1	195.596	0.405736	359.048	1.1	300.836	5.5	962	5.58	185	1.21	398.663	1.1	909.424	79.4328
403.2	35.0336	122.063	28	469.3	6.73	176.189	4.1	205.164	1.13577	361.737	0.9	303.153	5.1	967	15.99	187	1.3	400.711	1.2	913.957	25.1189
404.4	50.3356	122.742	49	475.61	9.73	177.759	6	207.735	1.38348	364.963	0.9	305.212	4.5	975	13.56	189.167	1.21	402.76	1.8	919.137	39.8107
406.8	37.4497	123.422	32	481.92	9.8	179.394	5.3	210.312	1.41206	369.803	0.9	316.28	5	1009	3.21	191.356	1.1	403.267	0.7	924.317	15.8489
408	46.3087	124.101	24	488.23	11.9	179.459	4.1	212.94	1.04902	371.685	0.6	318.339	5.2	1014	19.87	193.549	0.7	404.808	1.2	926.906	79.4328
409.2	44.698	124.781	15	494.34	12.26	179.917	4.8	215.535	2.24326	375.18	0.9	320.913	4.7	1042	12.01	195.723	0.99	405.933	1.3	928.849	39.8107
410.4	51.1409	125.46	18	499.63	15.97	181.029	5.7	218.003	1.41183	377.062	1.5	324.002	6.1	1042	12.76	199.089	0.8	406.856	2.5	933.381	251.189
415.2	28.5906	126.14	14	504.92	18.08	182.599	6.4	220.412	1.5682	381.095	2.4	326.318	4.5	1047	21.39	200.067	0.6	408.905	1.5	938.561	6.30957
416.4	29.7987	126.819	15	510.21	23.05	184.299	6.2	222.555	1.70332	383.246	2.1	328.635	4.7	1052	32.52	202.234	0.61	409.308	1	943.741	50.1187
418.8	25.3691	127.499	11	515.5	21.71	186	7.1	224.706	2.01125	385.935	2.4	331.724	3.8	1054	19.67	204.478	0.89	411.158	1.8	948.273	63.0957
423.6	48.3221	128.178	5	520.79	13.48	188.832	10.5	226.82	1.45041	389.162	2.3	333.783	4.5	1059	29.87	206.649	0.69	413.001	1.5	952.806	79.4328
424.8	39.0604	128.858	16	526.08	19.2	191.782	8.2	228.937	1.63271	394.001	1.7	336.357	3.9	1092	13.66	208.876	0.9	413.154	1.2	955.396	15.8489
427.2	42.2819	129.537	19	531.37	12.99	191.9	6.7	231.02	1.24757	397.228	1.7	339.446	2.3	1103	12.14	211	0.81	415.05	1.2	983.261	79.4328
428.4	27.7852	130.217	0	536.66	17.77	192.608	6.1	233.071	2.01099	399.379	2.3	341.762	2.7	1114	14.16	213.219	0.76	415.846	1	988.153	63.0957
429.6	14.094	130.896	7	541.95	16.16	194.732	9	235.148	2.33467	402.067	1.4	344.079	3.9	1125	17.54	215.432	0.71	417.098	1	989.784	398.107
432	19.7315	131.576	1	547.24	12.07	197.564	9.5	237.42	2.03738	405.294	1	347.168	1.8	1136	25.03	217.451	0.78	417.769	1.3	994.676	79.4328
433.2	18.1208	132.255	12	553.49	11.22	200.632	8.2	239.711	2.0374	410.133	1.5	349.227	2.1	1146	17.76	219.378	0.67	419.146	1.7	999.568	79.4328
436.8	25.3691	133.057	5	559.73	16.25	203.7	5	241.627	1.73839	412.016	2	351.029	2.2	1163	21.31	221.308	0.88	420.077	0.9	1006.09	63.0957
439.2	24.1611	134.343	5	565.98	13.94	204.29	5.1	243.504	1.68164	415.511	2	354.89	3.2	1174	14.98	223.2	0.9	421.195	1.6	1012.61	100
440.4	41.0738	136.143	9	572.22	17.57	206.532	7.9	245.398	1.34831	417.393	1.6	356.949	4	1236	33.65	224.139	0.78	422.769	1.1	1019.14	39.8107
442.8	28.1879	137.428	7	578.47	23.76	209.6	4.9	247.307	2.02978	421.426	1.7	359.523	5.1	1247	9.43	227	0.99	423.243	2.9	1024.03	39.8107
445.2	16.9128	138.714	2	584.71	14.55	210.308	9.8	249.236	1.94266	423.577	1.5	369.819	2.1	1253	37.39	228.945	0.91	425.328	2.7	1030.55	50.1187
448.8	25.7718	140	0	590.96	13.91	218.45	7.4	251.572	2.18753	426.266	1.7	372.393	2.5	1265	21.02	230.856	0.83	426.615	1.2	1037.07	39.8107
448.8	30.604	141.285	4	597.2	14.35	221.4	5.2	254.187	1.65174	429.492	2.3	375.482	6.6	1311	17.95	232.7	1	428.605	3.9	1043.6	39.8107
450	28.5906	142.571	0	603.45	15.1	221.4	8.3	256.823	1.42231	434.332	1.8	377.798	5.5	1323	21.82	234.654	0.99	428.923	1.4	1048.49	39.8107
452.4	36.6443	143.857	10	606.08	13.95	224.232	6.3	259.487	0.964181	437.558	1.9	379.6	5.6	1336	24.96	236.454	0.89	431.881	5.6	1055.01	79.4328
453.6	35.0336	145.142	19	608.71	19.48	227.3	6.1	261.855	0.952325	439.709	1	383.204	4.7	1349	21.62	238.454	0.59	432.171	1.6	1061.53	100
456	51.1409	146.428	0	613.96	17	227.3	11.1	264.175	1.02284	442.398	1.5	385.263	4.7	1361	16.82	240.356	0.87	432.857	2	1063.17	79.4328
458.4	45.1007	147.713	0	616.59	18.75	230.132	9.4	266.598	1.29419	445.624	1.2	387.837	6	1374	23.52	242.245	0.65	435.158	4.7	1072.95	100
459.6	54.7651	148.999	0	619.22	16.95	233.436	7.5	269.093	1.18361	450.464	1	390.926	7.3	1391	13.71	244.159	0.67	438.435	4.9	1079.47	63.0957
462	17.7181	150.285	8	623.79	15.79	236.15	4.5	272.11	0.882605	461.756	0.9	393.243	4.1	1404	6.83	246.003	1	441.711	5.4	1086	79.4328
464.4	19.7315	151.57	11	628.35	12.58	239.1	4.6	275.548	0.689315	463.907	1	395.559	3.6	1417	20.3	247.976	0.69	444.988	3.5	1092.52	39.8107
465.6	19.7315	152.856	5	632.92	21	239.1	7.5	279.702	0.988662	466.596	0.9	398.648	2.9	1429	9.92	249.876	0.67	448.264	2.9	1097.41	39.8107
466.8	27.7852	154.142	0	637.48	22.53	242.64	4.4	284.279	1.06508	469.823	1.1	400.707	2.6	1485	10.85	251.765	0.56	451.868	3.6	1103.93	19.9526
469.2	26.1745	155.427	0	642.05	15.08	244.882	4.4	288.88	0.849466	474.662	0.7	402.509	3.5	1507	10.68	253.587	0.99	454.817	3.4	1110.46	39.8107
471.6	39.8658	156.713	3	646.62	9.5	245	4.4	293.59	1.14691	477.889	0.8	406.37	5	1520	17.35	255.578	1.2	458.094	3.9	1110.46	39.8107
475.2	16.9128	157.999	0	651.18	9.19	246.55	3.6	298.623	0.877818	480.04	1	408.429	5.8	1554	12.43	257.478	1.2	461.371	5.5	1116.98	50.1187
476.4	18.9262	159.284	1	655.75	13.02	247.852	2.9	303.935	1.09221	482.728	1.1	411.003	4.4	1566	19.51	259.378	1.5	464.647	3.5	1125.95	31.6228
477.6	18.1208	160.57	0	660.32	9.68	249.65	3.3	308.733	1.20419	485.955	0.9	414.092	4.1	1634	16.13	261.302	1.54	467.924	4.3	1139.81	50.1187
480	35.4362	161.856	0	664.88	9.97	251.076	3.9	312.592	1.54057	490.794	1.1	416.408	5.8	1643	18	263.221	1.4	471.2	3	1146.33	100
482.4	17.3154	163.141	8	669.45	14.96	251.2	4.5	315.664	1.40544	492.677	1.5	418.725	3.7	1655	25.46	265.134	1.32	474.477	2.4	1151.22	50.1187
482.4	40.2685	164.427	0	674.01	10.81	252.998	4.6	317.72	0.900843	496.172	1.2	421.814	3.4	1667	25.3	266.007	1.2	477.753	1.4	1154.48	63.0957
486	17.7181	165.774	6	678.58	8.47	254.238	4.3	319.743	1.33322	498.054	1	423.873	5	1718	22.39	268.902	1.33	481.03	2.1	1161.01	79.4328
486	40.2685	167.472	9	684.34	12.3	254.3	4.2	321.573	1.54563	515.53	1.1	426.447	5.1	1732	18.58	270.876	0.99	484.307	1.5	1167.53	100
488.4	41.8792	169.169	1	690.09	16.41	255.974	5.6	323.338	1.1184	517.681	1.4	429.536	4.6	1744	30.31	272.743	1.34	487.583	1.4	1174.05	79.4328
490.8	23.3557	170.867	0	695.85	15.6	258.888	5.6	325.058	1.18717	520.37	1.7	431.853	5.1	1772	54.22	274.629	1.5	490.86	1.4	1178.94	100
492	14.8993	172.565	0	701.6	13.21	260.5	5.2	326.847	1.01046	523.597	1.1	434.169	7.5	1805	48.62	276.548	1.2	494.136	1.7	1185.47	79.4328
493.2	19.3289	174.263	0	707.36	12.92	260.81	4.6	328.584	1.14426	528.436	1.3	437.258	3	1819	39.05	278.442	1	497.413	1.8	1191.99	79.4328
495.6	25.3691	175.621	0	712.2	6.49	263.6	6.3	330.17	0.843874	531.663	1.7	439.317	4	1831	17.62	280.319	0.99	501.017	1.6	1198.51	79.4328
498	44.698	177.416	0	717.03	6.58	263.972	5.3	331.202	1.90293	533.814	1.2	441.119	2.1	1842	30.36	282.261	0.92	503.966	2.2	1203.41	31.6228
499.2	37.047	179.326	7	722.35	12.42	265.212	5.2	332.207	1.67708	536.502	1.6	444.98	2.3	1856	31.11	284.139	0.87	507.242	1.5	1209.93	39.8107
500.4	35.0336	181.236	3	726.7	6.95	266.39	4.4	333.186	1.17493	539.729	0.8	447.039	2.7	1892	12.14	285.999	0.56	510.519	1.9	1216.45	50.1187
502.8	47.9195	183.147	22	731.54	10.96	268.312	3.6	334.141	1.26872	544.568	1.1	449.613	2.1	1906	28.78	287.945	0.77	513.796	1.5	1222.97	50.1187
502.8	18.5235	185.057	7	736.38	13.71	269.8	3.2	335.126	1.03126	546.451	1.2	452.702	2.7	1919	35.3	290.876	0.81	517.072	1.8	1227.87	25.1189
505.2	28.5906	186.967	13	741.21	7.18	269.8	4.8	336.658	1.06902	549.946	1.6	455.018	2.4	1932	35.95	291.123	0.73	520.349	1.6	1234.39	50.1187
506.4	26.5772	188.877	1	746.52	14.84	270.668	3.6	338.161	1.26589	551.559	1.4	457.335	2.7	1968	34.99	292.278	0.65	523.767	2.6	1240.91	31.6228
508.8	32.6174	190.787	0	752.29	8.76	272.776	4.5	339.639	1.06047	555.861	1.8	460.424	2.8	1983	22.2	293.419	0.59	527.754	3.5	1247.43	63.0957
511.2	25.3691	192.666	0	758.06	8.2	272.9	5.9	341.102	1.44953	558.012	1.8	462.483	2.7	1990	20.95	294.622	0.49	531.74	2.6	1252.33	79.4328
513.6	33.4228	194.433	10	763.84	10.96	306.24	4	346.572	0.670129	560.701	2.1	465.057	2.9	1994	26.34	295.734	0.55	535.726	3.5	1258.85	79.4328
516	24.9664	196.201	0	769.61	12.83	309.6	5.2	347.792	0.450757	563.927	1.9	468.146	2.8	2019	33.46	296.959	0.59	539.713	4	1259.66	39.8107
518.4	34.6309	197.968	35	774.8	10.73	310.02	4.7	349.011	0.441537	568.767	1.5	470.462	3	2027	35.47	298.099	0.8	543.699	3	1260.48	79.4328
520.8	28.9933	199.735	17	775.96	10.67	313.24	6.8	350.236	0.604116	571.993	1.7	472.779	3	2035	47.06	299.23	0.69	547.685	4.1	1267	31.6228
522	34.6309	201.502	22	781.15	14.08	316.6	9.2	351.485	0.533346	574.144	1.7	475.868	2.6	2043	56.35	300.459	0.66	552.07	5	1291.46	100
524.4	33.4228	203.269	31	786.45	13.53	316.88	9.8	352.741	0.713133	576.833	1.9	477.927	2.4	2051	56.28	301.598	0.69	555.658	4.7	1304.51	56.2341
525.6	38.6577	205.036	14	791.27	19.89	320.1	13.1	354.008	0.854652	580.059	1.3	479.729	2.1	2059	32.57	302.778	0.99	559.644	4.5	1309.4	100
528	28.5906	206.803	21	796.09	11.51	326.96	5.5	355.322	0.802178	584.899	2.2	483.59	2.5	2071	18.26	303.928	0.78	564.91	3.2	1315.92	89.1251
529.2	37.047	208.571	3	800.27	7.18	330.6	6.7	356.776	0.886899	586.781	1.3	485.649	2.4	2079	56.18	305.125	0.8	570.725	2.9	1320	100
531.6	30.604	210.338	21	804.45	9.96	337.6	5.1	358.251	0.668572	590.276	2.2	488.223	2.5	2087	41.64	306.245	0.59	576.54	3.4	1322.45	100
534	45.906	212.105	17	808.62	13.38	337.88	2.8	359.751	0.812752	592.158	2.1	491.312	3.8	2095	35.62	307.453	0.68	582.355	3.6	1328.97	79.4328
536.4	37.047	213.872	29	812.8	8.58	341.1	2.9	361.375	0.770496	596.191	2.4	493.628	3.7	2103	49.66	308.589	0.72	588.169	3.4	1333.86	79.4328
540	43.4899	215.639	10	816.98	14.21	348.1	4.8	363.051	0.767112	598.342	2.8	495.945	3.4	2111	41.52	309.745	0.77	593.984	4.4	1340.38	63.0957
546	39.8658	217.406	2	820.74	12.7	351.6	8.6	364.766	0.589092	601.031	1.9	499.034	3.1	2123	35.88	310.908	0.48	599.799	2.4	1413.76	63.0957
548.4	47.1141	219.173	3	821.58	14.66	351.88	8.9	366.492	0.570712	604.258	1.8	501.093	3.2	2131	41.06	312.109	0.57	605.613	4.3	1415.4	79.4328
554.4	36.2416	220.684	0	825.34	17.49	358.6	8.9	368.259	0.453235	609.097	2.6	503.667	5.5	2139	55.2	313.217	0.51	611.428	3.4	1421.92	79.4328
566.4	39.0604	221.973	0	829.51	16.83	358.88	11.7	370.083	0.119464	612.324	1.8	506.756	3.4	2163	55.51	314.428	0.55	616.441	2.6	1428.44	50.1187
574.8	33.8255	223.261	0	833.69	13.19	364.9	9.2	372.196	0.165697	614.475	2.1	509.072	3	2174	46.61	315.599	0.56	618.244	2.6	1434.96	63.0957
580.8	43.0872	224.55	0	837.87	14.88	369.24	9	377.542	1.13491	617.163	3	511.389	3.3	2182	39.89	316.741	0.72	620.047	2.9	1439.86	63.0957
586.8	37.047	225.839	2	843.29	16.34	372.6	9.5	380.485	0.620086	620.39	2.3	514.478	4.3	2190	58.69	317.904	0.71	622.031	4.4	1446.38	56.2341
592.8	39.4631	227.128	13	849.95	20.77	373.16	8.7	384.061	0.638645	625.229	1.7	516.537	3.8	2198	29.98	319.112	0.69	623.654	4.3	1452.9	67.6083
600	34.6309	228.417	21	856.6	17.18	379.6	9.2	387.869	0.476323	627.112	1.8	518.339	4.2	2206	35.78	320.256	0.61	625.457	2.8	1459.42	77.6247
602	39.8438	229.706	16	863.26	14.6	379.88	10.3	391.933	0.62887	630.607	1.1	522.2	3.9	2213	38.86	321.437	0.59	627.26	3.3	1464.32	63.0957
604.186	36.0938	230.994	1	869.92	12	383.1	11.2	396.286	1.33884	632.489	1.1	524.259	3.3	2234	43.34	322.589	0.77	629.063	4.2	1470.84	77.6247
609.767	40.7813	232.283	0	875.91	9.09	390.1	21.6	400.912	1.51689	636.522	1.3	526.833	4	2242	52.78	323.765	0.87	630.867	4.3	1477.36	46.7735
613.953	30.9375	233.576	17	883.23	7.37	393.6	19.5	405.661	1.68819	638.673	1.6	529.922	3.7	2250	37.54	324.965	0.89	632.67	4.3	1483.88	67.6083
616.744	32.3438	235.479	18	889.89	9.01	394.72	21.1	410.476	1.45117	641.362	1.4	532.238	2.5	2258	28.57	326.154	0.61	634.473	4.7	1488.78	36.3078
620.93	31.875	237.381	17	896.54	7.96	400.88	10.9	415.358	1.46863	644.588	1.5	534.555	3.5	2270	49.11	327.234	0.89	636.276	3.6	1495.3	97.7237
627.907	40.3125	239.284	20	903.2	12.58	404.1	12.8	420.068	1.83286	649.428	2.4	537.644	4.3	2277	31.38	328.415	0.78	638.08	4.4	1501.82	34.6737
641.86	37.5	241.187	7	909.86	10.64	407.6	7.2	423.431	2.09183	652.654	2.9	539.703	4.6	2285	37.5	329.578	0.59	639.883	5.2	1508.35	63.0957
646.047	45	243.089	18	916.51	8.83	411.1	6.1	426.49	1.51753	654.805	1.9	542.277	3.7	2294	38.28	330.755	0.8	641.686	4.7	1509.16	45.7088
648.837	40.7813	244.847	14	923.17	8.87	415.3	7.9	429.281	1.62741	657.494	1.7	545.366	5.8	2302	51.86	331.9	0.72	643.489	5.6	1513.24	53.7032
651.628	45.4688	246.482	0	929.83	11.4	422.44	7.6	431.775	1.83717	660.72	2.1	547.682	4.7	2310	54.64	333.1	0.72	645.293	6.5	1519.76	74.131
657.209	37.0313	248.116	6	936.49	14.23	424.815	5.9	434.169	1.62298	668.249	1.5	549.999	4.2	2317	51.67	334.259	0.69	647.096	6	1526.28	79.4328
657.209	31.875	249.75	8	942.48	18.75	430.988	5.2	436.853	1.94109	669.593	1.6	553.088	4.2	2329	35.39	335.423	0.99	649.079	8.4	1532.81	30.1995
661.395	34.2188	251.385	10			434.255	6.5	439.684	2.14274	670.937	1.3	555.147	3.5	2337	25.23	336.601	0.98	650.702	6.4	1532.81	123.027
665.581	29.0625	253.019	25			436.918	6.4	442.219	2.12307	672.819	1.3	556.949	4	2345	52.37	337.723	1.2	652.506	7.3	1537.7	74.131
666.977	34.2188	254.654	0			439.944	6.2	444.703	1.40746	676.852	1.4	560.81	2.9	2353	40.67	338.919	1.3	654.309	6.9	1544.22	46.7735
669.767	32.8125	256.288	5			439.944	7.7	447.617	1.58409	679.003	1.3	562.869	4.4	2369	35.25	340.102	1.2	656.112	6.9	1550.74	36.3078
672.558	29.0625	257.923	0			442.243	5.6	450.868	1.22981	681.692	1.5	565.443	6.7	2380	37.47	341.2	1.23	657.915	5.2	1557.27	40.738
675.349	38.9063	259.557	9			442.969	6.2	455.388	1.48033	684.919	1.9	568.532	6.6	2388	42.73	342.409	1.5	659.718	4.4	1558.08	141.254
676.744	30.4688	261.192	5			445.632	6.1	460.073	1.19703	689.758	2.6	570.848	5.5	2396	43.28	343.589	1.34	661.522	5.2	1562.16	43.6516
679.535	35.1563	262.826	0			455.072	9	464.297	1.27623	692.985	1.4	573.165	4.9	2405	27.54	344.743	1.39	663.325	5.8	1568.68	60.256
680.93	26.7188	264.46	0			458.097	6.7	476.595	1.02805	695.136	1.4	576.254	6.8	2420	39.73	346.145	1.2	665.128	6	1569.5	37.1535
683.721	42.1875	266.095	0			458.703	6.1	479.347	1.05596	697.824	1.9	578.313	5.9	2432	35.05	347.087	1	666.931	5.7	1570.31	81.2831
687.907	18.75	267.729	0			461.123	13.1	481.911	0.76125	701.051	2.1	580.887	4.4	2440	30.89			668.735	5.7	1576.83	61.6595
693.488	40.7813	269.364	12			463.423	10.6	484.357	0.812052	705.89	2.2	583.976	4.2	2448	27.54			670.538	5.2	1576.83	147.911
697.674	40.7813	270.998	1			464.149	14.4	486.637	1.35932	707.773	1.9	586.292	2.8	2456	36.74			672.341	5.4	1583.36	83.1764
704.651	22.9688	272.633	0			467.174	5.6	488.811	1.37199	711.268	2.6	588.609	3.3	2464	45.24			674.144	6.7	1589.88	97.7237
707.442	22.9688	274.267	3			472.984	8.2	490.928	1.29044	713.15	1.3	591.698	3.4	2472	43.29			675.767	4.2	1594.77	91.2011
711.628	15	275.901	0			476.251	6.5	492.998	1.4385	717.183	2.3	593.757	4.2	2487	25.02			677.751	3.2	1598.03	107.152
715.814	34.2188	277.536	0			476.977	6.5	495.007	1.26565	719.334	2	595.559	3.9	2495	41.27			679.554	3	1601.29	114.815
720	37.0313	279.17	0			479.277	6.9	497.204	1.38665	722.023	2.2	599.42	5.7	2503	24.61			681.357	3.2	1607.82	87.0964
720	49.6875	281.504	4			481.939	6	499.345	1.25883	725.249	1.9	601.479	5.9	2511	28.16			683.436	3.3	1614.34	64.5654
722.791	39.375	284.906	2			482.303	6.1	501.593	1.49397	730.089	1.9	607.142	6.3	2519	25.55			686.613	2.8	1619.23	95.4993
724.186	37.5	288.309	0			486.538	7.6	503.862	1.64676	733.315	2.2	612.29	2.6	2527	42.1			689.791	2.2	1622.49	104.713
726.977	41.7188	291.608	19			491.379	7.5	506.108	1.43549	735.466	3.3	614.349	2.1	2538	31.31			692.969	1.8	1625.76	72.4436
731.163	63.2813	294.541	5			494.284	7.3	508.337	1.65634	738.155	4	616.923	2.9	2546	18.02			696.147	1.8	1632.28	72.4436
733.953	60	297.475	20			494.405	8.7	510.522	1.63404	741.381	2.8	620.012	3.5	2557	46.97			699.324	2.5	1638.8	141.254
736.744	29.5313	300.408	22			498.036	8.9	512.639	1.33196	746.221	3.2	622.328	2.9	2571	15.82			702.502	1.8	1643.69	39.8107
739.535	45	303.342	22			500.456	6.7	514.739	1.37731	748.103	3	624.645	2.1	2664	54.06			705.68	3	1646.95	53.7032
742.326	22.9688	306.275	4			502.877	5.2	516.629	0.797007	751.598	2.6	627.734	5.2	2676	30.95			708.858	4.3	1650.22	125.893
745.116	44.0625	308.29	27			509.654	7.9	518.486	1.05828	752.943	2.5	629.793	7.6	2716	29.4			712.036	6.8	1656.74	95.4993
749.302	33.75	309.717	8			512.559	7	520.3	1.60645	770.957	2	632.367	5.9	2731	30.01			715.213	6.6	1663.41	77.6247
750.698	41.25	311.145	16			512.922	9.1	521.919	1.54186	773.108	1.9	635.456	5.6	2746	27.27			718.391	5.2	1668.52	85.1138
752.093	37.5	312.572	29			515.585	10	523.551	1.41853	773.108	3.4	637.772	4.1	2761	34.23			720.298	7.5	1671.93	123.027
753.488	42.6563	314	27			518.61	6.1	525.179	1.36887	775.797	1.8	640.089	3.7	2776	32.4			723.476	4.4	1675.33	44.6684
757.674	23.4375	315.427	43			518.61	7.9	526.679	1.89862	779.023	1.7	643.178	2.8	2791	35.37			726.653	3	1682.15	26.9153
760.465	24.8438	316.854	51			521.636	10.7	528.194	1.76695	783.863	1.9	644.722	2.9	2812	34.66			729.831	7	1688.96	32.3594
761.86	21.0938	317.772	16			524.662	5.5	529.721	1.81648	787.089	2.3	650.9	2.6	2826	30.14			733.009	7.8	1688.96	112.202
766.047	50.1563	318.56	12			527.324	7.6	531.341	2.3439	789.24	1.3	652.959	2.7	2841	21.66			736.187	8.8	1694.07	38.0189
770.233	35.1563	319.349	11			530.713	6.2	532.992	1.62986	791.929	2.6	655.533	2.7	2856	33.45			739.364	8.4	1700.89	33.8844
773.023	53.9063	320.137	20			533.375	6.9	534.654	1.9206	795.155	2.2	658.622	3.4	2873	15.76			742.542	6.9	1707.7	52.4807
774.419	51.0938	320.925	35			536.764	8	536.581	1.6336	801.877	4.4	660.938	5.8	2880	15.88			745.72	5.9	1714.52	89.1251
777.209	54.8438	321.712	44			536.764	9.6	538.586	1.62591	805.372	3.6	663.255	7.9	2889	14.88			748.898	7.5	1715.88	85.1138
781.395	42.6563	322.5	45			540.274	8.8	540.712	0.972025	806.986	3.2	666.344	4.2	2907	19.34			752.076	6.3	1719.63	70.7946
782.791	43.125	323.288	54			542.21	9.2	543.113	1.51519	811.287	2.7	668.403	3.3	2922	29.17			755.253	4.6	1726.44	117.49
786.977	37.5	324.077	50			545.841	9.2	545.587	1.76585	813.438	3.4	670.977	4	2937	41.45			758.431	4.2	1728.15	95.4993
789.767	39.375	324.865	47			548.867	6.6	548.303	1.05405	816.127	2.7	674.066	4.1	2952	37.89			761.609	5.5	1734.96	85.1138
792.558	25.7813	325.652	49			548.988	6.1	551.064	1.16599	819.354	2.8	676.382	4	2967	23.02			764.787	4	1741.78	85.1138
798.14	23.4375	326.44	45			550.077	5.2	553.891	1.19977	824.193	2.9	678.699	4.6	2982	16.22			769.236	2.6	1744.33	102.329
805.116	37.5	327.228	36			551.771	4.7	556.736	0.768378	827.42	3.5	681.788	7.7	2999	37.03			772.413	2.9	1753.7	79.4328
807.907	39.8438	328.017	45			554.071	6.7	559.594	0.855918	829.571	3.5	683.847	4.1	3014	28.87			775.591	1.8	1767.33	120.226
810.698	36.0938	328.805	29			554.918	6.4	562.269	0.856625	832.259	2.6	685.649	4.2	3029	24			778.769	1.8	1769.89	100
814.884	39.375	329.592	34			555.16	7.7	564.913	0.79477	835.486	2.1	689.51	4.8	3044	25.87			781.947	1.8	1779.26	91.2011
817.674	32.8125	330.38	66			558.065	5.6	567.353	1.30438	840.325	0.5	691.569	5.4	3057	22.34			783.87	2.7	1792.89	104.713
819.07	36.5625	331.168	39			559.759	5.3	569.785	0.833317	842.208	3.4	694.143	4					785.255	2.3	1795.44	83.1764
821.86	29.5313	331.957	36			560.969	6.5	571.992	0.568658	845.703	2.4	697.232	2.6					786.64	2.9	1804.81	69.1831
824.651	24.375	332.745	34			560.969	9.5	574.174	0.834887	847.316	2.1	699.548	4					788.026	3.2	1811.63	93.3254
830.233	44.5313	333.533	38			565.568	7.5	576.262	0.663619	851.618	1.9	701.865	9.6					789.411	4.2	1818.44	123.027
831.628	29.0625	334.32	41			568.473	5.3	578.289	1.36023	853.769	2.2	704.954	2.4					790.797	5.5	1821	91.2011
834.419	38.4375	335.108	47			568.715	6.6	580.285	1.09062	856.458	1.4	707.013	11.1					792.182	4	1825.26	114.815
837.209	21.0938	335.897	0			571.741	5.3	582.143	1.28751	859.684	2.3	709.587	5.8					793.567	5.3	1846.56	123.027
838.605	52.5	336.685	24			574.766	6.7	583.993	1.2029	864.524	2.6	712.676	7.3					794.953	7.5	1862.74	79.4328
842.791	31.875	337.473	35			575.371	6.8	585.816	1.41259	867.75	3.2	714.992	4.7					796.338	5.9	1869.56	151.356
841.395	59.0625	338.26	0			580.454	14.3	587.608	1.85019	869.901	3	717.309	6.1					797.723	8.3	1872.11	100
842.791	57.6563	339.048	14			584.085	14	589.389	1.09375	872.59	2.9	720.398	5.4					799.109	6.9	1892.94	5.12861
844.186	67.9688	339.921	1			586.869	11.8	591.133	1.61024	875.816	2	722.457	4.4					800.494	8.2	1893.92	45.7088
851.163	30	341.413	11			586.869	13.3	592.851	1.40797	880.656	1.4	724.259	4.5					801.88	7.1	1902.06	27.5423
852.558	64.6875	342.904	14			590.136	15.5	594.555	1.4574	882.538	2.5	728.12	6.1					816.915	2	1911.57	89.1251
855.349	65.1563	344.396	8			592.92	14.1	601.161	0.763968	886.033	2.2	730.179	4.1					822.02	2.8	1916.76	70.7946
856.744	37.9688	345.888	1			595.946	7.4	602.794	0.862686	887.647	1.3	735.842	3.5					827.125	4.4	1931.47	32.3594
858.14	32.3438	347.38	0			598.729	6.1	604.407	1.57759	891.948	1.9	738.158	4.3					832.23	2.4	1946.18	25.1189
859.535	55.7813	348.872	24			602.239	4	606.073	1.57801	894.099	1.7	740.475	4.4					837.335	3.2	1955.69	64.5654
862.326	38.4375	350.363	0			604.902	4.9	607.76	1.44852	896.788	1.6	745.623	5.2					842.439	3.1	1960.88	46.7735
865.116	41.7188	351.855	25			605.023	4.1	609.422	1.2314	900.015	1.7	748.197	6.3					847.544	3.1	1975.59	34.6737
867.907	48.2813	353.347	22			608.048	4.5	611.203	1.42259	904.854	1.5	751.286	3.9					852.649	2.7	1987.06	42.658
873.488	17.3438	354.839	9			611.074	4.8	613.032	1.51721	908.081	2.1	753.602	3.9					857.754	2.9	1999.8	114.815
874.884	46.875	356.33	0			611.074	5.4	614.829	1.63347	910.232	2.7	755.919	3.9					862.859	2.5	2014.51	58.8844
877.674	34.6875	357.822	0			613.736	6.8	616.774	1.74345	912.92	3	759.008	6.8					866.959	3.2	2029.22	117.49
880.465	47.8125	359.314	2			616.762	7.2	618.7	1.46319	916.147	1.2	761.067	4.3					870.629	3.8	2043.92	42.658
881.86	52.0313	360.806	3			619.909	7.2	620.657	1.35683	920.986	1.3	762.869	4.3					874.299	3	2048.82	30.903
883.256	48.2813	362.298	0			622.934	6.7	622.726	1.54164	922.869	1.4	766.73	3.4					877.969	6	2058.63	46.7735
886.047	52.5	363.789	0			625.96	7.5	624.751	1.57138	926.364	1.5	768.789	3.7					881.639	10.8	2073.33	21.3796
887.442	48.75	365.281	7			628.986	10.1	626.793	1.65902	927.977	1.4	771.363	5.9					885.309	8.3	2078.24	144.544
890.233	51.5625	366.773	2			629.228	5.7	628.802	1.47737	931.472	1.5	774.452	5.5					888.979	7.1	2080.2	48.9779
891.628	39.375	368.265	8			632.011	6	630.769	1.67631	934.43	1.4	776.768	8.8					892.649	6.5	2092.45	70.7946
894.419	42.6563	369.756	1			635.037	5	632.695	1.625	937.119	1.8	779.085	6.5					896.319	7.9	2107.16	4.67735
897.209	22.0313	371.248	4			637.821	4.7	634.586	1.90417	940.345	1.6	784.233	2.2					899.989	7	2121.86	60.256
900	50.625	372.74	4			641.088	5.2	636.971	1.9603	944.916	1.6	786.807	5.3					903.659	3.9	2122.65	20.4174
902.791	27.6563	374.232	0			641.33	8	639.463	1.5237	948.411	1.7	789.896	5.8					907.329	4.9	2122.75	17.7828
904.186	48.75	375.723	21			644.114	5.1	641.51	1.41946	950.562	1.1	792.212	8					910.999	7.2	2122.84	29.5121
906.977	51.0938	377.215	0			647.382	5.9	643.415	1.43929	953.251	1.1	794.529	9.6					914.669	12.6	2136.57	114.815
909.767	45	378.707	2			647.382	5.9	645.353	1.47579	956.477	0.8	797.618	8.1					918.339	11.2	2151.27	34.6737
913.953	51.0938	380.199	2			650.165	4.8	647.592	2.09615	961.317	1.3	799.677	6.3					922.009	10.7	2173.33	50.1187
913.953	42.1875	381.69	16			653.191	7.3	649.804	1.66839	963.199	1.5	801.479	5.3					925.678	5.8	2184.61	53.7032
918.14	48.2813	383.182	0			656.458	7.6	651.213	1.77507	966.694	1.3	805.34	4.2					929.348	5.3	2199.31	50.1187
920.93	25.3125	384.654	10			659.114	7	652.531	2.28145	968.308	1.6	807.399	4.2					933.018	4	2214.02	38.0189
923.721	23.9063	385.76	0			659.227	7.4	653.838	1.44995	972.609	1.8	809.973	4.3					936.688	3.1	2228.73	64.5654
926.512	43.5938	386.865	13			660.534	7.3	655.111	1.3322	974.76	3.1	813.062	3.8					940.358	3.2	2243.43	87.0964
932.093	29.0625	387.971	5			661.954	10.7	656.173	1.71404	977.449	3	815.378	4.8					944.028	0.9	2258.14	77.6247
934.884	53.9063	389.077	9			662.067	11.3	657.229	2.22228	980.676	1.4	817.695	8					947.698	0.6	2266.47	37.1535
937.674	36.0938	390.183	7			663.374	9.3	658.28	1.77126	985.515	1.3	820.784	6.8					1257.98	2.6	2279.71	93.3254
941.86	47.8125	391.288	10			664.623	5.1	659.329	1.96062	988.742	1.5	822.843	6.1					1263.26	2.8	2293.16	87.0964
943.256	24.375	392.394	4			664.794	8.2	660.338	2.1328	990.893	1.1							1268.54	4.4	2303.71	9.54993
946.047	27.6563	393.5	14			666.384	4.1	661.282	1.78439	993.581	0.7							1273.82	3.3	2314.26	21.3796
948.837	43.125	394.606	31			666.384	4.2	662.227	2.1166	996.808	1.3							1279.1	3.3	2324.8	15.1356
954.419	29.5313	395.712	20			666.384	8.9	663.173	2.16828	1001.65	0.9							1284.38	3.8	2339.92	50.1187
958.605	46.4063	396.875	39			667.634	6.9	664.122	1.98052	1003.53	1.3							1289.88	1.5	2347.3	23.9883
964.186	28.125	398.156	40			667.804	4.5	665.077	1.94891	1007.02	2.1							1296.28	0.5	2357.85	8.31764
964.186	50.1563	399.437	56			669.054	8.6	666.071	1.77694	1008.64	2							1302.68	0.3	2368.4	27.5423
966.977	45.4688	400.718	30			669.11	4.9	667.071	2.63138	1012.94	2.8							1309.08	1.2	2378.95	52.4807
969.767	42.6563	401.998	48			669.224	5.2	668.078	1.82862	1015.09	2.2							1315.48	1.1	2389.49	45.7088
971.163	32.3438	403.279	40			670.644	5.3	669.095	1.7394	1017.78	1.7							1321.88	3.8	2400.04	10.2329
973.953	44.0625	404.56	45			671.95	5	670.128	1.74989	1021.01	1.4							1327.64	2.7	2406.72	7.58578
976.744	32.8125	405.841	47			673.143	6.1	671.211	1.43482	1039.29	2.2							1334.68	2.6	2414.1	19.0546
978.14	27.1875	407.123	51			674.904	8.8	672.308	2.06226	1042.52	2.3							1340.49	4.7	2424.65	23.9883
979.535	25.3125	408.404	51			674.904	9	673.42	1.94997	1044.67	1.4							1346.04	3.1	2435.2	14.1254
982.326	44.5313	409.685	51			676.324	9.9	674.548	1.77195	1047.36	2.2							1351.6	2.7	2445.74	25.1189
985.116	32.3438	410.966	42			677.63	12.4	675.694	1.53469	1050.58	1.4							1357.15	2.1	2456.29	54.9541
987.907	44.5313	412.247	50			677.744	13.4	676.861	1.36129	1055.42	1.7							1362.7	2.6	2466.84	81.2831
992.093	32.3438	413.527	49			679.164	11.8	678.048	1.49754	1057.3	1.6							1368.26	2.4	2527.14	9.12011
994.884	42.6563	414.808	31			680.47	11.1	679.255	1.47101	1060.8	1.7							1375.05	5.1	2636.34	38.9045
996.279	32.3438	416.089	31			681.663	10.7	680.447	1.13802	1062.68	2.4							1386.8	2.8	2704.31	46.7735
999.07	34.6875	417.37	27			683.424	12.8	681.603	1.54071	1066.71	1.6							1398.55	2.3	2772.28	41.6869
1000.47	28.125	418.651	33			683.424	13.3	682.782	0.993371	1068.86	1.9							1410.3	2.8
1003.26	23.4375	419.933	34			684.844	11.2	683.985	1.16946	1071.55	1.1							1420.6	4.3
1004.65	42.1875	421.214	30			686.15	9.3	688.425	1.44006	1074.78	2							1425.09	3.3
1007.44	36.0938	422.494	49			686.264	9	689.547	1.28991	1079.62	2.4							1429.59	3.8
1011.63	52.9688	423.775	27			687.684	13.1	690.651	2.00223	1082.85	1.5							1433.63	3.6
1010.23	33.75	425.056	0			688.99	15.9	691.747	1.38521	1085	1.4							1438.58	3
1011.63	37.0313	426.337	0			690.183	12	692.859	1.58084	1087.69	1.4							1443.07	2.4
1013.02	27.1875	427.618	0			691.944	8.2	693.988	1.80136	1090.91	1.5							1447.56	3.3
1014.42	45.4688	428.868	0			691.944	9.2	695.14	2.33741	1095.75	1.5							1452.06	3.3
1017.21	37.9688	430.071	5			693.364	7.7	696.361	3.26507	1097.63	1.6							1456.55	4.5
1018.6	44.0625	431.274	4			694.67	8.9	697.597	3.94854	1101.13	1.8							1463.52	3.2
1020	33.75	432.476	17			694.784	9.7	698.847	1.9926	1103.01	1.5							1471.54	2.7
1022.79	30.4688	433.679	0			696.204	11.8	700.127	2.4351	1107.04	1.3
1024.19	34.2188	434.881	13			697.51	7.4	701.596	2.20163	1109.2	1.4
1025.58	42.6563	436.084	0			698.192	7.8	703.078	2.06386	1111.88	1.4
1026.98	38.9063	437.287	0			698.703	8.3	704.573	1.77994	1115.11	1.6
1028.37	40.7813	438.489	15			700.464	8.4	706.352	1.8572	1119.95	1.5
1031.16	30.9375	439.692	0			700.464	9.2	708.252	2.06292	1123.18	1.3
1033.95	41.25	440.895	0			701.884	9.4	710.177	1.6392	1125.33	1.2
1033.95	42.1875	442.097	0			703.19	9.6	712.244	2.06335	1128.02	1
1036.74	32.3438	443.3	0			703.304	10	714.322	2.49915	1131.24	1.1
1039.53	34.6875	444.502	2			704.724	9.6	716.593	1.98832	1136.08	2.2
1042.33	28.125	445.705	7			706.03	7.4	718.963	2.63074	1137.96	1
1043.72	43.125	446.908	0			707.223	7.3	721.433	2.97756	1141.46	1.7
1046.51	52.5	448.11	0			708.984	8.5	723.982	2.47259	1143.34	1.7
1049.3	43.125	449.313	0			708.984	9.3	726.68	3.4054	1147.37	1.4
1050.7	39.8438	450.516	0			710.404	7.7	729.478	2.43887	1149.53	1.1
1052.09	45.4688	451.718	0			711.71	8.1	732.228	2.13152	1152.21	1.1
1054.88	38.9063	452.921	0			711.824	8.6	734.971	2.35557	1155.44	2.7
1059.07	48.75	454.124	0			713.244	10	737.793	1.71737	1160.28	2
1063.26	24.8438	455.326	0			714.55	13.5	740.593	2.97217	1163.51	1.7
1066.05	48.75	456.529	0			715.232	5.1	743.308	2.11683	1165.66	1
1070.23	21.5625	457.731	0			715.743	12.5	746.07	2.67988	1168.35	1
1075.81	38.9063	458.934	6			717.504	9.1	748.912	2.24704	1171.57	0.9
1081.4	28.125	460.137	0			718.64	5.1	751.833	1.83343	1176.41	1.3
1085.58	29.0625	461.339	0			718.924	11.1	754.799	2.42234	1178.3	1
1089.77	22.9688	462.542	0			719.89	6.4	757.758	1.75722	1181.79	2
1092.56	32.3438	463.745	0			721.48	4.3	760.7	1.59406	1183.67	2.3
1095.35	31.875	464.947	0			721.594	4.4	763.608	1.74719	1187.71	2.5
1096.74	21.5625	466.15	0			723.411	5.6	766.346	1.58171	1189.86	2.5
1103.72	51.5625	467.353	0			726.592	6.7	768.927	1.47841	1192.55	3
1110.7	46.875	468.555	0			727.842	5.7	771.378	1.44281	1195.77	2.2
1116.28	41.7188	469.758	0			729.432	6.1	773.732	1.58506	1200.61	2.3
1117.67	30.4688	470.96	0			743.029	7.7	775.855	1.43128	1203.84	2.1
1119.07	26.7188	472.163	0			745.943	7.7	777.709	1.43415	1205.99	1.9
1121.86	29.0625	473.366	0			751.6	10.9	779.548	1.60957	1208.68	2.6
1124.65	26.7188	474.568	0			768.743	12.2	781.112	1.13508	1211.9	2
1128.84	38.9063	475.771	0			777.314	9.9	782.577	1.32357	1216.74	1.7
1134.42	54.8438	476.974	0			779.714	9	784.028	1.50624	1228.04	1.6
1137.21	38.9063	477.936	0			794.457	12	785.431	1.21753	1230.19	1.6
1140	44.0625	479.138	4			803.029	11.4	786.75	1.42795	1232.88	1.4
1141.4	41.25	480.341	17			820.171	11.2	788.054	1.91707	1236.1	2.4
1146.98	50.1563	481.544	5			826	15	789.341	1.45444	1240.94	3.1
1151.16	24.8438	482.993	0			828.743	8.4	790.792	2.08622	1244.17	2.4
1153.95	21.0938	484.482	11			843.657	14.4	792.415	1.79352	1246.32	2.4
1156.74	42.1875	485.97	0			851.714	9.9	794.013	1.56535	1249.01	2.7
1160.93	24.8438	487.459	2			853.429	11.5	795.727	1.57765	1252.23	3.4
1166.51	33.2813	488.947	4			855.829	11.9	797.645	1.71284	1257.07	1.9
1172.09	47.8125	490.435	10			860.286	9.3	799.531	1.37441	1258.96	2.2
1179.07	34.2188	491.924	9			864.914	7.7	808.877	1.54014	1262.45	1.5
1180.47	37.9688	493.412	0			870.914	14.6	811.634	1.34037	1264.06	1.9
1181.86	33.75	494.901	0			879.486	11.9	814.598	1.28948	1268.37	1.7
1187.44	41.25	496.389	7			893.029	16.7	817.625	1.50873	1270.52	1.7
1194.42	30	497.877	10			896.629	15	820.605	1.36276	1273.21	2.1
1198.6	32.3438	499.366	4			905.2	10.4	823.47	1.72755	1276.43	1.8
1206.98	34.6875	500.854	1			913.111	21.5	826.23	1.9931	1286.65	2.7
1213.95	39.8438	502.342	0			915.6	10.7	828.879	1.55827	1289.88	2
1219.53	37.5	503.831	0			919.489	12.9	831.205	1.72167	1294.72	1.2
1223.72	38.4375	505.319	0			924.778	12.3	833.289	1.50181	1297.94	1.2
1230.7	37.5	506.808	9			927.267	11.8	835.237	1.60056	1300.09	1.3
1234.88	32.3438	508.296	6			931.156	17.4	836.615	1.95573	1302.78	1.5
1239.07	33.2813	509.784	10			936.444	17.5	837.98	1.4647	1306.01	1.7
1244.65	19.6875	511.273	0			938.933	10.8	839.333	1.73009	1310.85	1.1
1253.02	9.375	512.761	23			942.822	10.4	840.442	1.24706	1312.73	1.4
1254.42	14.0625	514.25	4			948.111	11.5	841.313	1.1832	1316.23	1.5
1261.4	28.5938	515.738	18			959.778	6.2	842.179	1.44572	1317.84	1.7
1272.56	44.5313	517.226	13			962.267	6.9	843.04	1.31123	1322.14	1.4
1273.95	42.6563	518.715	6			966.078	14.6	843.896	1.18191	1324.29	1.4
1276.74	44.5313	520.203	2			966.778	23.9	844.749	1.24015	1326.98	1.6
		521.692	1			972.222	18.8	845.534	1.3069	1330.21	2.5
		523.18	10			974.556	16.5	846.289	1.48419	1335.05	2.2
		524.669	26			978.444	12.9	847.043	1.38226	1338.27	1.5
		532.111	0			984.762	10.6	847.797	1.54587	1340.42	1.2
		533.599	0			987.619	7.1	848.551	2.28736	1343.11	1.1
		535.854	0			999.048	9.1	849.306	1.91278	1346.34	1
		538.121	0			1001.9	11.9	850.079	1.75494	1351.18	1.1
		540.388	1			1006.67	16.8	851.04	2.15136	1353.06	1.2
		542.655	0			1013.33	15.5	852.005	1.89845	1356.56	1.5
		544.923	5			1016.19	12.9	852.974	1.75113	1358.44	1.4
		547.19	0			1020.95	13.9	853.948	1.82528	1362.47	1.5
		549.457	0			1027.62	11.7	854.929	1.65788	1364.62	1.3
		551.724	0			1030.48	5.6	856.228	1.81552	1367.31	2
		553.991	0			1035.24	6	857.562	2.11426	1370.54	1.1
		556.259	0			1041.9	7.8	858.907	1.58873	1375.38	1
		558.526	0			1048.57	11.9	860.334	1.74616	1378.6	1.1
		560.793	0			1051.43	12.5	862.064	1.7608	1380.75	1.1
		563.06	0			1055.81	12.4	863.813	1.61138	1383.44	1.1
		565.327	0			1063.52	8.1	865.644	1.97171	1386.67	1.2
		567.595	12			1064.76	10.8	867.625	1.69035	1391.51	1.1
		569.862	3			1070.76	21.6	869.631	1.74876	1393.39	1.5
		572.129	9			1073.05	20.1	871.613	2.12112	1398.77	1.1
		574.396	4			1077.81	19.8	873.612	1.96852
		576.664	17			1085.05	18.6	875.565	1.70642
		578.931	39			1087.33	15	877.379	2.20605
		581.1	35			1092.1	15.4	879.222	2.28588
		582.955	21			1098.76	17.6	881.049	2.61903
		584.811	1			1101.62	11.9	882.872	2.38152
		586.667	0			1102.38	7.1	884.726	2.91904
		588.522	0			1104.86	6.8	886.461	2.72137
		590.378	0			1107.24	8.1	888.2	3.23361
		592.233	2			1109.62	5.6	889.971	2.65807
		594.089	1			1112	7.3	891.474	3.16709
		595.944	4			1114.57	9.9	893	3.30678
		597.8	0			1116.86	8.2	894.555	3.34721
		599.655	0			1120	10	895.94	2.49406
		601.511	0			1122.1	12.5	903.015	1.87045
		603.366	0			1124.1	14.9	904.56	1.85046
		605.222	0			1126.48	15	906.076	1.94878
		607.077	0			1128.95	15.3	907.6	1.98013
		608.933	0			1131.33	15	909.156	1.93194
		610.788	0			1133.71	14.3	910.798	1.76018
		612.644	0			1136.19	13.2	912.539	1.61761
		614.499	13			1138.57	9.8	914.317	1.42121
		616.355	20			1140.95	12.2	916.28	1.70686
		618.21	2			1143.43	12.8	918.374	1.63545
		620.066	8			1145.81	14.3	920.58	1.37921
		621.921	0			1148.29	12.9	923.051	1.45084
		623.519	0			1150.67	11.9	925.62	1.21517
		624.943	0			1153.05	8.7	928.407	1.10481
		626.367	0			1155.52	9.7	931.386	1.45352
		627.791	0			1157.9	6.6	934.594	1.50001
		629.215	5			1160.29	3.9	937.953	1.61306
		630.639	0			1162.76	4.5	941.419	2.01384
		632.063	0			1165.14	8.9	944.995	2.34932
		633.487	0			1167.62	7.5	948.485	1.65354
		634.911	2			1170	8.4	951.837	2.17333
		636.335	0			1172.38	5.5	955.077	2.30919
		637.759	0			1174.86	6.1	958.127	1.96174
		639.183	0			1177.24	8.7	960.974	1.97674
		640.607	0			1179.71	10.1	963.492	1.80184
		642.031	0			1182.1	13.2	965.855	1.85143
		643.455	0			1184.48	8.7	967.985	2.20316
		644.879	6			1186.95	13.4	970.095	1.42732
		646.303	4			1189.33	18.5	972.073	1.68489
		647.727	0			1191.9	17.1	974.028	1.83314
		649.151	0			1194.76	12.5	976.109	2.74796
		650.575	0			1197.14	9.4	978.308	1.99852
		652	0			1199.52	8.4	980.567	2.42073
		653.423	0			1201.46	7.6	983.135	2.19646
		654.847	0			1203.2	7.8	985.799	1.48491
		656.272	0			1205.5	10.9	988.834	2.04832
		657.696	0			1208.42	7.2	992.173	1.87168
		659.12	0			1210.16	6.9	995.658	2.14371
		663.392	0			1211.97	6.9	999.031	1.93559
		664.816	0			1213.71	8.2	1002.06	2.22001
		666.24	0			1216.35	5.9	1004.91	2.15517
		667.664	0			1218.72	7.3	1007.49	1.96846
		669.088	0			1220.74	6.7	1009.99	2.01438
		670.512	0			1222.48	7.3	1012.18	1.93698
		671.936	0			1224.22	11.3	1014.31	1.69573
		673.36	7			1225.96	14.4	1016.31	1.47137
		674.784	10			1227.7	9.5	1018.23	1.49978
		676.208	3			1229.44	10.6	1020.09	2.01613
		677.632	0			1231.25	16.8	1021.95	2.38672
		679.056	4			1232.99	17	1023.76	2.49311
		680.48	19			1234.73	13.1	1025.52	2.26674
		682.688	19			1236.47	14.8	1027.21	2.26016
		684.969	22			1238.21	14.4	1028.86	1.92859
		687.25	27			1240.02	11.3	1030.48	1.87578
		689.53	23			1241.75	9.9	1032.07	3.40889
		691.811	9			1243.49	9.1	1033.63	1.79651
		694.092	8			1245.23	8.2	1035.86	2.19755
		696.372	11			1246.97	7.6	1037.56	2.60858
		698.653	0			1248.71	5.5	1039.24	2.28126
		700.934	2			1250.52	5.6	1040.6	1.68743
		703.215	0			1254.56	5.3	1041.69	2.98617
		705.495	0			1256.37	4.7	1042.77	1.86823
		707.776	3			1258.11	4.4	1043.84	1.58056
		710.057	4			1259.85	4.7	1044.91	1.61131
		712.337	0			1261.59	6.5	1046.02	1.57855
		714.363	0			1263.68	12.1	1050.73	1.06775
		715.518	0			1265.42	10.8	1052.44	1.04635
		716.673	0			1267.23	11.5	1054.15	1.01104
		718.983	6			1268.97	11.5	1055.68	0.998904
		720.138	11			1270.5	8.3	1057.01	1.08822
		721.293	0			1272.31	8.8	1058.36	1.12067
		722.448	0			1275.23	8.8	1059.71	1.23726
		723.603	1			1277.59	14.6	1060.89	1.53991
		724.758	0			1279.4	8.4	1062.03	1.2464
		726.176	15			1281.14	6.3	1063.18	1.6127
		728.263	9			1282.88	5.4	1064.34	1.90645
		730.351	9			1284.69	4.4	1065.51	2.33659
		732.438	20			1286.43	7.6	1066.72	2.75974
		734.526	19			1288.24	7.3	1067.93	2.88148
		736.613	33			1289.98	6.5	1069.15	2.97222
		738.701	49			1291.72	8.2	1070.38	2.25339
		740.788	18			1293.53	12.2	1071.65	2.71692
		742.875	0			1295.27	17.6	1072.93	1.5624
		744.367	15			1297.08	19.1	1074.21	1.67025
		745.464	27			1298.82	20.4	1075.47	1.51298
		746.561	11			1300.63	20.7	1076.69	1.84238
		747.658	16			1302.37	18.5	1077.92	1.74805
		748.754	22			1305.92	15.1	1079.15	2.6177
		749.851	13			1307.66	13.3	1080.44	1.92858
		750.948	0			1309.47	10.4	1081.83	1.89338
		752.045	8			1311.21	8.4	1083.23	2.31664
		753.142	15			1313.02	12.2	1084.64	2.37606
		754.239	0			1314.76	17.2	1086.44	2.55445
		755.335	8			1316.5	15.2	1088.39	1.98803
		756.432	22			1317.89	10.3	1090.44	2.02271
		757.901	5			1320.05	6.6	1092.92	2.37208
		760.928	16			1321.85	6.2	1095.42	2.25918
		763.956	9			1323.59	6.2	1098	1.81035
		766.983	8			1325.4	6.9	1100.57	3.08457
		770.01	17			1327.14	11.8	1103.08	2.38678
		773.037	17			1329.09	10.9	1105.46	2.23724
		776.065	10			1333.62	15	1107.4	2.213
		779.092	22			1337.1	19	1109.35	2.91204
		781.494	12			1341.9	23.2	1111.09	2.04376
		783.629	18			1345.66	14.2	1112.73	2.06109
		785.763	7			1348.79	21.9	1114.38	2.15436
		787.897	0			1352.27	22	1115.94	1.98156
		790.032	6			1355.47	20.6	1117.44	2.10963
		792.166	0			1359.23	20.9	1118.95	1.58679
		793.653	1			1362.7	22.2	1120.52	1.5781
		794.974	7			1365.91	26	1122.2	1.82059
		796.295	0			1369.66	25.3	1123.89	1.44792
		797.617	4			1373.14	25.1	1125.65	1.37902
		798.938	0			1380.1	26.2	1127.56	1.29572
		800.26	5			1383.58	26.6	1129.47	1.43609
		801.581	0			1390.54	25.4	1131.55	1.43629
		802.903	0			1394.02	24.8	1133.69	1.02729
		804.224	0			1396.11	27.8	1136.02	0.959468
		805.545	3			1406.55	27	1138.62	0.981255
		806.867	6			1410.03	26.2	1141.38	0.889169
		808.188	19			1416.99	29.9	1144.33	0.96119
		809.51	2			1420.47	27.5	1147.8	0.965495
		810.831	0			1427.43	23.7	1151.38	1.26491
		812.153	20			1430.9	23.8	1161.11	0.929023
		813.474	20			1437.86	22.9	1163.73	0.876085
		814.806	5			1445.66	21.5	1165.97	1.03096
		816.899	20			1448.3	22.8	1167.84	1.20569
		818.993	37			1451.78	22.4	1169.72	1.74216
		821.086	38			1458.74	5.6	1171.33	1.34164
		823.179	13			1462.22	7	1172.89	1.62902
		825.272	26			1467.93	11.7	1174.45	1.84722
		827.365	20			1471.41	14.5	1175.92	2.05777
		829.458	21			1478.37	23.7	1177.34	2.09609
		831.552	0			1481.85	13.3	1178.76	1.83821
		833.645	8			1488.8	18.7	1180.24	1.84584
		835.738	25			1492.28	23.6	1182.17	1.96013
		837.831	12			1499.24	29.4	1184.1	1.94322
		839.924	12			1502.72	29.7	1186.31	1.58456
		842.018	1			1509.68	14.9	1188.77	1.53156
		843.588	7			1513.16	14.8	1191.48	1.90426
		845.088	27			1532.65	15.3	1194.43	1.56915
		846.587	9			1533	13.7	1197.67	1.9054
		848.087	14			1535.08	10.8	1200.95	1.6056
		849.586	14			1535.43	12	1204.15	1.56151
		851.086	0			1537.1	14.7	1206.49	1.64369
		852.585	0			1538.91	19.9	1208.51	1.85854
		854.085	11			1539.26	22.5	1210.25	1.78051
		855.584	8			1541.35	21.3	1211.21	2.21524
		857.084	12			1543.43	21.8	1212.17	1.87868
		858.583	34			1545.66	18.4	1213.12	1.67034
		860.083	20			1545.87	17.9	1214.05	1.82742
		861.582	19			1547.96	15.5	1214.98	1.51396
		863.082	1			1549.35	13.6	1215.75	1.21205
		864.581	29			1550.05	11.2	1216.5	1.37193
		866.081	15			1552.13	14.1	1217.25	1.27733
		867.281	18			1554.22	9.9	1217.98	1.48898
		868.381	18			1556.24	9.1	1218.71	0.952316
		869.482	25			1556.31	9.5	1219.43	1.09759
		870.582	43			1558.4	12.6	1220.22	0.963789
		873.884	7			1559.79	11.7	1221.37	1.28356
		874.984	1			1560.48	10.3	1222.51	1.25662
		876.084	2			1562.57	8	1223.63	1.62668
		877.185	6			1564.66	8.9	1224.74	1.44751
		878.285	0			1566.68	7.6	1226.44	1.46084
		879.386	5			1566.75	7.7	1228.31	1.40246
		880.486	3			1568.84	11	1230.21	1.20366
		881.587	3			1570.23	18.8	1232.75	1.58354
		882.687	3			1570.92	20	1235.24	1.54415
		883.788	1			1573.01	21.6	1237.44	1.66766
		884.888	10			1575.1	24	1239.62	1.34879
		885.988	4			1577.05	20.6	1240.78	1.89572
		887.089	2			1577.19	23.6	1241.71	2.13746
		888.189	0			1579.34	17.6	1242.64	1.9286
		889.29	19			1580.67	21.5	1243.56	1.68418
		890.39	17			1581.36	16.2	1244.46	1.93554
		891.491	0			1583.66	10.9	1245.19	2.17489
		892.591	4			1585.89	8.8	1245.67	1.96712
		893.691	29			1587.62	6.7	1246.14	1.79727
		894.792	15			1588.04	6.5	1246.6	1.94511
		895.892	7			1590.48	6.1	1247.07	1.89765
		896.993	13			1591.1	5.4	1248.91	1.55063
		898.093	13			1592.91	6	1249.37	1.56192
		900.26	25			1594.93	6.2	1249.83	1.6544
		902.958	17			1600.08	8.5	1250.47	1.84553
		905.655	18			1600.43	8.2	1251.21	1.67947
		908.353	37			1602.24	7.2	1251.95	2.05894
		911.051	26			1604.05	6.6	1252.7	1.5201
		913.749	19			1605.93	6.8	1253.45	1.91806
		916.447	4			1607.6	9.1	1254.2	2.27903
		918.143	12			1609.62	12.8	1254.95	2.14658
		919.348	8			1609.69	7.4	1256.42	2.40086
		920.554	7			1611.91	10.5	1257.95	2.35563
		921.76	2			1613.16	6.7	1259.49	2.29485
		922.966	0			1613.86	7	1260.95	2.3827
		924.171	1			1615.74	10.6	1262.36	3.00068
		925.377	4			1617.34	15.8	1263.78	2.15987
		926.583	15			1620.12	10.2	1265.12	2.52292
		927.788	4			1620.12	12.5	1265.88	2.41439
		928.994	9			1623.6	15.7	1266.66	2.47339
		930.2	11			1624.23	19.1	1267.44	2.38299
		931.405	21			1626.39	10.6	1268.23	2.32206
		932.611	0			1628.61	19.3	1269.04	2.27022
		933.817	8			1630.49	22.1	1269.85	2.32267
		935.023	17			1630.91	17	1270.54	2.05966
		936.228	7			1632.58	22.8	1271.2	2.1172
		937.437	28			1635.85	26.8	1271.87	2.84142
		939.317	6			1637.52	23.7	1272.56	2.59852
		941.196	28			1639.33	19.2	1273.25	2.14987
		943.076	40			1641	23.2	1273.96	2.8029
		944.955	36			1642.95	22.5	1274.67	2.3951
		946.835	41			1644.48	24.8	1275.61	2.21866
		948.714	35			1646.85	20.2	1276.74	3.03822
		950.593	35			1650.12	12.9	1277.89	2.09969
		952.473	33			1651.44	20.3	1279.06	3.26154
		954.352	31			1652.62	19.2	1280.39	2.87866
		956.232	26			1654.92	16.4	1282.3	2.73129
		958.111	33			1654.92	23.8	1284.24	2.5577
		959.854	14			1656.59	17.8	1286.28	2.75364
		961.122	20			1658.4	13.8	1288.38	3.07165
		962.391	1			1660	17	1290.33	2.84447
		963.66	7			1662.41	8.9	1291.73	2.59426
		964.928	12			1667.74	20.6	1293.15	3.67708
		966.197	7			1670.95	13.7	1294.6	2.57227
		967.466	29			1675.07	14.7	1296.38	3.2491
		968.734	6			1683.21	16	1298.3	2.67002
		970.003	15			1688.23	17.6	1300.32	2.07551
		971.272	20			1703.3	27.1	1302.74	2.66869
		972.606	21			1713.34	17.5	1305.21	2.63573
		973.999	13			1718.37	17.8	1307.76	2.13086
		975.393	14			1728.41	13.6	1310.29	2.38267
		976.786	27			1730.42	8.9	1312.5	1.93601
		978.18	5			1733.43	7	1314.76	2.16249
		979.573	26			1743.48	6.2	1316.42	2.08818
		980.967	5			1745.49	7	1318.03	1.99506
		982.36	17			1748.5	11.7	1319.68	2.28384
		983.754	22			1758.55	24	1320.99	1.97574
		985.147	35			1760.56	29.3	1322.23	1.33485
		986.541	18			1774.42	25.3	1323.5	1.71633
		987.934	23			1778.14	23.3	1327.24	1.52931
		989.328	20			1789.39	32.3	1328.48	1.5433
		990.721	34			1804.46	29.9	1329.74	1.38385
		993.19	32			1849.26	12.4	1330.91	1.50493
		995.928	11			1859.71	11.8	1333.22	1.82005
		998.665	8			1869.15	26.8	1335.83	1.93224
		1001.4	11			1875.48	8.6	1339.29	1.9467
		1004.14	19			1884.61	27.4	1342.37	1.57707
		1006.88	6			1894.06	36.5	1345.32	1.80072
		1009.62	16			1899.67	33.3	1347.88	1.53369
		1012.35	9			1917.2	28.7	1350.44	1.2798
		1014.9	32			1925.72	11.3	1352.92	2.09691
		1016.51	47			1938.22	16.5	1355.37	1.33412
		1018.12	23			1941.98	30.9	1357.63	1.57211
		1019.73	2			1943.83	16.4	1359.88	1.00301
		1021.35	25			1948.51	11.2	1362.03	1.06132
		1022.96	42			1951	24.5	1364.17	1.23547
		1024.57	24			1959.94	21.1	1366.06	1.05323
		1026.18	18			1971.09	29.8	1367.8	1.39548
		1027.8	36			1982.74	29.6	1369.52	1.84835
		1029.41	19			1991.47	23.5	1371.2	1.77407
		1031.02	8			1996.79	18.4	1372.86	1.98065
		1032.63	23			2002.47	20.8	1374.49	2.01164
		1035.86	17			2007.09	12.2	1378.48	1.99629
		1037.47	22			2007.58	18.5	1384.1	1.62842
		1039.08	34			2015.54	30.8	1389.7	1.90281
		1040.69	47			2020.93	31.6	1394.06	1.94357
		1042.31	47			2036.69	24.2	1397.41	1.65137
		1043.92	9			2044.79	30.2	1400.42	1.90244
		1045.53	15			2055.44	30.2	1403.25	1.60527
		1047.14	7			2144.12	7.5	1406.18	1.40835
		1048.76	2			2148.73	9.3	1409.3	0.935338
		1050.37	9			2159.31	17.1	1413.09	0.968782
		1051.98	3			2170.03	22.9	1417.51	0.987002
		1053.59	3			2180.75	24.2	1422.24	0.987345
		1055.21	3			2191.68	17.9	1426.62	1.3367
		1056.82	8			2202.33	10.6	1430.45	1.45318
		1058.43	26			2210.43	42.1	1433.33	1.39051
		1060.04	29			2213.2	24.2	1435.75	1.6808
		1061.66	47			2215.11	22.8	1442.7	1.25028
		1063.25	54			2215.47	21.9	1444.36	1.2959
		1064.84	29			2217.24	24	1446.42	1.58193
		1066.43	41			2219.37	22.6	1448.73	1.20293
		1068.02	39			2221.43	24.4	1451.53	1.5566
		1069.6	28			2223.49	17.1	1454.93	1.55045
		1071.19	24			2225.62	15.1	1458.7	1.00849
		1072.78	35			2226.62	19	1462.18	1.57341
		1074.37	30			2228.18	13.7	1465.36	1.15326
		1076.33	19			2230.66	15.3	1467.81	0.961732
		1078.54	36			2232.79	13.3	1470.2	0.961335
		1080.75	46			2234.99	16.1	1472.01	1.18757
		1082.96	26			2237.48	18.2	1473.83	1.20627
		1085.17	21			2239.89	18.4	1475.55	1.19271
		1087.38	20			2242.66	19.6	1477.09	1.26391
		1089.59	33			2245.08	20.2	1478.63	1.24554
		1091.8	25			2247.06	21.9	1480.17	1.20423
		1092.65	38			2249.41	24.1	1481.68	1.57803
		1093.5	14			2251.32	25.6	1483.19	1.30336
		1094.35	39			2254.23	29.2	1484.71	1.26008
		1095.21	18			2256.22	28.8	1486.66	1.48309
		1096.06	13			2258.42	30.3	1488.71	1.51721
		1096.91	39			2260.62	28.2	1490.9	1.71721
		1097.77	33			2262.83	27.7	1493.35	1.85414
		1098.62	17			2265.03	30.1	1496.01	1.94067
		1099.47	13			2266.16	35.6	1499.14	1.89676
		1100.67	22			2267.09	29.6	1502.49	1.9489
		1101.52	23			2269.14	29.8	1505.7	2.06906
		1102.38	6			2271.91	30.4	1508.29	1.8728
		1103.23	24			2274.68	29.5	1510.45	1.74086
		1104.11	22			2276.74	29.8	1511.79	1.90479
		1105.75	15			2278.8	30	1513.11	2.17661
		1107.39	20			2281.07	11.2	1514.44	2.13776
		1109.04	29			2281.43	11.5	1515.56	1.65843
		1110.68	33			2283.2	11	1516.53	2.08281
		1112.32	14			2284.98	13.3	1517.51	2.31522
		1113.97	20			2286.89	15.6	1518.48	1.86768
		1115.61	8			2288.74	30.3	1519.45	2.24884
		1117.25	49			2290.73	31.3	1520.58	1.83955
		1118.9	10			2290.73	32	1521.93	1.85862
		1120.54	5			2292.65	34.6	1523.28	2.04579
		1122.18	18			2292.65	40.4	1524.64	2.60125
		1123.83	16			2294.42	36.2	1526.28	2.53555
		1125.47	1			2294.42	42.8	1528.04	2.59482
		1127.11	16			2296.05	31.8	1529.8	2.10633
		1128.76	24			2297.83	28.5	1531.89	2.04827
		1130.4	0			2299.67	29.3	1534.04	1.79995
		1132.04	6			2299.67	29.4	1536.15	1.85528
		1134.11	3			2301.73	30.7	1538.24	2.34724
		1136.28	19			2303.58	30.1	1540.26	2.36568
		1138.45	10			2305.5	26.8	1541.82	2.19946
		1140.61	0			2305.5	27.1	1543.4	2.32015
		1142.78	15			2307.91	26.9	1544.99	1.96246
		1144.95	9			2310.47	28.1	1546	1.57222
		1147.12	6			2312.24	26.9	1547.01	1.69249
		1149.28	15			2314.02	21.2	1548.04	1.55692
		1150.98	28			2314.02	26.6	1549.07	1.68034
		1152.56	30			2315.86	23.7	1550.11	1.29665
		1154.14	13			2317.78	21.2	1553.17	1.19107
		1155.72	12			2319.48	19.8	1554.22	1.38363
		1157.3	15			2321.4	15.2	1555.41	1.26164
		1158.88	42			2321.4	15.4	1556.95	1.34843
		1160.46	12			2323.39	16	1558.51	1.43059
		1162.04	24			2325.16	20.4	1560.14	1.70051
		1163.62	21			2325.52	18.7	1562.73	1.57616
		1165.2	24			2325.52	19.2	1565.45	1.91325
		1166.78	28			2330.35	21.9	1568.98	1.65038
		1168.36	13			2332.19	25.1	1572.41	1.6992
		1169.94	21			2333.97	26	1575.69	1.43521
		1171.52	24			2333.97	27	1578.54	2.09592
		1173.1	16			2335.81	26.8	1581.05	1.48521
		1174.68	8			2335.81	27.8	1583.2	1.57538
		1176.26	7			2337.59	21.2	1585.3	1.48186
		1177.84	9			2337.59	25.5	1587.15	1.37648
		1179.42	15			2339.43	25.5	1588.99	1.37473
		1181	13			2341.21	23.6	1590.91	1.21396
		1182.58	16			2342.98	26.1	1592.91	1.35464
		1184.15	18			2344.69	21.3	1594.89	1.39765
		1185.73	9			2347.39	21.5	1597.07	0.86617
		1187.31	11			2350.08	20.4	1599.24	1.00187
		1188.89	9			2352.5	18.8	1600.38	1.109
		1191.1	7			2355.69	13	1602.58	1.07538
		1194.78	5			2358.6	8	1604.77	1.37365
		1198.46	10			2360.59	7.1	1606.98	1.14197
		1202.13	7			2364.85	7.3	1609.18	1.07012
		1205.81	10			2366.98	6.4	1611.57	0.980087
		1209.49	16			2369.11	7.7	1614.06	1.1172
		1213.16	10			2371.45	7	1616.73	1.13657
		1215.66	8			2374.15	6.9	1619.48	0.795357
		1216.98	13			2376.57	7.2	1622.51	1.0088
		1218.29	4			2380.04	13.8	1625.56	1.04768
		1219.61	0			2382.1	12.2	1628.51	1.28227
		1220.93	0			2384.3	15.4	1631.11	1.08291
		1222.25	7			2386.36	9	1633.37	0.801596
		1223.56	8			2388.64	5.4	1635.45	0.876573
		1224.88	4			2390.84	3.6	1637.09	0.869709
		1226.2	13			2393.68	4.6	1638.7	1.27329
		1227.51	30			2394.74	8	1640.18	1.30558
		1228.83	34			2395.88	7.3	1641.19	1.10438
		1230.15	39			2397.94	12	1642.18	1.67845
		1231.47	40			2400.21	16.3	1643.15	1.98004
		1232.78	44			2402.34	15.1	1644.1	2.06351
		1234.1	49			2404.82	11	1645.04	1.98484
		1235.42	43			2409.72	28	1645.89	2.11666
		1236.74	44			2409.72	28.1	1646.73	2.33396
		1238.05	37			2411.78	26.4	1647.56	2.89317
		1239.37	45			2413.77	26.8	1648.38	2.9474
		1240.69	43			2415.76	25.9	1649.19	2.35019
		1242	24			2417.74	24.9	1649.99	2.1516
		1243.32	25			2419.73	24.8	1650.88	2.63961
		1244.64	13			2421.65	25.8	1651.77	2.46927
		1245.76	2			2423.64	24.9	1652.65	2.85965
		1246.83	10			2430.1	26.2	1653.52	2.83466
		1247.91	6			2432.16	24.2	1654.4	1.60648
		1248.98	6			2434.36	24.2	1655.26	1.8998
		1250.05	17			2436.49	22.7	1656.11	2.1935
		1254.34	17			2438.83	17.7	1656.95	1.81729
		1255.42	12			2441.6	24	1657.8	1.68562
		1256.49	0			2443.66	28.4	1658.66	1.45062
		1257.56	2			2445.79	29.7	1659.51	1.55132
		1258.63	0			2450.48	23.4	1660.38	1.5213
		1259.71	0			2452.75	25	1661.27	1.37934
		1260.78	0			2454.88	23	1662.16	1.50223
		1261.85	4			2457.22	21.4	1663.07	1.77106
		1262.93	4			2457.22	21.4	1663.98	1.75838
		1264	1			2459.21	22.5	1664.9	1.36944
		1265.07	11			2461.13	23.5	1668.81	1.53454
		1266.14	22			2464.25	20.6	1670.24	1.54567
		1267.22	26			2467.23	21.7	1672.27	1.41311
		1268.29	10			2469.22	20.8	1674.32	1.68025
		1269.36	32					1676.77	1.35367
		1270.44	20					1679.43	1.18712
		1271.51	10					1682.06	1.41831
		1272.58	23					1684.72	1.13506
		1273.65	29					1686.95	1.15908
		1274.73	33					1689.17	0.925123
		1275.8	9					1690.89	0.903138
		1276.87	20					1692.33	0.987408
		1277.95	10					1693.79	1.1253
		1279.02	11					1695.23	1.07965
		1280.09	10					1696.47	0.970752
		1281.16	13					1697.74	1.08291
		1282.24	4					1699.02	1.17737
		1283.31	9					1703.07	0.938839
		1284.38	14					1706.6	1.38068
		1285.46	6					1708.5	1.19092
		1286.81	5					1710.58	0.746023
		1288.17	0					1713.22	1.0221
		1289.53	8					1715.87	0.933725
		1290.89	1					1718.53	1.20505
		1292.25	4					1721.61	1.08905
		1293.61	10					1725.23	1.22833
		1294.97	4					1729.15	1.02233
		1296.33	7					1732.69	0.977419
		1297.69	9					1735.93	1.11421
		1299.05	13					1738.76	0.840966
		1300.41	14					1741.22	0.882383
		1301.77	21					1743.38	0.667411
		1303.13	13					1745.55	0.963077
		1304.49	36					1747.77	1.3678
		1305.85	18					1749.98	1.03799
		1307.22	17					1752.24	1.04662
		1308.58	10					1754.49	1.10569
		1309.94	37					1757.03	1.30694
		1311.3	20					1759.64	1.35571
		1312.66	30					1762.07	1.81578
		1314.02	14					1764.46	1.59071
		1315.38	26					1766.62	1.86647
		1316.74	12					1768.7	1.55027
		1318.1	14					1770.63	1.93312
		1319.46	3					1772.3	1.6878
		1320.82	10					1773.94	1.75133
		1322.26	10					1775.56	1.52666
		1323.71	0					1777.14	1.27113
		1325.16	8					1778.71	1.3311
		1326.6	12					1780.25	1.39521
		1328.05	0					1781.74	1.20308
		1329.5	12					1783.22	1.07401
		1330.95	4					1784.7	0.873389
		1332.39	16					1786.16	1.19213
		1333.84	27					1787.61	0.979132
		1335.29	32					1789.07	1.03535
		1336.73	24					1790.61	0.743034
		1338.18	34					1797.82	1.09761
		1339.63	42					1799.89	1.12693
		1341.08	38					1802.28	1.10148
		1342.52	27					1804.73	0.937945
		1343.97	27					1807.22	1.13603
		1345.42	27					1809.76	0.77239
		1346.86	20					1812.08	0.831633
		1348.31	22					1814.42	0.86023
		1349.76	23					1816.45	0.906769
		1351.2	28					1818.42	1.03048
		1352.65	10					1820.4	0.936349
		1354.1	14					1822.3	1.07234
		1355.55	17					1824.25	1.2242
		1356.99	10					1826.39	0.904151
		1358.44	27					1828.67	1.02255
		1361.33	8					1830.76	1.03681
		1362.78	8					1832.57	1.12153
		1364.53	13					1834.4	1.19876
		1366.33	3					1836.74	1.03597
		1368.13	11					1839.34	1.07112
		1369.93	20					1844.21	0.861481
		1371.73	26					1850.27	0.726362
		1373.53	39					1855.86	1.13852
		1375.33	35					1860.73	1.06942
		1377.13	21					1864.52	1.20722
		1378.93	33					1867.42	1.39537
		1380.73	35					1870.13	1.83349
		1382.53	38					1871.91	1.65609
		1384.33	12					1873.69	1.61425
		1386.13	37					1875.35	1.65423
		1387.94	28					1876.66	1.57868
		1389.74	25					1877.98	1.63685
		1391.54	14					1879.3	1.86613
		1393.34	14					1880.74	1.51471
		1395.14	26					1882.31	1.48732
		1396.94	30					1883.88	1.73667
		1398.74	35					1885.89	1.80499
		1400.54	34					1889	1.63972
		1402.34	27					1892.92	1.6045
		1404.14	37					1897.14	1.66358
		1405.94	35					1900.97	1.41338
		1407.74	36					1904.09	1.38188
		1409.18	56					1906.54	1.11996
		1410.51	18					1908.71	1.38782
		1411.84	30					1910.63	0.966096
		1413.18	19					1912.2	1.16339
		1414.51	4					1913.74	1.2471
		1415.84	30					1915.26	1.606
		1417.17	15					1916.77	1.19351
		1418.51	20					1918.25	1.17582
		1419.84	26					1919.7	0.969831
		1421.17	65					1921.44	1.06727
		1422.5	56					1923.22	1.03538
		1423.84	43					1924.98	1.12663
		1425.17	52					1927.03	1.28601
		1426.62	60					1929.05	1.26414
		1428.36	49					1931.19	1.15161
		1430.09	55					1933.43	1.19244
		1431.83	38					1940.34	1.31454
		1433.57	29					1942.68	1.19765
		1435.31	34					1945	1.55183
		1437.05	40					1946.7	1.28606
		1438.78	34					1948.4	1.55368
		1440.52	42					1950.06	1.30691
		1442.26	39					1951.16	1.49203
		1444	36					1952.27	1.18813
		1445.74	27					1953.39	1.53073
		1447.47	40					1954.5	1.31639
		1449.21	35					1955.48	1.11737
		1450.95	28					1956.35	1.09141
		1452.49	5					1957.23	1.26242
		1453.29	11					1958.11	1.12888
		1454.09	0					1959	1.48715
		1454.89	0					1959.9	1.28852
		1455.68	0					1961.07	1.19016
		1456.48	2					1962.28	1.33073
		1456.8	0					1963.5	1.42443
		1457.6	5					1964.73	1.51918
		1458.4	0					1966.02	1.63227
		1458.88	0					1967.33	1.68052
		1459.67	0					1968.64	1.77129
		1460.47	0					1969.96	1.50157
		1461.27	0					1971.22	1.6686
		1462.07	15					1972.48	1.61766
		1462.87	17					1973.74	1.68599
		1463.66	7					1975	2.48726
		1464.46	30					1976.39	2.37682
		1465.26	40					1977.77	2.09286
		1466.06	47					1979.15	2.06557
		1466.86	50					1980.51	2.56486
		1467.65	44					1981.84	1.85286
		1468.45	62					1983.16	1.86415
		1469.31	41					1984.48	1.89165
		1471.27	65					1985.71	2.21965
		1473.23	57					1986.89	2.08082
		1475.19	58					1988.06	2.34273
		1477.15	58					1989.22	2.04867
		1479.11	6					1990.41	1.57052
		1481.07	82					1991.69	1.65348
		1483.03	83					1992.96	1.55099
		1484.99	79					1994.22	1.32054
		1486.95	76					1995.59	1.55562
		1488.91	64					1997.16	1.67472
		1490.87	59					1998.71	1.40126
		1492.83	38
		1494.52	39
		1496.04	45
		1497.55	37
		1499.07	10
		1501.2	19
		1502.71	14
		1504.23	40
		1505.75	4
		1507.27	40
		1508.78	26
		1510.47	50
		1512.82	30
		1515.16	32
		1517.51	31
		1519.86	47
		1522.2	26
		1524.55	37
		1526.89	48
		1529.24	28
		1531.58	41
		1533.35	23
		1535.11	13
		1536.88	21
		1538.65	10
		1540.42	5
		1542.18	19
		1543.95	22
		1545.72	0
		1547.48	20
		1549.25	35
		1551.02	32

## Sheet: Diatom
MD2-2588 Age (ka)	Diatom Abundance (106 g-1)	PS58/254-1 Age (ka)	Diatom Abundance (106 g-1)
1.43	3.59339	27.494	1.0059
5.03	3.59339	40.75	2.6673
8.39	4.36341	54.006	3.1548
12	3.08922	67.262	1.2139
15.48	1.81503	78.942	11.3934
17.95	1.00102	90.288	12.9644
21.49	8.43347	101.635	28.0129
25.54	4.12507	112.981	22.7918
28.52	9.49682	124.327	18.6433
30.79	8.25014	132.243	19.593
36.29	4.73008	136.728	1.5928
41.98	5.09675	141.213	0.0636
45.53	7.44346	145.699	0.4196
49.08	2.71338	150.184	0.081
52.62	2.81727	154.669	0.1173
56.17	2.80505	159.154	0.0699
59.72	3.58423	163.64	0.0187
63	4.3084	168.125	0.0111
65.66	12.5035	172.61	0.0483
68.33	9.51516	177.096	0.0632
70.98	3.36422	181.581	4.7602
73.61	2.59727	186.066	5.6404
76.25	1.75086	190.551	15.4853
78.89	2.6706	194.545	9.5117
81.53	2.51171	198.485	12.9009
84.16	1.88836	202.424	13.5828
87.07	1.12202	206.364	30.0741
90.6	1.66836	210.303	38.21
94.13	2.2917	214.242	34.9686
97.67	1.03768	218.182	26.0585
101.2	0.98085	222.121	22.7918
104.73	1.01568	226.061	12.9644
108.26	1.33835	230	18.0429
111.79	5.7717	233.939	25.6352
115.33	1.7967	237.879	33.0657
118	1.33102	241.818	20.3055
121.8	0.999183	248.955	2.1593
125.04	1.65461	257.463	1.1083
128.28	1.72795	265.97	2.2741
131.52	3.39172	274.478	2.0495
134.74	0.647789	282.985	23.5764
137.95	0.892237	291.493	29.0647
141.17	2.44754	300	26.142
144.38	1.7967	304.458	28.3846
147.59	2.16337	308.916	43.0253
150.8	2.1817	313.373	33.5029
154.02	1.14891	317.831	30.1719
157.23	3.99673	322.289	27.8735
160.36	4.69341	326.747	34.2366
166.57	3.58423	331.205	30.234
169.67	5.20675	335.663	12.1391
172.77	2.49337	340.12	3.9942
175.87	3.42839	344.578	1.0685
178.97	3.74006	349.036	1.5869
182.08	5.17009	353.494	0.1858
185.18	3.15339	357.952	0.6727
189.42	1.26044	362.41	4.7885
193.78	2.67671	366.867	11.1678
198.15	1.83336	371.325	17.5661
202.52	0.490425	376.174	22.7076
206.5	1.18435	381.609	35.1323
211.25	0.843347	387.043	37.2886
215.62	0.759013	392.478	31.2803
219.6	0.562232	397.913	25.9289
223.41	0.366673	403.348	17.2101
227.21	0.608066	408.783	22.4475
231.02	0.317783	414.217	16.0605
234.83	0.360562	419.652	5.6026
238.64	0.861681	424.74	0.7098
242.45	2.87227	428.438	1.5498
246.26	0.381951	432.137	0.1914
250.07	1.22835	435.836	0.2118
253.88	2.56671	439.534	0.1264
257.69	2.66449	443.233	0.1003
261.5	0.446882	446.932	0.1096
265.31	0.699297	450.63	0.249
269.12	1.58128	454.329	0.1394
272.93	3.63006	458.027	0.4831
276.73	3.43756	461.726	0.3531
280.54	2.93338	465.425	0.8734
284.35	1.41627	469.123	0.2787
288.16	1.2971	472.822	0.4999
291.23	1.80128	476.521	3.2317
293.53	2.96088	482.074	9.8996
295.9	1.65461	488.864	16.1586
298.23	1.04135	495.654	28.1058
300.56	1.02668	502.444	19.8864
302.89	0.566306	509.235	13.5226
305.22	0.498064	516.025	15.375
307.56	0.733346	522.815	18.9918
309.89	2.22295	529.605	21.1068
312.22	1.04502	546	13.2481
314.55	0.644733	567	25.3546
316.88	0.37584	575	13.5007
319.22	1.35058	583	13.5898
321.55	1.22835	587.368	20.0424
323.88	0.467508	591.736	19.8864
326.21	0.305561	596.103	22.8563
328.54	1.53636	600.471	13.4012
330.87	1.70044	604.839	6.8743
333.21	2.02587	609.207	8.7831
335.54	1.16969	613.575	4.9198
337.87	0.531676	617.943	2.2745
340.2	0.336117	621.912	0.1821
342.53	2.0167	624.95	0.0297
344.87	1.16113	627.989	0.0353
347.2	1.01935	631.028	0.0669
		634.066	0.0174
		637.105	0.0203
		640.144	0.0154
		643.182	0.0058
		646.221	0.0039
		649.26	0.0039
		652.298	0.0039
		655.337	0
		658.376	0.0058
		661.414	0.0029
		664.453	0
		667.492	0
		670.53	0.0096
		673.569	0.0039
		677.108	0.2661
		682.646	0.914
		688.185	0.9565
		693.723	2.6011
		696	7.4895
		701.467	0.7868
		706.933	0.0231
		712.4	0
		717.867	0
		723.333	0
		728.8	0
		734.267	0.0039
		739.733	0.0029
		745.2	0.1504
		750.667	0.5708
		756.133	0.0694
		761	0.8986
		764.167	1.1686
		767.333	1.9245
		770.5	6.0498
		773.667	1.3383
		776.833	0.3278
		790	0.2179
		814	0.3066
		827	0.5091
		840	0.0939
		853	0.0463
		866	0.0251
		870.667	0.0039
		875.333	0
		880	0
		884.667	0.0039
		889.333	0.0014
		894	0
		898.667	0
		903.333	0.0019
		908	0
		912.667	0
		917.333	0.0019
		922	0
		926.667	0
		931.333	0
		936	0.4823
		947.5	0.7771
		959	0.9121
		964.5	0.0656
		970	0.5187
		976	0.2198
		982	0.0983
		1008	0.081
		1026	0
		1044	0.0482
		1062	0.8256
		1064.67	0.8118
		1067.33	0.3317
		1075.5	0.1176
		1081	0.027
		1111	0.0019
		1141	0.1157
		1165.5	0.5399
		1190	0.0135
		1200	0.0039

## Sheet: element ratios
TT013-114 Age(ka)	Ba/P	TT013-18 Age(ka)	Ba/P	TT013-72 Age(ka)	Ba/P	TT013-32 Age(ka)	Ba/P	ODP 1123 Age(ka)	Ba/Al
7.6	6.52273	1.963	4.67181	2.738	3.74874	2.77	1.59874	1	0.0222531
11.4	8.65611	3.96	5.15566	5.106	4.03073	8.31	2.04207	2	0.0209786
15.2	10.2177	6.021	3.86441	7.203	3.55525	12.466	4.14458	4	0.023686
19	6.58209	8.183	4.24479	9.125	4.35211	16.621	3.23383	6	0.0270412
22.8	6.93452	10.511	4.56216	10.917	5.20259	20.776	4.3007	9	0.0290823
26.6	6.33708	13.134	3.91949	12.608	3.99369	29.086	3.15337	10	0.0222762
30.4	8.63478	15.757	4.65957	14.229	3.85423	33.242	5.24561	12	0.0212159
34.2	5.6443	18.727	4.56436	15.802	4.32721	54.018	4.67241	14	0.0203256
38	6.76106	21.978	2.85959	17.351	4.17978	58.173	1.70155	16	0.0182008
41.8	5	25.415	5.48921	18.9	4.75214	70.638	1.66366	19	0.0174074
45.6	7.47706	28.885	3.38095	20.479	2.74202	74.794	1.64589	21	0.0149623
49.4	7.09701	32.217	4.50685	22.115	3.14407	78.949	2.85425	22	0.016543
53.2	4.97647	35.293	2.875	23.852	2.89548	83.104	2.38799	25	0.0170766
56.5	5.77019	38.059	4.84252	25.744	2.69789	87.259	1.25198	26	0.0147331
59.5	6.04831	40.524	3.65482	27.86	2.59697	91.414	6.48069	29	0.015752
62.5	7.7085	42.736	2.29658	30.315	2.83505	99.725	2.68005	32	0.0148669
65.4	10.6352	44.76	5.35075	33.219	3.2439	103.88	4.62222	33	0.0173303
71.6	7.90323	46.651	2.91353	36.621	2.58982	106.904	2.66759	35	0.0183645
80	11.1241	50.631	3.78771	40.298	3.94089	114.162	6.01667	36	0.0187381
88.3	10.5947	52.468	2.57333	47.19	2.90747	115.977	2.80392	38	0.0171778
96.7	12.0258	54.399	3.3369	50.152	2.20833	120.211	2.94306	40	0.0172979
113.4	10.9049	56.482	2.36429	52.786	2.76894	125.05	2.68796	43	0.018051
121.7	8.7953	58.787	2.83333	55.163	2.89963	131.098	2.7476	46	0.0199472
130.1	7.68584	61.382	3.53287	57.37	2.83276	134.122	4.94792	47	0.0186224
138.4	6.43005	64.337	7.57225	59.494	3.98367	143.195	3.12715	49	0.0198656
145	6.52764	67.684	5.72043	61.599	3.98077	146.219	6.94118	51	0.0222523
148.7	6.06103	71.377	5.03261	63.739	3.75983	149.243	1.85398	52	0.0203306
152.5	7.96648	75.342	6.04098	66.047	4.03607	152.268	7.58015	55	0.0222581
156.3	10.0267	80.135	4.36747	68.355	4.95911	155.292	2.4127	57	0.0207222
160.1	6.81967	86.641	7.82174	70.963	6.07692	158.316	2.44106	61	0.0178986
163.8	5.94561	92.172	6.70144	73.883	4.23372	167.389	2.2166	63	0.0175658
167.6	9.16972	101.064	5.50476	77.179	4.54279	170.413	3.98664	65	0.0168035
171.4	14.1152	105.371	5.49091	80.89	5.13607	179.486	4.33569	67	0.0166955
175.2	13.3697	110.324	6.41049	85.028	6.1186	182.51	3.98545	69	0.0183924
178.9	9.82441	116.359	6.46319	89.54	5.97921	194.778	4.11681	71	0.0190349
191	11.2429	121.62	4	94.3	5.84975	200.912	2.36127	74	0.0193803
205.1	8.46921	126.271	5.38889	99.145	5.05034	207.046	2.64859	76	0.0172508
219.2	11.7299	128.977	5.26482	103.88	5.27632	213.18	3.88352	80	0.0175556
233.3	7.24623	131.817	6.66887	108.318	5.75385	219.314	2.22674	83	0.0182955
247.4	6.68208	134.182	4.72038	112.369	6.37204	225.448	2.44689	85	0.018288
259.3	9.92982	136.242	3.59286	116.036	6.08667	231.582	4.52096	88	0.016675
262.2	9.18831	138.216	3.74558	119.365	4.68421	237.716	2.19676	91	0.02
265.1	10.7957	140.246	4.00394	122.417	4.43719	243.85	2.15543	95	0.0215576
268	15.9887	142.444	4.24473	125.469	4.22462	249.984	2.41808	97	0.021465
271	10.2763	144.888	4.10288	128.433	3.99437	256.118	2.52964	101	0.0210227
277.9	12.8289	147.594	3.92336	131.421	5.36226	262.252	3.48004	103	0.0192754
286	9.43632	153.52	4.29046	134.427	4.35621	268.386	2.31047	106	0.0199437
294	11.0819	156.41	3.77778	137.382	4.63287	274.52	2.08986	109	0.0195349
302	10.9708	159.014	3.26888	141.844	4	283.281	2.66641	112	0.0237942
310	11.1416	163.366	3.43866	144.422	3.32898	318.326	2.22566	115	0.0265385
326	13.2233	165.306	6.77037	146.849	4.62458	327.087	4.05427	117	0.0254355
334	6.95322	167.337	4.65702	149.137	4.13861	344.61	3.21257	121	0.0240199
342	7.66225	169.367	5.51709	151.314	3.19519	362.132	4.04691	124	0.0256569
350	8.7933	171.979	4.05412	153.403	4.29032	370.894	2.1849	126	0.0307732
358.1	10.7063	175.483	4.92857	155.423	4.13231	379.655	2.61008	129	0.0319068
366.1	14.6899	180.076	5.79701	157.375	3.86405	388.416	3.67765	132	0.0292701
374.1	13.6567	184.841	7.87668	159.252	3.15181	393.483	2.53415	134	0.0231788
382.1	11.4674	189.088	7.12313	161.043	3.4064	398.55	3.71557	136	0.0224333
388.4	10.2874	194.035	5.09598	162.745	3.27088	411.425	3.72141	139	0.0238521
392.1	9.44191	204.036	5.88148	164.384	2.95157	417.863	1.98267	143	0.0220761
395.8	9.43828	215.173	4.28165	165.989	3.35567	424.3	4.18491	144	0.0220351
399.5	7.91085	219.562	5.125	167.596	3.13938	437.175	4.28413	146	0.0219113
403.2	5.74269	221.956	5.23154	169.244	3.9525	443.613	1.6934	149	0.0229412
409.1	7.49123	224.349	5.63376	170.971	4.01057	462.925	5.28782	151	0.0216054
423.5	6.21711	227.39	5.1102	172.829	4.88393	469.363	3.38068	153	0.0199363
437.9	5.80263	231.892	6.05587	174.854	5.57219	475.8	4.63464	156	0.018997
452.3	6.11364	237.563	2.35522	177.098	6.9635	484.106	4.56948	159	0.0201502
464.4	11.8333	245.891	2.67823	179.624	5.8185	500.718	2.02814	161	0.0206857
467.6	8.10759	248.606	3.3682	182.511	6.26941	509.023	1.62562	164	0.0233887
470.7	10.512	250.968	5.22819	185.907	5.14187	525.635	4.4	166	0.0225387
473.9	8.9879	253.206	3.38579	190.028	4.23724	533.941	1.74067	169	0.0183938
477	15.7967	255.512	2.825	194.889	4.472	542.247	7.728	171	0.0191143
481.4	8.57793	258.038	4.88776	199.554	5.40732	550.553	4.8151	174	0.0197264
487.5	9.53358	263.634	3.69565	203.498	4.6036	558.858	4.72704	176	0.0184211
493.7	10.3089	266.432	4.35204	207.091	5.06757	567.164	4.27966	179	0.0174115
499.9	8.72941	269.012	4.23171	210.516	3.85604	575.47	6.15658	182	0.0165618
506	6.2303	271.246	4.72097	213.777	4.1191	578.825	5.34526	184	0.0172506
512.2	7.05769	273.082	4.97159	216.855	4.13064	582.181	3.56379	186	0.0195594
518.3	7.71014	273.555	4.4	219.779	4.38916	585.536	3.06824	189	0.0187568
524.5	8.90654	274.028	5.84615	222.603	5.93734	588.891	7.38776	191	0.0176656
533.9	9.4466	274.42	5.34545	225.396	3.98121	592.247	5.905	193	0.017412
544	10.5839	274.812	4.66254	228.233	4.57182	595.602	8.4	195	0.0158925
554.2	14.7559	275.449	4.76923	231.205	3.69337	598.957	3.30124	198	0.0185277
564.4	9.17241	278.108	4.26165	234.427	3.41611	605.668	2.38719	201	0.017552
574.6	14.0302	282.646	5.5906	238.024	2.61628	612.379	1.90854	202	0.0163484
576.6	14.6653	296.82	5.21728	242.059	3.27445	615.734	2.22368	206	0.0182713
578.6	10.0489	322.272	3.26721	246.245	3.41083	619.089	1.05	208	0.0188251
580.7	15.1308	327.829	3.08297	250.055	4.83178	632.511	5.11111	211	0.0200267
582.7	8.00797	331.752	1.98718	253.286	2.74719	639.221	1.64865	213	0.0238506
603.6	9.4	335.565	1.6466	255.913	2.32446	652.643	1.72426	215	0.0232867
613.9	8.57416	340.04	2.76538	258.539	3.34202	666.064	1.8151	218	0.0210149
621.5	7.5137	344.523	3.52055	260.831	2.71867	669.419	2.02073	220	0.017618
629.1	6.33094	348.364	4.9557	263.02	3.00803	676.13	1.9687	223	0.0167081
636.7	7.73118	351.613	2.61842	265.183	3.44892	681.849	11.0719	225	0.0181057
644.2	4.71429	354.862	2.16766	267.345	4.23922	687.568	3.34356	227	0.0217011
651.8	5.0625	356.45	2.57037	269.59	4.62375	690.428	4.08253	230	0.0219091
659.4	5.02609	357.248	1.372	271.959	4.47257	693.842	4.71364	231	0.0212065
667	3.89404	357.636	2.18954	274.527	4.85788	697.256	8.2	235	0.0219753
672.1	4.75701	358.36	2.42308	277.352	4.69053	704.085	2.01587	237	0.021619
673.6	6.4086	358.787	3.48	280.517	3.63061	707.499	3.18687	239	0.0209333
675.1	4.2	359.817	2.26996	284.077	4.1734	710.914	3.33854	242	0.0197205
676.6	5.09286	360.847	3.90291	288.069	3.99391	714.328	1.93352	244	0.0237127
678.1	6.06329	362.616	3.3871	292.488	4.16591	721.157	2.38919	246	0.0233418
679.5	8.22059	364.385	4.23826	297.356	4.10784	734.814	1.23208	248	0.0207674
681	8.832	366.709	4.08798	302.712	3.77193	741.642	1.40141	250	0.0239189
682.5	9.10059	368.348	5.50215	308.207	3.778	751.885	3.46809	252	0.0242486
684	11.9636	370.271	5.03082	311.199	4.02752	755.3	3.80905	254	0.0210174
687.3	11.4041	372.952	3.28614	315.591	4.79534	758.714	4.8453	256	0.0190674
691.8	12.395	377.08	4.33442	319.982	5.57317	762.128	1.87365	258	0.0176562
696.4	8.02875	382.643	4.76538	322.712	4.80488	768.957	5.47126	260	0.0155929
700.9	7.76923	387.77	3.95362	325.185	5.1051	779.2	6.75482	261	0.0129181
705.4	7.4	391.688	5.68932	327.493	3.23292	785.425	3.05994	264	0.0132432
710	9.7	395.153	4.6697	329.706	2.75872	791.649	3.19077	266	0.0163226
714.5	5.73154	399.415	4.78353	331.873	4.30579	810.323	1.38209	269	0.0165772
719.1	12.4257	404.909	6.66027	334.056	3.76496	822.772	2.4893	275	0.0194798
724.4	5.98788	410.868	3.26791	336.239	2.47841	835.221	2.94988	276	0.0191594
730.3	6.64567	416.045	3.51754	338.516	2.02865	841.445	3.16245	280	0.0217489
736.2	9.50847	420.214	3.8587	340.908	2.91718	847.67	7.44665	282	0.0225243
742.1	11.1897	423.769	3.405	343.464	2.71839	852.457	3.02427	284	0.0209479
748	5.02679	426.93	2.5625	346.215	2.82584	857.244	7.01403	286	0.0164706
753.9	5.35849	430.055	3.82166	349.188	2.36712	862.977	3.59877	288	0.0206167
759.8	7.96117	436.186	2.76636	352.363	2.61111	868.71	7.84127	290	0.0198444
765.7	5.37572	439.375	2.41667	355.661	2.70748	874.443	5.33091	291	0.0183032
771.6	5.17734	442.39	2.7931	358.966	3.10726	880.176	2.00633	293	0.017234
777.5	8.37436	445.206	4.26797	362.176	4.08599	885.909	8.12613	295	0.0203459
783.4	8.74497	447.609	3.61979	365.249	2.94989	891.642	4.16667	297	0.0184615
789.3	9.2521	449.709	1.98058	368.194	3.65854	903.108	2.18605	299	0.0145565
795.2	6.3913	451.313	2.27803	371.048	3.91845	908.841	2.9065	301	0.0235169
801.2	8.24194	452.916	2.70244	373.859	3.84	914.574	2.875	303	0.0245498
807.1	8.34783	454.2	3.07009	376.678	3.41288	920.307	5.61395	305	0.0270899
813	6.27419	455.445	4.36905	379.546	3.60768	923.2	8.22297	307	0.0225301
818.9	7.5641	456.625	3.38976	382.481	3.95508	926.686	3.02506	309	0.0220657
824.8	11.6729	457.923	3.52466	385.457	5.05482	930.451	5.04762	311	0.0227835
830.7	8.93627	459.454	3.41121	388.394	4.08176	934.215	5.70419	313	0.0208612
836.6	9.72487	461.563	3.51383	391.2	4.72581	937.98	5.77134	315	0.0201887
842.5	12.0177	464.733	4.08714	393.824	5.23493			317	0.0188722
854.3	11.4596	469	4.61435	395.86	5.60694			319	0.0207885
866.1	9.97426	472.253	5.07692	398.559	6.02609			321	0.0223571
872	6.30769	475.506	3.81693	404.349	4.72611			323	0.0222559
877.9	5.73711	477.419	3.84454	407.528	4.44722			325	0.0157857
883.8	6.29508	479.05	4.77866	410.886	4.88926			327	0.0222407
889.7	8.28205	480.749	4.32353	414.367	4.41569			329	0.022963
897.1	7.83598	483.007	3.54252	417.867	3.03459			331	0.0211828
906.9	7.2	490.468	3.73504	421.245	3.37657			333	0.0189492
916.7	5.89404	497.929	4.1435	424.396	2.49836			335	0.0250204
926.4	9.15625	507.521	3.51903	427.266	2.60339			337	0.0219881
929.7	9.65591	512.131	3.52308	429.883	3.44843			339	0.0213774
931.3	8.33333	519.158	2.29412	432.246	2.94355			341	0.0197465
932.9	9.58784	520.82	2.54183	434.405	2.25472			343	0.0167269
934.5	6.32411	523.844	3.00543	436.404	3			345	0.0199331
936.1	11.3985	525.355	3.53049	438.268	3.33161			347	0.0206569
937.7	18.2944	526.963	2.53414	439.98	3.57353			349	0.0198507
939.4	12.9226	528.781	3.82514	441.691	3.15918			351	0.0194218
		530.941	4.14439	444.882	3.58079			353	0.0192814
		533.682	3.84358	446.439	2.23322			355	0.0171117
		537.241	2.85915	447.695	3.12195			357	0.016875
		541.732	5.07299	449.578	2.60289			359	0.0166962
		546.869	4.29717	451.198	2.78082			361	0.0167246
		552.536	3.01719	452.88	2.71988			363	0.0184983
		558.473	3.68621	454.648	4.4329			365	0.0163043
		564.402	9.22951	456.514	3.42745			367	0.0182392
		570.04	4.70566	458.488	3.12075			369	0.0179495
		575.064	4.69307	460.561	3.91519			371	0.0182772
		579.259	5.32367	462.702	4.12715			373	0.020535
		585.52	3.83333	464.874	3.10053			375	0.018
		588.65	4.38647	467.044	3.50483			377	0.019368
		591.489	4.38655	469.204	5.47785			379	0.0198785
		594.539	4.85	471.364	5.8303			381	0.0228079
		597.849	3.71787	473.552	5.97876			383	0.0234896
		601.247	4.69333	475.802	5.78344			385	0.0220904
		604.533	3.53597	478.16	5.1799			387	0.0231034
		607.689	4.58051	480.685	6.55936			389	0.0213725
		610.81	4.29478	486.557	3.44056			391	0.022218
		614.081	4.73077	488.347	2.78205			393	0.0230864
		617.667	2.38411	490.137	3.3207			395	0.0231492
		621.728	2.45255	494.36	3.18506			397	0.0213736
		630.645	4.9771	499.311	4.02465			399	0.0214917
		634.696	2.5434	504.386	3.34535			401	0.0216185
		637.495	8.20225	509.461	2.96667			403	0.0233898
		640.295	3.04192	513.191	2.68322			404	0.0274684
		643.094	3.88757	516.125	3.26733			407	0.0415455
		645.002	4.18065	518.577	2.62242			409	0.042069
		646.684	2.24783	520.764	3.34156			411	0.0341429
		648.164	3.17059	522.813	2.48746			413	0.0271579
		649.644	1.84351	524.857	2.77489			415	0.0228169
		651.056	2.28708	526.901	2.68015			417	0.019625
		652.426	2.83626	529.161	3.07983			419	0.0220158
		653.945	1.90706	531.803	3.33559			422	0.0208475
		656.319	2.43814	535.253	3.0117			424	0.0211245
		658.739	2.67901	540.738	3.00763			426	0.0164483
		661.168	3.85542	550.518	2.81787			428	0.0174403
		663.696	3.71728	558.998	3.72759			431	0.0180078
		666.368	3.79399	567.759	4.28793			433	0.0160932
		669.483	4.79144	569.521	4.51402			435	0.0187045
		672.599	2.76211	571.282	3.55981			437	0.0211947
		675.714	2.1938	573.396	3.77273			439	0.0242289
		679.054	2.07353	575.47	4.9848			440	0.0216889
		680.037	3.17778	577.404	5.50156			443	0.0258564
		680.711	4.03608	579.267	3.54137			445	0.0244262
		681.439	2.49356	581.114	3.38182			447	0.0172881
		682.217	7.11966	582.993	3.49828			449	0.0218056
		683.04	4.11441	584.954	3.63699			451	0.0257513
		683.988	7.3815	587.038	3.91985			454	0.0194758
		685.004	5.74603	589.278	5.36522			456	0.0174101
		687.685	5.59259	591.672	5.19923			458	0.017483
		690.866	5.47619	594.186	4.42151			460	0.0192164
		695.609	3.75355	596.769	4.76632			463	0.0218667
		701.235	2.26493	599.392	4.41254			465	0.0190875
		706.308	4.88696	602.071	6.22967			467	0.0160573
		710.155	2.88649	604.871	4.99313			469	0.0179152
		713.064	3.34682	607.888	4.5873			471	0.0209756
		715.441	2.71287	611.256	5.05042			474	0.0276136
		717.487	3.84456	615.136	4.34836			476	0.0257209
		719.277	3.76395	619.696	5.0979			478	0.0245
		720.998	3.94828	624.963	3.95259			480	0.0236408
		722.899	2.94009	630.624	2.98893			482	0.0210891
		725.334	4.2	636.057	3.13636			485	0.0193833
		728.698	3.87786	640.845	2.54259			487	0.0195067
		733.05	2.79882	645.015	2.95185			489	0.0167742
		737.406	3.52632	648.716	4.12081			491	0.021658
		741.095	2.3237	655.137	3.19663			493	0.0301282
		744.306	3.2649	657.928	2.35065			496	0.0325294
		747.455	2.32061	660.464	2.51087			498	0.0300613
		750.88	3.00866	662.789	2.55251			500	0.0251531
		754.53	2.87984	664.678	2.76442			502	0.0237681
		758.305	4.26718	666.566	3.03226			504	0.0242601
		762.11	4.36928	668.517	2.58947			507	0.0254974
		765.769	6.95735	670.412	3.53953			509	0.0266286
		769.428	5.04242	672.286	5.07426			512	0.0313018
		772.902	4.37282	676.132	3.25072			514	0.0336709
		776.291	2.38554	678.094	5.76555			517	0.0304242
		779.688	2.98125	680.199	4.38491			520	0.0286286
		783.085	2.35874	682.444	3.6			522	0.0276687
				684.866	5.09116			525	0.0271892
				687.518	4.06818			526	0.0256364
				690.598	5.40506			530	0.0264192
				693.677	2.95489			532	0.026556
				697.393	4.85496			535	0.024697
				701.109	2.99015			537	0.0216216
				705.198	4.27083			540	0.0213
				709.287	3.8366			542	0.0241948
				713.205	2.6749			545	0.0217073
				716.822	3.63889			548	0.0181146
				720.155	4.052			550	0.021092
				723.303	3.85333			553	0.0211404
				726.409	5.06667			555	0.0184596
				729.641	3.56216			557	0.0186256
				733.217	5.58667			560	0.0179333
				737.98	3.57955			561	0.0212694
				742.743	3.65563			567	0.0234783
				749.075	2.66111			571	0.0235104
				755.289	2.36327			573	0.0276364
				760.433	3.33571			576	0.0247403
				763.858	3.06061			578	0.0229831
				767.284	2.7649			582	0.0201366
				770.709	3.40569			585	0.0231054
				773.149	3.79783			588	0.0248943
				775.323	3.38445			591	0.0293529
				777.318	4.38194			594	0.0234653
				779.195	4.21691			598	0.0193249
				781.002	3.97143			601	0.0179695
				782.776	3.575			604	0.01855
				784.195	3.26407			607	0.0221299
				786.358	2.08299			610	0.0251149
				788.226	4.375			613	0.0259021
				790.196	3.26147			616	0.0266978
				792.324	2.73209			620	0.0266441
				794.694	3.21306			622	0.02703
				797.455	3.74319			625	0.0219475
				800.868	2.41304			628	0.0226995
				805.477	2.72752			631	0.0188303
				812.065	5.16206			634	0.0199536
				818.532	4.14545			637	0.0213055
				826.045	5.312			640	0.0203069
				832.193	5.01307			643	0.0191667
				837.321	5.55991			646	0.0201031
				842.449	5.37015			649	0.0207916
				847.666	5.06468			652	0.0207923
				853.857	5.2069			655	0.0212403
				861.044	4.54772			658	0.0194064
				872.446	4.7541			661	0.0183747
				877.495	4.37544			664	0.0192235
				882.968	2.75758			667	0.0182735
				889.367	3.10632			670	0.0170686
				896.906	2.95511			673	0.0296891
				905.137	3.91159			676	0.0201319
				912.781	2.39564			678	0.0211953
				918.605	2.18837			682	0.0251974
				922.938	3.98225			685	0.0266869
				926.036	2.62284			688	0.0402356
				929.133	2.85			692	0.024081
				932.231	3.33			695	0.0232131
				935.328	3.35731			699	0.0218243
				937.981	7.99413			702	0.0220213
				940.634	6.17125			706	0.0294091
				943.531	8.33992			709	0.0314423
				946.772	8.93567			712	0.0240541
				951.043	8.05625			715	0.0183851
				955.313	5.08072			718	0.0182904
				961.424	3.00542			720	0.0169412
				967.486	6.25			723	0.0180769
				977.991	6.21231			726	0.0194747
				987.049	5.57466			728	0.0211905
				995.896	5.10417			731	0.0209816
				1004.76	6.23711			733	0.02
				1013.56	4.86235			736	0.0189474
				1021.5	4.11475			739	0.0206189
				1028.41	3.63768			741	0.035744
				1034.9	3.07212			744	0.0182816
				1040.09	4.34328			746	0.0154463
				1045.27	3.44025			749	0.0153211
								757	0.0179459
								759	0.0164906
								762	0.0186914
								764	0.016325
								767	0.016987
								770	0.0171316
								772	0.0211254
								775	0.0242105
								777	0.0260825
								780	0.0262431
								783	0.0279856
								785	0.0328571
								788	0.0279054
								790	0.0269061
								793	0.0262249
								796	0.0202023
								798	0.0208657
								801	0.0195251
								804	0.0168927
								806	0.0174805
								809	0.0161765
								812	0.0173842
								814	0.0167151
								817	0.0179801
								820	0.0183448
								822	0.0174373
								825	0.0154229
								828	0.0231381
								830	0.0244493
								833	0.0381509
								836	0.0210803
								838	0.0192651
								841	0.0234211
								844	0.0251095
								846	0.023913
								849	0.0223754
								852	0.0218584
								854	0.0230871
								855	0.0220427
								856	0.0228346
								857	0.0264541
								858	0.0242706
								859	0.0251133
								860	0.0298773
								860	0.025642
								862	0.0272085
								862	0.0313523
								863	0.0286026
								864	0.0290431
								866	0.0302137
								867	0.0302137
								868	0.0250171
								870	0.0237151
								871	0.0227945
								872	0.0220968
								874	0.0218667
								875	0.0220334
								877	0.0219537
								878	0.0227763
								879	0.0230816
								881	0.0218675
								882	0.0191761
								883	0.0199455
								885	0.0201823
								886	0.0232243
								887	0.0203918
								889	0.0206289
								890	0.0157469
								891	0.0137739
								893	0.0142545
								894	0.0191569
								896	0.022897
								897	0.0244872
								898	0.0225781
								900	0.0246789
								901	0.0225545
								902	0.0242353
								904	0.0243103
								905	0.0247788
								906	0.0248125
								908	0.0244295
								909	0.0230169
								911	0.0257239
								912	0.022741
								913	0.021971
								915	0.0180926
								916	0.0182597
								917	0.0176821
								919	0.017706
								920	0.0179661
								922	0.0173111
								923	0.0172261
								924	0.0180531
								926	0.0200236
								940	0.0226349
								943	0.0248754
								946	0.026338
								948	0.0289961
								951	0.0296507
								953	0.02612
								957	0.0262121
								959	0.0249393
								962	0.0248955
								964	0.0235583
								967	0.0255521
								970	0.0297083
								972	0.0245106
								975	0.0196452
								977	0.0280105
								979	0.0264171
								982	0.02364
								985	0.0236552
								987	0.0253333
								989	0.0161466
								992	0.0299432
								994	0.0311111
								997	0.030117
								1000	0.0297207

## Sheet: Physical prameters.
IODP U1304 Age(ka)	Suspen. vol. SI x 10^-6	SUSAS_stack Age(ka)	Normalized MS	ODP 1091 Age(ka)	Color 650-750 (%)	ODP 1093 Age(ka)	Color 650-750 (%)	ODP 1091 Age(ka)	Color 650-750 (%)
0	41.43	2	-1.68	2.37	34.22	0.19	28.91	0.07	23.04
0.1375	26.34	4	-1.44	2.88	34.77	0.24	30.75	0.21	27.88
0.1375	45.85	6	-1.29	3.39	40.96	0.29	32.04	0.36	25.34
0.275	32.06	8	-1.11	3.89	39.31	0.34	33.43	0.49	27.56
0.275	45.47	10	-0.92	4.4	44.02	0.4	31.33	0.63	25.31
0.4125	32.08	12	-0.61	4.9	41.39	0.45	30.99	0.77	28.19
0.4125	43.19	14	-0.2	5.4	44.1	0.5	31.13	0.9	25.71
0.55	34.1	16	0.14	5.9	40.46	0.56	30.45	1.03	25.73
0.55	43.51	18	0.5	6.4	39.68	0.61	28.55	1.16	21.27
0.6875	37.41	20	0.5	6.89	38.85	0.66	28.71	1.29	20.72
0.6875	44.24	22	0.51	7.39	36.65	0.72	30.41	1.42	22.57
0.825	37.13	24	0.44	7.88	33.08	0.77	30.29	1.54	24.78
0.825	43.27	26	0.16	8.37	30.94	0.82	29.57	1.67	28.72
0.9625	38.15	28	-0.1	8.87	30.55	0.88	27.18	1.79	27.11
0.9625	45.99	30	-0.22	9.35	33.46	0.93	27.05	1.91	28.91
1.1	37.47	32	-0.32	9.84	30.16	0.98	27.94	2.03	26.17
1.1	47.32	34	-0.38	10.33	29.72	1.03	29.56	2.15	26.1
1.2375	37.49	36	-0.38	10.81	29.44	1.09	28.84	2.26	23.8
1.2375	50.67	38	-0.36	11.3	26.07	1.14	28.22	2.38	26.5
1.375	40.21	40	-0.41	11.78	27.34	1.19	28.83	2.49	28.91
1.375	49.4	42	-0.42	12.26	24.85	1.25	29.93	2.6	30.52
1.5125	42.24	44	-0.48	12.74	28.47	1.3	30.3	2.71	29.64
1.5125	50.13	46	-0.46	13.21	26.37	1.35	29.64	2.82	25.55
1.65	41.26	48	-0.48	13.69	28.3	1.41	29.54	2.93	25.61
1.65	56.16	50	-0.47	14.16	27.87	1.46	29.26	3.04	25.01
1.7875	40.59	52	-0.44	14.64	27.85	1.51	27.76	3.14	26.66
1.7875	57.49	54	-0.37	15.11	24.83	1.57	26.47	3.25	27.25
1.925	45.02	56	-0.28	15.58	23.69	1.62	25.03	3.35	24.84
1.925	56.52	58	-0.06	16.05	21.87	1.67	25.05	3.45	21.1
2.0625	46.06	60	0.14	16.51	20.86	1.72	26.19	3.55	20.36
2.0625	59.55	62	0.19	16.98	20.37	1.78	27.44	3.65	23.12
2.2	46.09	64	0.36	17.45	20.02	1.83	27.43	3.75	26.11
2.2	59.58	66	0.62	17.91	19.66	1.88	26.82	4.18	25.82
2.3375	52.42	68	0.54	18.37	19.54	2.07	26.09	4.27	24.94
2.3375	60.92	70	0.34	18.83	20.38	2.12	25.63	4.36	24.89
2.475	54.75	72	0.01	19.06	21.75	2.18	25.45	4.45	24.56
2.475	61.95	74	-0.2	19.98	20.5	2.23	22.99	4.54	24.2
2.6125	45.48	76	-0.38	20.43	20.93	2.28	24.38	4.63	24.73
2.6125	57.99	78	-0.53	20.89	20.05	2.33	25.84	4.71	25.25
2.82	54.52	80	-0.69	21.34	18.53	2.39	28.02	4.8	25.61
2.82	60.72	82	-0.73	21.8	16.3	2.44	27.91	4.89	23.75
3.045	53.55	84	-0.72	22.25	15.98	2.49	27.12	4.97	20.4
3.045	60.06	86	-0.68	22.7	17.79	2.55	27.65	5.05	19.87
3.27	56.28	88	-0.6	23.14	18.63	2.6	26.86	5.14	20.4
3.27	64.49	90	-0.6	23.59	20.05	2.65	26.25	5.22	22.41
3.495	57.91	92	-0.67	24.04	17.99	2.71	25.75	5.3	22.76
3.495	63.53	94	-0.77	24.48	18.34	2.76	26.67	5.38	21.99
3.72	22.98	96	-0.84	24.93	18.2	2.81	28.08	5.46	22.01
3.72	29.16	98	-0.89	25.37	20.27	2.87	29.25	5.53	19.78
3.72	56.35	100	-0.91	25.81	21.63	2.92	27.89	5.61	21.57
3.945	59.69	102	-0.91	26.25	20.5	2.97	26.4	5.69	21.18
3.945	61.66	104	-0.83	26.69	20.53	3.02	24.7	5.77	22.61
4.17	55.42	106	-0.74	27.13	20.68	3.08	24.77	5.84	21.66
4.17	67.94	108	-0.69	27.56	21.18	3.13	24.84	5.92	19.48
4.395	60.76	110	-0.63	28	21.9	3.18	26.74	5.99	20.14
4.395	71.92	112	-0.62	28.43	21.59	3.24	27.47	6.06	21.48
4.62	56.79	114	-0.67	28.87	24.05	3.29	27.22	6.14	26.21
4.62	71.2	116	-0.73	29.3	23.35	3.34	22.76	6.21	24.49
4.845	56.13	118	-0.78	29.73	22.47	3.4	23.18	6.28	23.47
4.845	70.19	120	-0.84	30.16	21.22	3.45	21.96	6.35	18.51
5.07	18.72	122	-0.83	30.59	20.86	3.5	24.72	6.42	21.16
5.07	34.86	124	-0.77	31.01	21.26	3.61	25.1	6.49	20.57
5.07	69.17	126	-0.61	31.44	19.3	3.66	27.46	6.56	24.34
5.295	58.74	128	-0.37	31.86	20.15	3.71	29.72	6.63	21.69
5.295	72.85	130	-0.13	32.29	19.28	3.77	29.32	6.7	21.74
5.52	62.06	132	0.11	32.71	20.69	3.82	29.27	6.76	21.02
5.52	70.13	134	0.27	33.13	19.96	4.06	27.76	6.83	20.35
5.745	63.38	136	0.37	33.55	19.9	4.11	27.96	6.9	21.83
5.745	67.81	138	0.43	33.97	19.89	4.17	27.33	7.06	23.3
5.97	63.1	140	0.46	34.39	20.86	4.22	24.76	7.13	25.99
5.97	71.49	142	0.49	34.81	21.01	4.27	24.13	7.19	27.04
6.195	62.12	144	0.47	35.23	20.43	4.32	20.09	7.26	27.49
6.195	73.76	146	0.47	35.43	20.69	4.38	22.29	7.32	26.69
6.42	64.13	148	0.51	36.26	20.71	4.43	22.93	7.38	26.05
6.42	73.43	150	0.53	36.67	19.87	4.48	24.82	7.45	25.28
6.645	66.45	152	0.61	37.09	19.36	4.54	23.98	7.51	27.29
6.645	72.71	154	0.67	37.5	20.19	4.59	24.02	7.57	26.87
6.87	64.17	156	0.76	37.91	20.01	4.64	26.66	7.63	27.6
6.87	71.98	158	0.78	38.32	18.98	4.7	27.47	7.7	26.33
7.095	66.19	160	0.66	38.72	17.76	4.75	26.43	7.76	27.85
7.095	73.94	162	0.53	39.13	19.18	4.8	26.2	7.82	25.57
7.32	70.21	164	0.55	39.54	19.18	4.86	24.35	7.88	25.72
7.32	71.91	166	0.4	39.94	20.85	4.91	24.73	7.94	23.73
7.545	69.24	168	0.32	40.34	20.48	4.96	23.95	8	25.22
7.545	73.57	170	0.26	40.75	21.21	5.01	26.28	8.06	23.93
7.77	71.27	172	0.33	41.15	21.56	5.07	25.15	8.12	27.87
7.77	76.24	174	0.46	41.55	24.09	5.12	25.54	8.18	27.61
7.995	72.3	176	0.54	41.95	25.88	5.17	24.75	8.24	28.43
7.995	73.21	178	0.6	42.35	28.37	5.23	26.33	8.3	26.39
8.22	74.78	180	0.64	42.75	27.67	5.28	26.41	8.36	29.82
8.22	76.02	182	0.7	43.14	28.2	5.33	26.81	8.42	31.5
8.445	72.67	184	0.66	43.54	27.77	5.39	27.93	8.48	33.11
8.445	76.45	186	0.56	43.94	25.04	5.44	28.96	8.54	31.77
8.67	70.7	188	0.32	44.33	21.85	5.49	28.87	8.6	32
8.67	81.12	190	0.1	44.72	18.43	5.55	26.92	8.66	34.14
8.895	78.13	192	-0.17	45.12	17.97	5.6	26.22	8.72	33.8
8.895	81.08	194	-0.39	45.51	18.92	5.65	26.02	8.78	33.31
9.12	81.16	196	-0.41	45.9	17.6	5.7	26.86	8.84	30.34
9.12	83.35	198	-0.39	46.29	18.88	5.76	26.53	8.9	30.95
9.345	83.19	200	-0.32	46.68	18.07	5.81	26.68	8.95	33.94
9.345	87.01	202	-0.21	47.07	19.74	5.86	24.38	9.01	33.95
9.57	83.82	204	-0.21	47.45	18.48	8.04	23.72	9.06	33.32
9.57	92.58	206	-0.29	47.84	18.66	8.09	22.42	11.93	33.99
9.795	85.25	208	-0.37	48.23	18.69	8.15	21.48	12	35.25
9.795	89.54	210	-0.42	48.61	19.28	8.2	19.7	12.26	33.99
10.02	87.28	212	-0.45	48.99	19.09	8.25	17.17	12.27	35.25
10.02	87.51	214	-0.49	49.38	19.31	8.3	18.22	12.29	35.71
10.245	85.47	216	-0.46	51.09	19.13	8.36	19.69	12.3	31.62
10.245	86.92	218	-0.37	51.47	19.33	8.41	21.57	12.32	29.36
10.47	27.97	220	-0.27	51.85	18.99	8.46	22.69	12.34	25.69
10.47	39.14	222	-0.16	52.22	19.02	8.52	24.65	12.36	28.26
10.47	86.95	224	-0.08	52.6	17.75	8.57	28.74	12.38	26.82
10.695	86.96	226	-0.02	52.98	15.6	8.62	30.67	12.4	30.3
10.695	89.39	228	-0.05	52.98	15.15	8.68	31.2	12.43	27.39
10.92	91.72	230	-0.21	53.35	15.91	8.73	29.91	12.45	29.58
10.92	93.64	232	-0.35	53.72	18.12	8.78	30.46	12.48	25.87
11.145	93.76	234	-0.5	54.1	18.39	8.84	26.21	12.51	26.83
11.145	97.22	236	-0.68	54.47	18.69	8.89	24.27	12.54	27.42
11.37	94.09	238	-0.8	54.84	18.34	8.94	22.12	12.57	31.8
11.37	96.6	240	-0.78	55.21	17.86	8.99	25.81	12.6	27.47
11.595	93.58	242	-0.69	55.58	19.12	9.05	28.44	12.64	26.83
11.595	93.83	244	-0.63	55.95	17.67	9.1	27.31	12.67	25.23
11.82	32.32	246	-0.57	56.32	19.23	9.15	24.56	12.71	32.34
11.82	53.56	248	-0.51	56.69	18.13	9.21	21.77	12.75	31.59
11.82	93.86	250	-0.48	57.06	20.18	9.26	22.85	12.79	32.64
12.045	90.04	252	-0.42	57.42	18.95	9.37	26.15	12.83	28.09
12.045	97.54	254	-0.31	57.79	21.04	9.42	26.92	12.87	28.68
12.27	91.06	256	-0.27	58.15	19.77	9.47	27.63	12.92	29.66
12.27	99.12	258	-0.23	58.52	21.69	9.52	25.93	12.96	31.63
12.495	91.78	260	-0.09	58.88	18.17	9.58	26.35	13.01	31.82
12.495	99.5	262	0.17	59.25	20	9.63	25.77	13.06	29.86
12.72	95.1	264	0.36	59.61	18.76	9.68	26.82	13.11	33.33
12.72	102.08	266	0.59	59.97	22.37	9.74	24.18	13.16	33.67
12.945	98.12	268	0.94	105.22	20.55	9.79	25.35	13.21	36.44
12.945	101.75	270	1.25	105.53	19.26	10.28	26.29	13.27	35.12
13.17	99.13	272	1.48	105.83	19.29	10.42	29.89	13.32	37.13
13.17	102.02	274	1.59	106.14	18.77	10.56	30.06	13.38	35.06
13.395	98.85	276	1.49	106.45	21.5	10.7	29.7	13.44	36.92
13.395	103.99	278	1.16	106.75	21.22	10.84	29.68	13.5	34.81
13.62	96.17	280	0.67	107.05	22.16	10.99	28.51	13.56	37.55
13.62	101.36	282	0.27	107.21	20.58	11.13	26.54	13.59	31.82
13.845	97.19	284	-0.11	107.82	21.4	11.27	26.07	13.71	27.55
13.845	101.92	286	-0.5	108.12	22.55	11.56	21.41	13.78	20.72
14.07	94.21	288	-0.6	108.42	26.39	11.71	21.71	13.85	19.59
14.07	94.59	290	-0.53	108.73	31.24	11.86	21.41	13.91	19.3
14.295	93.56	292	-0.37	109.03	35.2	12	26.34	13.98	18.8
14.295	97.24	294	-0.43	109.33	39.51	12.21	23.72	14.06	18.22
14.52	89.23	296	-0.39	109.64	40.74	12.22	22.42	14.13	17.87
14.52	90.27	298	-0.24	109.94	42.98	12.22	21.48	14.2	18.13
14.745	63.79	300	-0.35	110.24	44.2	12.23	19.7	14.28	17.38
14.745	65.59	302	-0.63	110.55	44.1	12.23	17.17	14.35	18.32
14.9518	23.72	304	-0.73	110.85	40.27	12.24	18.22	14.43	18.65
14.9518	27.16	306	-0.82	111.15	34.62	12.25	19.69	14.51	18.84
14.9518	31.62	308	-0.87	111.45	29.26	12.26	21.57	14.59	18.57
15.1542	29.43	310	-0.87	111.75	25.77	12.28	22.69	14.67	17.35
15.1542	31.07	312	-0.89	112.06	24.11	12.29	24.65	14.75	17.66
15.1542	55.74	314	-0.93	112.36	24.24	12.3	28.74	14.84	16
15.3565	38.7	316	-0.93	112.66	23.41	12.32	30.67	14.92	16.96
15.3565	41.1	318	-0.89	112.96	23.56	12.34	31.2	15.01	16.28
15.3565	52.06	320	-0.91	113.26	21.32	12.36	29.91	15.1	17.84
15.5588	36.43	322	-1	113.56	21.52	12.38	30.46	15.19	16.38
15.5588	47.38	324	-1.19	113.87	20.14	12.4	26.21	15.28	16.65
15.5588	51.66	326	-1.25	114.17	21.59	12.42	24.27	15.37	16.73
15.7611	86.1	328	-1.28	114.47	18.93	12.45	22.12	15.47	17.85
15.7611	89.02	330	-1.29	114.77	20.05	12.47	25.81	15.56	19.05
15.7611	94.16	332	-1.16	115.07	19.11	12.5	28.44	15.66	17.86
15.9634	109.12	334	-1.03	115.37	22.04	12.53	27.31	15.75	18.11
15.9634	121.79	336	-0.81	115.67	21.22	12.56	24.56	15.85	16.86
15.9634	125.59	338	-0.59	115.97	22	12.59	21.77	15.95	16.98
16.1657	106.84	340	-0.39	116.27	21.03	12.62	22.85	16.05	15.45
16.1657	112.22	342	-0.13	116.57	21.68	12.69	26.15	16.16	13.92
16.1657	114.25	344	-0.02	116.87	20.63	12.73	26.92	16.26	15.3
16.368	89.16	346	-0.08	117.17	21.39	12.77	27.63	16.36	17.05
16.368	110.85	348	-0.02	117.47	20.25	12.8	25.93	16.47	18.8
16.368	112.51	350	0.09	117.77	20.43	12.84	26.35	16.58	17.12
16.5703	90.88	352	0.26	118.07	16.97	12.88	25.77	16.69	15.15
16.5703	100.28	354	0.57	118.37	16.15	12.93	26.82	16.8	13.29
16.5703	101.18	356	0.83	118.52	16.01	12.97	24.18	16.85	14.86
16.7726	85.62	358	1.04	119.12	17.47	13.01	25.35	18.76	16.56
16.7726	90.9	360	1.04	119.41	17.6	13.06	26.29	18.89	18.71
16.9749	61.92	362	0.88	119.71	18.09	13.23	29.89	19.02	15.85
16.9749	93.35	364	0.68	120.01	19.23	13.28	30.06	19.16	14.57
17.1772	101.39	366	0.26	120.31	19.61	13.34	29.7	19.29	13.28
17.1772	105.25	368	-0.01	120.61	18.49	13.39	29.68	19.43	15.04
17.3795	14.68	370	-0.04	120.91	17.94	13.44	28.51	19.57	15.75
17.3795	111.02	372	-0.02	121.21	19.42	13.5	26.54	19.7	15.77
17.3795	123.28	374	0.05	121.51	19.45	13.56	26.07	19.84	15.26
18.0255	77.96	376	-0.02	121.8	19.18	13.62	21.41	19.99	14.79
18.0255	129.76	378	-0.13	122.1	18.55	13.73	21.71	20.13	15.19
18.0255	131.61	380	-0.21	122.4	18.43	13.8	21.41	20.27	15.49
18.7823	78.94	382	-0.29	122.7	19.73	13.86	26.34	20.41	15.82
18.7823	130.49	384	-0.38	123	18.6	13.91	26.45	20.56	15.58
18.7823	131.04	386	-0.4	123.29	18.76	13.98	28.67	20.71	16.73
19.5391	57.22	388	-0.42	123.59	18.62	14.06	29.44	20.86	15.63
19.5391	126.53	390	-0.44	123.89	19.07	14.13	29.31	21	15.02
20.2959	37.72	392	-0.44	124.19	19.27	14.18	28.35	21.15	13.17
20.2959	38.9	394	-0.48	124.48	19.75	14.26	29.27	21.31	13.99
20.2959	78.86	396	-0.56	124.78	19.64	14.33	30.26	21.46	13.77
20.2959	121.72	398	-0.75	125.08	20.61	14.41	30.37	21.61	15.42
21.0527	42.19	400	-0.99	125.38	18.85	14.45	28.78	21.77	14.49
21.0527	110.15	402	-1.21	125.67	19.83	15.21	29.23	22.2	16.33
21.0527	118.34	404	-1.32	125.97	18.75	15.3	28.45	22.36	16.28
21.8095	26.87	406	-1.36	126.27	19.3	15.4	28.46	22.52	18.27
21.8095	92.79	408	-1.4	126.57	19.42	15.47	26.42	22.68	18.45
21.8095	102.36	410	-1.36	126.86	19.25	15.56	25.54	22.84	18.98
22.5664	41.85	412	-1.32	127.16	20.11	15.66	23.9	23	18.99
22.5664	88.22	414	-1.26	127.46	18.55	15.73	22.36	23.17	18.6
22.5664	92.08	416	-1.18	127.75	19.74	15.83	20.32	23.33	17.26
23.3232	60.8	418	-1.37	128.05	18.7	15.93	19.64	23.5	16.57
23.3232	71.55	420	-1.29	128.35	19.26	16	20.08	23.67	15.89
23.3232	73.83	422	-1.14	128.64	17.68	16.1	19.4	23.84	15.95
24.08	43.88	424	-0.94	128.94	18.45	16.21	18.57	24.01	15.07
24.08	78.11	426	-0.65	130.27	17.34	16.29	18.97	24.18	15.42
24.08	124.51	428	-0.31	130.57	16.37	16.39	19.4	24.35	15.6
24.8225	78.13	430	0.05	130.87	14.24	16.47	19.65	24.53	16.27
24.8225	79.31	432	0.38	131.16	14.23	16.58	18.4	24.7	15.78
24.8225	118.79	434	0.18	131.46	14.99	16.69	17.96	24.88	15.75
25.5651	78.85	436	-0.01	131.76	15.35	16.77	18.33	25.05	16.41
25.5651	79.35	438	-0.29	132.05	15.76	16.88	18.52	25.23	17.13
25.5651	116.46	440	-0.5	132.35	15.53	16.99	18.94	25.41	16.98
26.3076	59.39	442	-0.63	132.64	18.34	17.08	18.52	25.59	16.94
26.3076	71.87	444	-0.65	132.94	18.18	17.19	18.7	25.77	16.85
26.3076	113.43	446	-0.46	133.24	18.18	17.28	19.33	25.95	17.08
27.0502	25.72	448	-0.01	133.53	17.23	17.4	20.3	26.13	16.77
27.0502	70.19	450	0.21	133.83	16.96	17.51	20.98	26.32	15.1
27.0502	114.7	452	0.26	134.12	18.96	17.6	21.5	26.5	15.44
27.7927	74.91	454	0.36	134.42	17.51	17.72	21.46	26.69	15.93
27.7927	78.46	456	0.44	134.72	17.87	17.81	22.69	26.88	17.51
27.7927	107.38	458	0.41	135.01	16.35	17.94	22.42	27.07	15.54
28.5353	73.79	460	0.38	135.31	16.18	18.06	23.99	27.25	14.86
28.5353	81.24	462	0.5	135.6	16.52	18.15	23.34	27.25	14.12
28.5353	98.93	464	0.61	135.9	18.05	18.28	25.49	27.44	14.96
29.2778	80.83	466	0.9	136.2	18.49	18.37	24.45	27.64	15.09
29.2778	82.97	468	0.95	136.49	16.43	18.5	24.8	27.83	15.69
29.2778	90.9	470	0.99	136.79	14.41	18.63	22.91	28.02	17.2
30.0204	34.16	472	0.84	137.08	13.61	19.02	23.15	28.9	14.94
30.0204	88.87	474	0.37	137.38	15.74	19.16	23.89	29.1	14.8
30.0204	105.3	476	-0.19	137.67	17.32	19.26	25.08	29.3	12.66
30.7629	22.32	478	-0.71	137.97	18.1	19.39	24.93	29.5	12.25
30.7629	98.02	480	-1.06	138.27	18.31	19.5	24.11	29.71	11.7
30.7629	162.24	482	-1.29	138.56	17.31	19.64	23.09	29.91	13.31
31.5054	70.74	484	-1.37	138.86	18.11	19.74	23.08	30.11	15.49
31.5054	84.07	486	-1.37	139.15	17.44	19.88	20.31	30.32	16.78
31.5054	127.51	488	-1.37	139.45	18.25	19.99	20.24	30.52	15.96
32.248	67.06	490	-1.28	139.74	16.51	20.13	19.59	30.73	16.35
32.248	88.7	492	-1.31	140.04	17.61	20.27	21.29	30.94	15.89
32.248	105.48	494	-1.43	140.34	16.8	20.38	20.92	31.15	16.31
32.9905	80.08	496	-1.52	140.63	18.05	20.52	21.68	31.36	16.79
32.9905	94.13	498	-1.58	141.37	17.29	20.63	21.87	31.57	16.85
32.9905	106.15	500	-1.58	141.67	17.25	20.78	21.8	31.78	16.86
33.7331	87.1	502	-1.57	141.96	16.86	20.89	20.76	31.99	16.01
33.7331	90.46	504	-1.56	142.26	16.67	21.04	19.95	32.2	15.57
33.7331	116.72	506	-1.53	142.55	16.56	21.15	19.52	32.42	15.27
34.4756	88.49	508	-1.48	142.85	16.78	21.31	19.21	32.63	15.54
34.4756	89.41	510	-1.39	143.14	17.64	21.42	18.95	32.85	16.98
34.4756	131.08	512	-1.29	143.44	17.59	21.57	18.33	33.07	17.35
35.2182	82.52	514	-1.29	143.74	17.46	21.69	15.95	33.29	17.58
35.2182	90.83	516	-1.35	144.03	16.09	21.84	15.5	33.5	16.26
35.2182	138.65	518	-1.4	144.33	15.65	21.96	15.14	33.72	15.21
35.9607	79.85	520	-1.43	144.62	15.67	22.12	18.04	33.95	15.25
35.9607	86.85	522	-1.4	144.92	15.93	22.24	19.13	34.17	15.01
35.9607	130.01	524	-1.39	161.81	17.63	22.4	20.08	34.39	15.57
36.7032	86.58	526	-1.39	162.1	19.13	22.52	19.84	34.61	15.17
36.7032	87.17	528	-1.36	162.4	18.53	22.68	19.04	34.84	16.15
36.7032	133.28	530	-1.33	162.7	17.97	22.8	18.86	35.06	16.58
37.4458	80.19	532	-1.17	162.99	17.87	22.96	18.85	35.29	16.57
37.4458	89.92	534	-0.87	163.29	18.09	23.09	19.64	35.52	16.8
37.4458	130.94	536	-0.7	163.59	17.85	23.21	19.7	35.75	16.72
38.1883	81.91	538	-0.55	163.89	16.62	23.38	20.22	35.97	17.32
38.1883	92.65	540	-0.36	164.18	16.89	23.5	17.73	36.2	15.87
38.1883	125.51	542	0.15	164.48	16.71	24.01	17.58	36.43	15.67
38.9309	85.24	544	0.34	164.78	17.06	24.18	16.66	37.02	14.39
38.9309	91.69	546	0.35	165.08	17.47	24.31	18.81	37.25	13.88
38.9309	114.87	548	0.31	165.38	18.03	24.48	18.93	37.48	12.4
39.6734	15.7	550	0.29	165.67	18.67	24.61	19.08	37.72	10.27
39.6734	35.44	552	0.27	165.97	18.42	24.79	18.94	37.96	10.11
39.6734	86.26	554	0.35	166.27	18.62	24.92	18.91	38.19	10.49
39.6734	91.02	556	0.33	166.57	18.12	25.1	18.98	38.43	11.97
40.416	73	558	0.39	166.87	15.92	25.23	19.95	38.67	10.98
40.416	91.06	560	0.42	167.16	16.57	25.36	21.05	38.91	10.02
40.416	93.99	562	0.42	167.46	15.95	25.54	21.83	39.15	9.93
41.0854	76	564	0.37	167.76	17.43	25.68	22.63	39.39	12.85
41.0854	93.62	566	0.21	168.06	16.74	25.86	21.6	42.35	16.46
41.0854	104.09	568	0.07	168.36	17.13	26	18.87	42.61	18.51
41.4622	74.7	570	-0.04	168.65	16.89	26.18	15.26	42.86	18.67
41.4622	93.06	572	-0.22	168.95	16.69	26.32	15.51	43.11	18.68
41.4622	103.83	574	-0.33	169.25	17.21	26.46	17.08	43.37	17.01
41.8391	25.02	576	-0.33	169.55	17.67	26.64	18.47	43.62	17.1
41.8391	42.17	578	-0.23	169.85	18.03	26.78	17.09	43.88	17.25
41.8391	80	580	-0.08	170.15	18.29	26.97	17.04	44.13	17.18
41.8391	87.69	582	0.04	170.45	18.41	27.11	17.26	44.39	15.97
42.2159	84.74	584	0.1	170.74	18.38	27.25	18.56	44.65	15.39
42.2159	93.72	586	0.12	171.04	16.25	27.44	19.59	44.91	17.66
42.2159	118.7	588	0.07	171.34	14.11	27.59	20.23	45.17	18.33
42.5927	89.06	590	0.03	171.64	15.33	27.73	20.23	45.43	17.3
42.5927	103.45	592	0.04	171.94	16.7	27.92	19.98	45.69	17.24
42.5927	130.7	594	0.02	172.24	20.48	28.07	19.84	45.82	19.23
42.9696	94	596	0.03	172.39	19.94	28.26	19.96	56.71	20.17
42.9696	95.08	598	0.09	172.99	21.08	28.41	19.89	57	18.89
42.9696	99.18	600	0.12	173.29	21.34	28.56	20.13	57.28	18.12
43.3464	89.51	602	0.16	173.58	20.88	28.76	20.48	57.57	17.49
43.3464	92	604	0.17	173.88	20.41	28.9	21.32	57.87	18.74
43.3464	97.1	606	0.21	174.18	20.19	29.05	21.83	58.16	18.01
43.7233	88.24	608	0.16	174.48	21.07	29.25	22.05	58.45	19.2
43.7233	92	610	0.08	174.78	22.45	30.01	22.17	58.74	18.66
43.7233	97.11	612	0.04	175.08	20.9	30.16	22.51	59.03	18.35
44.1001	90.28	614	-0.04	175.38	20.52	30.37	22.79	59.33	17.58
44.1001	93	616	-0.1	175.68	19.55	30.52	22.93	59.62	17.72
44.1001	97.83	618	-0.04	175.98	20.16	30.68	21.13	59.91	18.23
44.4769	92.61	620	0.13	176.28	19.53	30.89	20.96	60.21	18.76
44.4769	94.3	622	0.29	176.58	16.32	31.04	20.83	60.5	19.61
44.4769	97.45	624	0.45	176.88	15.2	31.2	23.03	60.8	18.69
44.8538	93.7	626	0.6	177.18	15.54	31.41	23.79	61.1	19.41
44.8538	102.17	628	0.75	177.48	16.84	31.57	24.65	61.39	20.18
45.2306	90.98	630	0.85	177.78	17.24	31.72	25.1	61.69	22.06
45.2306	93	632	0.87	178.08	16.58	31.94	25.7	61.99	21.85
45.2306	95.49	634	0.88	178.38	15.81	32.1	24.73	62.29	20.22
45.6075	93.02	636	0.89	178.68	15.22	32.26	23.96	62.59	19.09
45.6075	93.7	638	0.91	178.98	16.51	32.42	22.42	62.89	17.78
45.6075	102.51	640	0.93	179.28	17.6	32.63	23.48	63.19	18.02
45.9843	94.3	642	0.95	179.58	17.47	32.8	22.89	63.49	17.47
45.9843	97.06	644	0.94	179.88	18.7	32.96	22.31	63.79	17.33
45.9843	102.54	646	0.93	180.18	20.43	33.18	19.89	64.09	16.75
46.3612	95	648	0.97	180.48	21.96	33.34	19.81	64.4	16.67
46.3612	101.49	650	1.13	180.78	21.21	33.5	19.97	64.7	17.05
46.3612	104.27	652	1.27	181.09	20.73	33.72	21.36	65	16.59
46.738	97.13	654	1.38	181.39	20.72	33.89	22.21	65.31	16.89
46.738	98.7	656	1.5	181.69	19.85	34.06	20.68	65.61	17.12
46.738	103	658	1.58	181.99	20.18	34.22	20.33	65.92	17.33
47.1148	32	660	1.62	182.29	19.86	34.45	21	66.22	17.13
47.1148	55.56	662	1.65	182.59	20.24	34.61	22.76	66.99	17.46
47.1148	95.02	664	1.61	182.89	20.19	34.78	21.28	67.3	16.92
47.1148	112.7	666	1.52	183.19	18.84	35.01	20.3	67.6	17.13
47.4917	80.67	668	1.58	183.49	16.98	35.18	21.35	67.91	17.04
47.4917	95.7	670	1.75	184.25	16.93	35.35	23.04	68.22	18.96
47.4917	97.7	672	1.82	184.55	17.14	35.52	21.1	68.53	19.57
47.8685	91.1	674	1.86	184.85	18.33	35.75	20.62	68.84	20.46
47.8685	97.7	676	1.87	185.15	17.5	35.92	21.95	69.15	19.56
47.8685	98.7	678	1.86	185.45	17.69	36.78	24.09	69.46	19.31
48.2454	92.43	680	1.59	185.75	18.04	36.96	25.24	69.77	19.34
48.2454	98.7	682	1.32	186.06	16.7	37.13	23.87	70.08	20.34
48.2454	100.7	684	0.98	186.36	18.42	37.31	23.96	70.39	20.55
48.6222	90.46	686	0.56	186.66	18.29	37.48	24.08	70.71	18.77
48.6222	97.3	688	0.24	186.96	20.84	37.72	24.3	71.02	18.13
48.6222	101.7	690	0.14	187.26	19.79	37.9	24.69	71.33	18.61
48.9991	82.7	692	0.14	187.57	20.57	38.07	24.31	71.64	20.24
48.9991	93.19	694	0.21	187.87	19.67	38.25	24.85	71.96	22.58
48.9991	102.3	696	0.27	188.17	20.01	38.49	24.88	72.27	24.7
49.3759	85	698	0.32	188.47	19.5	38.67	22.96	72.59	26.45
49.3759	94.22	700	0.37	188.78	18.38	38.85	23.06	72.9	23.64
49.3759	101.7	702	0.36	189.08	15.12	39.03	23.27	73.22	21.97
49.7527	88.3	704	0.36	189.38	14.68	39.27	24.24	73.53	20.69
49.7527	97.55	706	0.37	189.68	14.99	39.45	25.04	73.85	24.71
49.7527	100.7	708	0.42	189.99	19.43	39.63	25.48	74.17	27.33
50.1296	89.3	710	0.51	190.29	19.85	39.82	26.28	74.49	29.43
50.1296	94.88	712	0.58	190.68	15.95	40	25.92	74.8	29.03
50.1296	99.7	714	0.64	190.99	17.43	40.24	24.41	75.12	25.97
50.5064	91	716	0.73	191.29	16.74	40.43	22.58	75.44	25.78
50.5064	93.92	718	0.82	191.59	17.13	40.61	19.11	75.76	25.33
50.5064	96.7	720	0.87	191.82	16.89	40.8	17.9	76.08	23.3
50.8833	92	722	0.79	192.12	16.69	40.98	17.33	76.4	23.42
50.8833	93	724	0.6	192.42	17.21	41.23	18.39	76.72	23.38
50.8833	96.65	726	0.32	192.72	17.67	41.42	19.27	77.04	25.11
51.2601	87.7	728	0.14	193.02	18.03	41.6	20.45	77.36	24.41
51.2601	92	730	0	193.32	18.29	41.79	23.07	77.68	23.74
51.2601	92.99	732	0	193.62	18.41	41.98	21.71	78	24.31
51.6369	26.02	734	0.01	193.85	18.38	42.17	23.36	78.16	24.39
51.6369	48	736	0.05	194.15	16.25	42.42	22.1	78.81	24.59
51.6369	91.02	738	0.13	194.45	14.11	42.61	25.29	79.13	26.83
51.6369	92.7	740	0.17	194.75	15.33	42.8	24.25	79.45	26.97
52.0138	86.74	742	0.22	195.05	16.7	42.99	25.3	79.78	27.47
52.0138	88	744	0.27	195.35	20.48	43.18	24.63	80.1	24.21
52.0138	102.76	746	0.29	195.49	19.94	43.37	26.98	80.42	24.36
52.3906	90.36	748	0.62	196.02	21.08	44.13	28.05	80.75	24.7
52.3906	91.7	750	0.99	196.31	21.34	44.33	30.38	81.07	27.76
52.3906	117.09	752	1.33	196.61	20.88	44.52	31.57	81.4	26.53
52.7675	92.78	754	1.72	196.91	20.41	44.71	31.84	81.72	24.79
52.7675	93	756	1.97	197.2	20.19	44.91	31.26	82.05	24.17
52.7675	114.13	758	1.84	197.5	21.07	45.1	27.69	82.38	24.58
53.1443	27.7	760	1.56	197.8	22.45	45.3	25.83	82.7	25.07
53.1443	64.56	762	1.35	198.02	20.9	45.56	24.19	83.03	25.62
53.1443	91.7	764	1.31	198.31	20.52	45.76	25.66	83.36	25.67
53.1443	95.8	766	1.28	198.61	19.55	45.95	25.73	83.68	25.23
53.5212	80.3	768	1.24	198.9	20.16	46.15	25.41	84.01	23.19
53.5212	91.41	770	1.15	199.2	19.53	46.35	24.26	84.34	23.27
53.5212	91.7	772	1.17	199.49	16.32	46.54	23.41	84.67	24.58
53.898	79	774	0.98	199.79	15.2	46.74	20.29	85	25.99
53.898	88	776	0.56	200.08	15.54	46.94	18.9	85.33	24.91
53.898	93.83	778	0.39	200.37	16.84	47.21	17.63	85.65	23.26
54.2748	81.7	780	0.14	200.59	17.24	47.41	19.01	85.98	21.45
54.2748	91	782	-0.04	200.89	16.58	47.61	18.41	86.31	21.02
54.2748	110.85	784	-0.07	201.18	15.81	47.81	18.03	86.64	22.6
54.6517	81	786	0.02	201.47	15.22	48.01	17.71	86.97	23.87
54.6517	103.7	788	0.12	201.76	16.51	48.21	17.3	87.3	24.36
54.6517	123.87	790	0.41	202.05	17.6	48.41	17.03	87.64	21.17
55.0285	107	792	0.75	202.34	17.47	48.61	16.62	87.97	19.34
55.0285	112	794	0.99	202.63	18.7	48.81	15.97	88.3	19.75
55.0285	120.89	796	1.1	202.85	20.43	49.02	16.2	88.63	21.98
55.4023	105.7	798	1.12	203.14	21.96	49.29	16.38	88.96	23.99
55.4023	120.51	800	1.15	203.43	21.21	49.49	17.12	89.29	24.28
55.4023	123	802	1.11	203.72	20.73	49.69	17.39	89.63	25.5
55.7635	88	804	1.12	204.01	20.72	49.9	17.74	89.96	25.55
55.7635	111.94	806	1.18	204.3	19.85	50.1	17.85	90.29	25.72
55.7635	114	808	1.13	204.59	20.18	50.31	17.9	90.46	22.82
56.1248	81	810	1.12	204.88	19.86	50.51	17.99	91.12	23.09
56.1248	96.3	812	0.94	205.17	20.24	50.72	17.69	91.46	21.67
56.1248	109.27	814	0.71	205.45	20.19	50.93	17.33	91.79	22.64
56.4861	75.7	816	0.6	205.67	18.84	51.13	17.38	92.13	22.03
56.4861	83	818	0.32	205.96	16.98	51.89	17.95	92.46	21.81
56.4861	106.3	820	0.12	206.67	16.93	52.1	18.04	92.8	21.65
56.8474	73	822	0.12	206.96	17.14	52.31	17.71	93.13	20.12
56.8474	79.7	824	0.22	207.24	18.33	52.52	17.81	93.47	19.94
56.8474	101.02	826	0.37	207.53	17.5	52.73	17.97	93.8	20.29
56.9919	32	828	0.49	207.81	17.69	52.94	17.77	94.14	22.65
57.2087	79.3	830	0.5	208.1	18.04	53.15	17.39	94.47	25.65
57.2087	82.07	832	0.54	208.38	16.7	53.36	16.86	94.81	25.94
57.3532	85.3	834	0.51	208.6	18.42	53.57	16.56	95.14	25.88
57.57	78.4	836	0.5	208.88	18.29	53.85	14.9	95.48	24.85
57.57	84.7	838	0.47	209.16	20.84	54	19.6	95.82	25.34
57.7123	88.7	840	0.46	209.45	19.79	61.1	24.04	96.15	23.38
57.9258	93.43	842	0.47	209.73	20.57	61.32	29.83	96.49	22.91
57.9258	108.3	844	0.51	210.01	19.67	61.54	31.51	96.83	23.15
58.0681	85	846	0.56	210.3	20.01	61.77	33.27	97.17	24.82
58.2815	37.02	848	0.57	210.58	19.5	61.99	34.41	97.5	25.09
58.2815	82.7	850	0.52	210.86	18.38	62.22	32.95	97.84	26.06
58.2815	98.76	852	0.41	211.14	15.12	62.44	32	98.18	27.02
58.4238	83.7	854	0.24	211.42	14.68	62.66	31.97	98.52	25.97
58.6373	96.19	856	0.12	211.63	14.99	62.89	34.04	98.86	25.63
58.6373	103.04	858	0.08	211.91	19.43	63.11	36.05	99.19	25.59
58.7796	81	860	0.06	212.19	19.85	63.34	37.63	99.53	28.5
58.9931	78.76	862	0.1	212.47	21.57	63.57	37.96	99.87	25.05
58.9931	92.22	864	0.22	212.75	21.69	63.79	38.97	100.21	24.53
59.1354	81.3	866	0.39	213.03	22.69	63.94	40.45	100.55	21.31
59.3488	73.78	868	0.55	213.31	22.1	64.17	42.27	100.89	26.11
59.3488	93.85	870	0.74	213.59	21.78	64.4	41.34	101.23	24.77
59.5093	72.7	872	0.8	213.87	20.54	64.62	42.22	101.57	26.73
59.7773	89.28	874	0.85	214.15	21.33	64.85	41	101.91	25.91
59.7773	98.1	876	0.94	214.42	19.97	65.08	37.92	102.25	29.79
59.9559	73.3	878	0.98	214.7	20.74	65.31	36.5	103.78	31.96
60.2239	90.12	880	1.07	214.98	19.95	65.54	37.01	104.12	34.92
60.2239	90.32	882	1.13	215.25	21.24	65.76	40.75	104.46	37.27
60.4025	76.7	884	1.28	215.46	21.55	65.99	39.27	104.8	37.94
60.6705	85.44	886	1.41	215.74	22.22	66.22	38.45	105.14	36.12
60.6705	91.65	888	1.41	216.01	22.4	66.45	37.62	105.48	33.55
60.8491	80	890	1.49	216.29	22.49	66.6	36.8	105.82	31.24
61.1171	91.69	892	1.43	216.98	20.93	66.83	36.44	106.16	31.36
61.1171	95.85	894	1.25	217.25	18.51	67.06	36.64	106.5	31.14
61.2957	78.7	896	0.85	217.53	17.26	67.3	38.43	106.85	32.72
61.5637	92.42	898	0.78	217.8	18.77	67.53	37.98	107.19	34.56
61.5637	108.87	900	0.63	218.07	20.69	67.76	37.99	107.53	34.94
61.7423	79.3	902	0.49	218.35	20.32	67.99	34.83	107.87	33.85
62.0103	97.06	904	0.31	218.62	19.91	68.22	32.74	108.21	31.79
62.0103	97.89	906	0.4	218.89	18.69	68.45	28.83	108.55	31.63
62.1889	73.7	908	0.35	219.16	18.45	68.68	29.71	108.9	32.7
62.4569	87.21	910	0.64	219.44	17.35	69.46	29.78	109.24	34.07
62.4569	105.79	912	0.92	219.71	17.72	69.69	31.24	109.58	32.51
62.6355	74.7	914	1.27	219.91	17.92	69.85	33.17	109.92	31.93
62.9035	91.94	916	1.76	220.18	18.1	70.08	31.35	110.26	30.29
62.9035	108.83	918	2.14	220.45	17.66	70.31	34.38	110.61	30.07
63.0821	82	920	2.56	220.72	17.93	70.55	32.45	110.95	28.98
63.3501	32.7	922	3.05	221	18.2	70.78	36.69	111.29	25.68
63.3501	64.16	924	3.05	221.27	17.97	71.02	32.72	111.63	25.62
63.3501	107.27	926	2.77	221.53	17.56	71.25	33.12	111.98	26.96
63.5287	82	928	2.28	221.8	17.16	71.49	31.44	112.32	30
63.7967	106	930	1.95	222.07	17.73	71.64	33.03	112.66	30.74
63.7967	122.6	932	1.59	222.34	18.26	71.88	33.03	113.01	31.3
63.9753	76	934	1.44	222.61	18.83	72.12	32.77	113.35	31.8
64.2433	105.3	936	1.27	222.88	18.59	72.35	32.06	113.69	34.93
64.2433	130.33	938	1.28	223.15	16.81	72.59	30.85	114.03	35.66
64.4219	76.7	940	1.12	223.41	17.17	72.82	29.94	114.38	35.89
64.6899	98.3	942	0.93	223.68	17.92	72.98	29	114.72	30.7
64.6899	98.38	944	0.79	223.95	19.9	73.22	27.98	115.06	34.57
64.8685	76	946	0.58	224.22	18.61	73.46	24.08	115.41	37.91
65.1365	78.71	948	0.33	224.48	17.9	73.69	20.28	115.75	43.36
65.1365	93	950	0.06	224.75	17.46	73.93	19.28	116.61	42.96
65.3151	85.7	952	-0.2	225.01	18.04	74.17	21.9	116.95	42.56
65.5831	76.44	954	-0.3	225.28	18.66	74.41	24.62	117.3	44.68
65.5831	91	956	-0.26	225.48	18.51	74.56	24.76	117.64	43.02
65.7617	71.7	958	-0.18	225.74	18.51	74.8	23.14	117.98	43.8
66.0297	61.77	960	-0.14	226.93	17.46	75.04	24.04	118.33	40.62
66.0297	89.7	962	-0.08	227.2	16.97	75.28	25.45	118.67	39.97
66.2083	67.3	964	0	227.46	17.03	75.52	27.31	119.01	38.68
66.4763	93	966	0.02	227.72	16.46	75.68	26.55	119.36	37.28
66.4763	96.2	968	-0.09	227.98	17.28	75.92	26.48	119.7	32.08
66.655	83	970	-0.26	228.25	16.99	76.16	26.36	120.04	27.69
66.9229	99.3	972	-0.37	228.51	18.47	76.4	27.11	120.39	28.15
66.9229	101.83	974	-0.56	228.77	18.12	76.64	27.39	120.73	32.64
67.1016	100.3	976	-0.55	229.03	18.58	76.88	28.24	120.9	27.9
67.3695	100.86	978	-0.54	229.29	17.95	77.04	27.38	141.77	21.56
67.3695	103.3	980	-0.56	229.55	17.78	77.84	25.74	142.1	14.75
67.5482	103.3	982	-0.49	229.81	18.54	78.08	24.15	142.44	16.58
67.8161	82.3	984	-0.48	230.07	17.61	78.32	23.97	142.78	15.89
67.8161	107.3	986	-0.48	230.33	17.74	78.56	22.96	143.12	14.72
67.9948	83.7	988	-0.62	230.59	16.74	78.73	22.83	143.46	14.49
68.2627	54.63	990	-0.77	230.85	17.34	78.97	22.57	143.8	13.06
68.2627	111	992	-0.85	231.11	16.99	79.21	22.91	144.14	14.22
68.4414	96	994	-0.87	231.37	17.2	79.45	22.85	144.47	14.48
68.6963	78.97	996	-0.93	231.63	17.67	79.61	23.33	144.81	15.89
68.6963	113	998	-0.96	231.89	18.59	79.86	24	145.15	14.62
68.849	68	1000	-0.84	232.15	18.59	80.1	25.16	145.49	13.05
69.0779	95.41	1002	-0.75	232.4	18.95	80.34	25.42	145.83	12.88
69.0779	116.7	1004	-0.68	232.66	18.84	80.59	25.02	146.16	14.76
69.2306	92.7	1006	-0.47	232.92	18.87	80.75	24.75	146.5	15.4
69.4596	117.05	1008	-0.4	233.18	19.11	80.99	24.67	146.84	15.79
69.4596	118.3	1010	-0.42	233.43	19.29	81.24	26.07	147.17	12.89
69.6122	39.7	1012	-0.6	233.69	20.05	81.48	26.23	147.51	12.78
69.6122	63	1014	-0.76	233.95	20.26	81.64	26.24	147.85	12.85
69.8412	114.08	1016	-0.82	234.2	20.15	81.89	25.39	148.18	14.03
69.8412	123	1018	-0.93	234.46	19.67	82.13	25.51	148.52	12.6
69.9938	111	1020	-1.06	234.71	19.05	82.38	25.36	148.86	11.61
70.2228	102.82	1022	-1.2	234.97	19.19	82.54	23.07	149.19	11.05
70.2228	127.7	1024	-1.18	235.22	19.09	82.78	22.46	149.53	11.72
70.3754	107	1026	-1.16	235.48	19.72	83.03	22.28	149.86	11.69
70.6044	97.56	1028	-1.08	235.73	18.57	83.27	24.28	150.2	12.06
70.6044	119.7	1030	-1.05	235.99	19.51	83.44	24.06	150.53	11.35
70.7571	99	1032	-0.98	236.62	20.9	83.68	24.62	150.87	12.08
70.986	38	1034	-0.87	236.87	26.14	83.93	25.69	151.2	12.3
70.986	113.3	1036	-0.77	237.13	27.74	84.18	24.82	151.54	12.93
71.1387	95	1038	-0.58	237.38	32.37	84.34	24.42	151.87	12.18
71.3676	95	1040	-0.45	237.63	33.77	84.59	25.01	152.21	12.78
71.3676	107	1042	-0.3	237.88	37.91	84.83	28.13	152.54	14.42
71.5203	96.3	1044	-0.15	238.13	32.95	85.08	28.88	152.71	15.41
71.7493	86	1046	0	238.39	31.39	85.24	26.79	153.38	14.35
71.7493	100	1048	0.16	238.64	27.33	85.49	24.61	153.71	12.34
71.9019	86.3	1050	0.39	238.89	27.94	86.31	23.51	154.04	11.21
72.1309	83.3	1052	0.75	239.14	24.12	86.48	22.88	154.38	10.79
72.1309	94.7	1054	1.06	239.39	22.3	86.73	22.87	154.71	10.86
72.2835	76.7	1056	1.34	239.64	21.6	86.97	20.73	155.04	10.65
72.5125	82	1058	1.39	239.89	20.74	87.14	22.21	155.37	9.1
72.5125	97	1060	1.16	240.14	20.85	87.39	21.48	155.71	8.89
72.6651	81	1062	0.64	240.39	19.13	87.64	22.78	156.04	7.92
72.8941	87.3	1064	-0.17	240.64	19.19	87.88	22.4	156.37	8.58
72.8941	95.7	1066	-0.86	240.89	18.76	88.05	21.84	156.7	7.48
73.0468	91	1068	-1.19	241.14	19.88	88.3	23.89	157.03	6.4
73.2757	79.3	1070	-1.34	241.39	20.82	88.55	24.54	157.37	6.98
73.2757	99.7	1072	-1.33	241.63	21.24	88.71	26.71	157.7	8.52
73.4284	98.3	1074	-1.36	241.88	20.45	88.96	26.67	158.03	11.01
73.6574	72	1076	-1.35	242.13	17.43	89.21	26.77	158.36	11.54
73.6574	106.3	1078	-1.34	242.38	16.37	89.38	26.1	158.69	11.85
73.81	105	1080	-1.34	242.63	14.51	89.63	25.24	159.02	12.36
74.039	64.7	1082	-1.35	242.87	18.19	89.88	24.13	159.35	12.67
74.039	110.3	1084	-1.39	243.12	17.92	90.04	24.02	159.68	13.47
74.1916	106	1086	-1.33	243.37	19.47	90.29	24.52	160.01	13.81
74.4206	60.3	1088	-1.31	243.61	20.28	90.54	25.38	160.34	13.54
74.4206	114.3	1090	-1.25	243.86	22.9	90.79	26.47	160.67	11.63
74.5732	112.7	1092	-1.08	244.11	25.45	90.96	24.82	161	11.65
74.8022	55.3	1094	-0.88	244.35	25.03	91.21	23.3	161.32	12.27
74.8022	114.7	1096	-0.62	244.6	22.33	91.46	22.94	161.65	13.41
74.9549	112.7	1098	-0.39	244.72	19.1	91.63	24.83	161.98	13.99
75.1838	50.3	1100	-0.43	256.08	17.71	91.88	26.18	162.31	14.82
75.1838	114.7	1102	-0.36	256.32	19.76	92.13	29.15	162.64	16.1
75.3365	108	1104	-0.46	256.56	20.75	92.29	30.75	162.96	14.62
75.5654	21.3	1106	-0.63	256.79	21.4	92.54	32.38	163.29	14.72
75.5654	22	1108	-0.64	257.03	20.01	92.8	32.27	163.62	14.8
75.5654	115	1110	-0.6	257.26	20.19	92.96	33.68	163.95	16.28
75.7181	114.7	1112	-0.45	257.5	18.83	93.21	33.27	164.27	15.58
75.9471	59	1114	-0.33	257.73	17.94	93.47	32.83	164.6	14.33
75.9471	119	1116	-0.15	257.97	16.91	93.63	31.83	164.92	13.69
76.0997	115.7	1118	0.15	258.2	18.54	94.64	33.39	165.09	13.22
76.3287	70.3	1120	0.35	258.44	19.4	94.89	31.87	165.74	13.5
76.3287	112	1122	0.65	258.67	21.67	95.06	31.8	166.06	13.74
76.4813	109.3	1124	0.89	258.91	20.55	95.31	31	166.39	14.03
76.7103	83.7	1126	1.18	259.14	20.97	95.57	31.58	166.71	14.17
76.7103	122.3	1128	1.5	259.38	18.88	95.73	31.13	166.71	11.94
76.8629	117.7	1130	1.79	259.61	18.2	95.99	31.63	167.04	10.3
77.0919	95.3	1132	2.01	259.9	17.93	96.15	32.36	167.36	10.29
77.0919	120.7	1134	2.07	260.13	18.23	96.41	32.21	167.69	12.09
77.2446	114.3	1136	1.96	260.37	19.6	96.66	32.88	168.01	13.59
77.4735	102.3	1138	1.57	260.6	19.01	96.83	32.63	168.33	13.82
77.4735	111	1140	1.23	260.83	20.2	97.08	34.35	168.66	12.95
77.6262	101.7	1142	0.88	261.07	19.42	97.33	35.21	168.98	13.68
77.8551	100	1144	0.64	261.3	20.82	97.5	35.58	169.3	13.44
77.8551	105.7	1146	0.62	261.53	20.68	97.76	34.01	169.63	15.28
78.0078	95.7	1148	0.58	261.77	22.13	97.93	29.84	169.95	15.49
78.2368	105.3	1150	0.5	262	20.79	98.18	30.15	170.27	16.22
78.2368	109	1152	0.4	262.23	21.14	98.43	30.88	170.59	15.96
78.3894	104.7	1154	0.2	262.46	18.91	98.6	34.04	170.91	15.72
78.6184	106	1156	-0.11	262.69	18.77	98.86	33.12	171.24	15.01
78.6184	112.3	1158	-0.36	262.93	18.48	99.02	32.4	171.56	14.6
78.771	98	1160	-0.66	263.16	18.81	99.28	33.35	171.88	14.09
79	93.7	1162	-0.89	263.39	18.51	99.53	34.03	172.2	14.55
79	114	1164	-0.99	263.51	18	99.7	37.02	172.52	14.92
79.1356	84.3	1166	-0.95	264.95	18.24	99.96	36.04	172.84	15.48
79.3389	87	1168	-1.03	265.18	19.07	100.12	35.56	173.16	15.38
79.3389	109.7	1170	-1.02	265.41	18.78	100.38	32.6	173.48	15.88
79.4744	81.7	1172	-1.06	265.64	18.77	100.63	33.08	173.8	16.36
79.6778	88.3	1174	-1.03	265.87	18.35	100.8	32.81	174.11	16.81
79.6778	91	1176	-1.1	266.1	17.64	101.06	34.28	174.43	16.82
79.8133	84	1178	-1.19	266.33	17.2	101.23	35.16	174.75	16.59
80.0167	70	1180	-1.23	266.56	16.65	101.48	35.95	175.07	17.15
80.0167	90.7	1182	-1.25	266.79	17.12	101.65	34.74	175.39	17.08
80.1522	85.7	1184	-1.2	267.02	17.6	101.91	33.65	175.7	17.16
80.3556	74.7	1186	-1.15	267.25	17.35	102.93	32.74	176.02	16.63
80.3556	90.7	1188	-1.1	267.48	16.86	103.1	33.82	176.34	14.78
80.4911	82.3	1190	-0.93	267.71	14.29	103.35	34.08	176.66	15.27
80.6944	84.3	1192	-0.9	267.94	12.3	103.52	34.9	177.76	15.45
80.6944	91.7	1194	-0.7	268.17	12.26	103.78	34.6	178.08	18.23
80.83	27	1196	-0.62	268.4	12.73	103.95	34.67	178.39	18.33
80.83	50.3	1198	-0.54	268.63	14.71	104.2	34.5	178.71	18.57
81.0333	91.7	1200	-0.4	268.92	14.38	104.46	33.66	179.02	17.8
81.0333	91.7	1202	-0.21	269.15	16.02	104.63	31.48	179.34	17.84
81.1689	83.7	1204	0.12	269.38	16.65	104.88	30.91	179.65	18.19
81.3722	87	1206	0.57	269.61	17	105.05	30.71	179.96	18.87
81.3722	88.3	1208	1.13	269.83	16.68	105.31	30.62	180.28	18.77
81.5078	86	1210	1.54	270.06	16.4	105.48	28.76	180.59	18.11
81.7111	84	1212	1.72	270.29	16.19	105.74	27.45	180.9	17.81
81.7111	92.3	1214	1.72	270.52	17.11	105.91	26.19	181.22	17.44
81.8467	91.3	1216	1.56	270.75	17.65	106.16	26.74	181.53	16.9
82.05	30.02	1218	1.25	270.98	18.06	106.33	26.26	181.84	16.38
82.05	81.3	1220	0.92	271.21	17.61	106.59	27.02	182.15	16.93
82.1856	89	1222	0.75	271.43	17.82	106.76	26.03	182.46	17.92
82.3889	75.7	1224	0.62	271.66	18.14	107.02	23.16	182.77	18.13
82.3889	90.74	1226	0.49	271.89	17.51	107.19	21.9	183.08	16.67
82.5244	91.3	1228	0.28	272.12	16.51	107.44	21.43	183.4	14.71
82.7278	74.7	1230	0.08	272.23	16.15	107.7	24.61	183.71	14.68
82.7278	98.36	1232	-0.16	272.75	17.44	107.87	23.19	184.02	15.95
82.8633	97	1234	-0.44	272.97	17.73	108.13	24.4	184.33	18.62
83.0667	88	1236	-0.67	273.2	18.35	108.3	24.64	184.63	20.81
83.0667	104.08	1238	-0.82	273.43	18.11	108.55	28.26	184.94	21.1
83.2022	102	1240	-0.85	273.66	18.56	108.72	28.15	185.25	20.66
83.4056	98.3	1242	-0.75	273.89	18.68	108.98	27.86	185.56	19.37
83.4056	108.4	1244	-0.56	274.11	18.51	109.15	27.7	185.87	19.44
83.5411	101	1246	-0.31	274.34	18.52	109.41	27.14	186.18	19.86
83.7444	99	1248	-0.11	274.57	17.84	109.58	28.58	186.48	19.01
83.7444	104.41	1250	0.11	274.8	17.6	109.84	28.18	186.79	19.12
83.88	114	1252	0.28	275.02	17.2	110.01	26.72	187.1	19.37
84.0833	104.3	1254	0.39	275.25	17.17	110.95	22.71	187.41	19.44
84.0833	119.13	1256	0.44	275.48	17.34	111.21	21.47	187.71	19.36
84.2189	99	1258	0.47	275.71	17.06	111.38	23.01	189.01	18.61
84.4222	110.85	1260	0.47	275.93	17.14	111.63	24.74	189.31	19.05
84.4222	124	1262	0.55	276.22	16.21	111.81	24.79	189.62	17.16
84.5578	100.7	1264	0.75	276.44	15.15	112.06	25.97	189.92	15.84
84.7611	111.17	1266	0.88	276.67	13.62	112.23	27.05	190.23	14.74
84.7611	124	1268	0.94	276.9	12.79	112.49	27.57	190.53	16.68
84.8967	104.7	1270	0.82	277.13	13.68	112.66	26.9	190.83	17.62
85.1	117.19	1272	0.54	277.35	15.2	112.92	26.43	191.14	18.87
85.1	121.7	1274	0	277.58	17.4	113.09	23.23	191.44	18.94
85.2356	118	1276	-0.35	277.81	17.76	113.35	22.88	191.74	18.91
85.4389	117.7	1278	-0.49	278.03	17.32	113.52	22.92	192.04	18.37
85.4389	124.21	1280	-0.59	278.26	16.83	113.61	30.08	192.35	18.21
85.5744	120.3	1282	-0.56	278.49	16.73	127	32.59	192.65	16.45
85.7778	111.3	1284	-0.56	278.71	17.18	127.17	37.49	192.95	16.36
85.7778	121.94	1286	-0.64	278.94	16.94	127.43	36.17	193.25	15.52
85.9133	108.7	1288	-0.56	279.17	15.74	127.6	37.77	193.55	17.03
86.1167	36.3	1290	-0.36	279.4	16.62	127.77	36.6	193.85	17.18
86.1167	60	1292	-0.1	279.68	16.96	128.03	36.74	194.15	17.58
86.1167	118.56	1294	0.04	279.91	19.99	128.2	36.03	194.45	17.58
86.2522	126.7	1296	0.2	280.13	19.73	128.37	35.66	194.75	17.4
86.4526	99.3	1298	0.46	280.36	21.49	128.63	36.25	195.05	16.94
86.4526	149.99	1300	0.71	280.59	23.09	128.8	32.82	195.35	15.42
86.5852	155.7	1302	1.02	280.81	24.71	128.97	31.92	195.64	15.56
86.7841	100.7	1304	0.91	280.93	24.83	129.14	30.73	195.94	15.93
86.7841	149.62	1306	0.34	281.38	22.42	129.4	32.83	196.24	18.47
86.9167	169.3	1308	-0.31	281.61	22.05	129.57	28.17	196.54	17.67
87.1156	98.7	1310	-0.64	281.83	19.17	129.74	27.76	196.83	17.53
87.1156	165.06	1312	-0.74	282.06	17.81	130	27.42	197.13	15.24
87.2481	147	1314	-0.74	282.29	15.09	130.17	31.58	197.43	15.97
87.447	98.3	1316	-0.68	282.52	17.49	130.34	29.47	197.72	16.12
87.447	146.09	1318	-0.62	282.8	17.69	130.6	30.9	198.02	17.75
87.5796	135.3	1320	-0.52	283.03	18.52	130.77	30.49	198.31	17.95
87.7785	100.7	1322	-0.36	283.25	18.29	130.94	33.33	198.61	17.98
87.7785	139.42	1324	-0.14	283.48	18.46	131.11	32.35	198.9	18.41
87.9111	142.3	1326	0.14	283.71	18.12	131.37	32.82	199.2	19.66
88.11	101.3	1328	0.43	283.93	16.38	131.54	31.52	200.23	21.32
88.11	155.45	1330	0.71	284.16	17.7	131.71	31.89	200.52	22.62
88.2426	156	1332	0.93	284.39	19.61	131.97	30.06	200.81	22.59
88.4415	100	1334	1.16	284.61	19.61	132.14	28.59	201.1	22.2
88.4415	171.18	1336	1.4	284.84	19.64	132.31	23.62	201.4	21.82
88.5741	167	1338	1.74	285.07	17.78	132.48	20.32	201.69	21.97
88.773	94	1340	2.02	285.3	17.81	132.74	21.19	201.98	21.89
88.773	172.21	1342	2.25	285.52	16.58	132.91	21.83	202.27	21.73
88.9056	162.3	1344	2.21	285.81	17.73	133.08	27.33	202.56	21.67
89.1044	72	1346	1.94	286.03	18.18	133.33	24.77	202.85	21.98
89.1044	166.54	1348	1.3	286.26	19.27	133.5	27.58	203.14	23.23
89.237	156	1350	0.65	286.49	19.77	134.36	24.64	203.43	24.4
89.4359	74.3	1352	-0.08	286.72	21.06	134.53	26.76	203.72	24.43
89.4359	167.58	1354	-0.45	286.94	22.39	134.96	29.07	204.01	23.01
89.5685	163	1356	-0.68	287.17	20.69	135.3	32.93	204.3	21.06
89.7674	85	1358	-0.79	287.4	20.63	135.47	37.39	204.59	20.1
89.7674	172.31	1360	-0.81	287.63	19.72	135.72	37.63	204.88	20.03
89.9	166	1362	-0.79	287.85	20.25	135.9	39.74	205.02	22.16
90.0989	84	1364	-0.58	288.08	18.79	136.07	37	209.02	28.4
90.0989	181.65	1366	-0.48	288.31	17.62	136.24	41.63	209.31	28.18
90.2315	176.3	1368	-0.45	288.54	17.22	136.49	41.99	209.59	28.39
90.4304	86	1370	-0.46	288.82	16.76	136.66	49.08	209.87	27.1
90.4304	180.68	1372	-0.46	289.05	17.99	136.83	46.37	210.15	30.05
90.563	165.7	1374	-0.33	289.28	20.19	137	46.87	210.44	31.26
90.7619	94.3	1376	-0.21	290.07	21.67	137.26	41.33	210.72	30
90.7619	165.42	1378	-0.06	290.3	22.73	137.43	42.72	211	29.92
90.8944	56.02	1380	0.26	290.53	20.53	137.6	41.17	211.28	29.67
91.0933	97	1382	0.72	290.76	21.32	137.77	42.56	211.56	29.29
91.0933	170.76	1384	1.29	290.99	20.16	137.94	38.98	211.84	30.15
91.2259	158.34	1386	1.49	291.21	21.89	138.2	37.44	212.12	29.54
91.4248	110.3	1388	0.92	291.44	21.37	138.37	34.11	212.4	27.28
91.4248	156.79	1390	0.39	291.67	21.21	138.54	33.32	212.68	27.82
91.5574	156.76	1392	-0.09	291.96	20.71	138.71	31.66	212.96	26.59
91.7563	113.7	1394	-0.28	292.19	20.7	138.96	28.62	213.24	27.43
91.7563	137.83	1396	-0.67	292.41	20.7	139.13	25.67	213.52	23.69
91.8889	133.38	1398	-0.77	292.64	20.48	139.3	25.96	213.8	23.47
92.0878	42.3	1400	-0.77	292.87	20.35	139.47	26.05	214.08	21.87
92.0878	69.16	1402	-0.7	293.1	20.56	139.64	24.92	214.35	21.43
92.0878	102.3	1404	-0.65	293.33	20.49	139.9	21.1	214.63	20.02
92.2204	140.8	1406	-0.49	293.56	20.79	140.07	21.16	214.91	19.7
92.4193	93	1408	-0.29	293.79	20.56	140.24	21.71	215.19	19.24
92.4193	122	1410	-0.14	294.02	20.9	140.41	23.27	215.46	18.83
92.5519	123.82	1412	0.11	294.25	21	140.58	23.53	215.74	18.38
92.7507	87.3	1414	0.33	294.48	19.85	141.43	22.12	216.01	18.47
92.7507	119.3	1416	0.55	294.76	20.07	141.6	19.55	216.29	18.45
92.8833	118.83	1418	0.76	294.99	19.73	141.85	18.15	216.57	18.56
93.0822	91	1420	0.76	295.22	21	142.02	17.85	216.84	18.33
93.0822	110.3	1422	0.61	295.45	20.56	142.19	18.13	217.11	18.16
93.2148	111.15	1424	0.55	295.68	20.16	142.36	17.73	217.39	15.84
93.4137	89	1426	0.38	295.91	19.46	142.53	17.48	217.66	13.8
93.4137	114.3	1428	0.25	296.14	18.93	142.7	16.34	217.94	13.04
93.5591	112.17	1430	0.11	296.37	18.86	142.95	15.01	218.21	14.18
93.7965	92	1432	-0.02	296.6	18.11	143.12	13.48	218.48	16.48
93.7965	123	1434	-0.13	296.83	18.69	143.29	14.8	218.76	16.57
93.9548	119.49	1436	-0.13	297.06	18.41	143.46	14.33	219.44	16.08
94.1922	103	1438	-0.17	297.3	19.53	143.63	17.08	219.71	14.59
94.1922	137.3	1440	-0.28	297.53	19.26	143.8	17.59	219.98	14.41
94.3504	133.91	1442	-0.32	297.81	19.88	144.05	20.48	220.25	14.8
94.5878	101.7	1444	-0.31	298.05	19.07	144.22	20.52	220.52	16.22
94.5878	144.7	1446	-0.28	298.28	18.8	144.39	20.6	220.79	15.85
94.7461	142.54	1448	-0.27	298.39	17.6	144.56	20.08	221.06	14.93
94.9835	102.7	1450	-0.16	298.86	17.31	144.73	20	221.33	13.03
94.9835	151	1452	0.02	299.09	17.19	144.9	19.53	221.6	13.22
95.1417	145.57	1454	0.32	299.32	17.36	145.07	19.43	221.87	15.07
95.3791	121.3	1456	0.73	299.55	17.89	145.32	19.12	222.14	16.4
95.3791	164	1458	1.03	299.78	18.16	145.49	19.49	222.41	16.77
95.5374	152.29	1460	1.24	300.01	18.67	145.66	19.85	222.68	15.28
95.7748	124.7	1462	1.11	300.25	18.89	145.83	20.08	222.95	15.49
95.7748	179.7	1464	0.91	300.48	18.5	145.99	19.64	223.21	15.9
95.933	154.62	1466	0.68	300.77	18.52	146.16	20.11	223.48	18.07
96.1704	156	1468	0.44	301	16.83	146.33	19.95	223.75	18.76
96.1704	178.3	1470	0.36	301.23	17.29	146.5	20.19	224.02	18.62
96.3287	172.06	1472	0.3	301.47	15.81	146.75	19.68	224.28	18.59
96.5661	47.7	1474	0.25	301.7	18.03	146.92	19.7	224.55	17.95
96.5661	62.3	1476	0.24	301.93	18.41	147.09	20.07	224.81	18.51
96.5661	174.3	1478	0.15	302.17	21.16	147.26	19.72	225.08	17.75
96.7243	168.4	1480	-0.05	302.4	19.77	147.43	20.57	225.35	18.19
96.9617	141.3	1482	-0.26	302.63	19.81	147.6	20.53	225.61	18.17
96.9617	158	1484	-0.6	302.87	18.76	148.27	19.2	225.88	19
97.12	157.73	1486	-0.9	303.1	19.97	148.44	18.82	226.14	18.62
97.3574	75.7	1488	-1.03	303.33	19.07	148.6	18.72	226.4	19.42
97.3574	163.3	1490	-1.12	303.63	17.04	148.77	20.46	226.67	19.08
97.5157	156.16	1492	-1	303.86	14.19	148.94	20.58	226.93	20.03
97.753	165.7	1494	-0.88	304.09	13.55	149.11	21.04	227.2	20.05
97.9113	158.79	1496	-0.67	304.33	14.76	149.28	21.1	227.46	21.18
98.1487	165.7	1498	-0.48	304.56	17.6	149.44	20.71	227.72	18.81
98.307	145.22	1500	-0.29	304.8	16.5	149.61	20.23	227.98	19.31
98.5443	176	1502	-0.16	305.03	17.07	149.78	20.08	228.25	18.7
98.7026	134.85	1504	0.2	305.27	15.59	150.03	17.98	228.51	21.26
98.94	168.7	1506	0.21	312.7	18.04	150.2	18.05	228.77	21.61
99.0694	121.88	1508	0.27	313	18.24	150.37	18.22	228.9	23.84
99.2634	158.3	1510	0.15	313.24	18.36	150.53	19.76	229.42	23.49
99.3928	113.92	1512	0.05	313.48	18.16	150.7	19.49	229.68	22.69
99.5868	140.7	1514	0.07	313.72	18.07	150.87	19.43	229.94	21.13
99.7162	118.35	1516	-0.16	313.96	18.11	151.04	19.66	230.2	21.95
99.9103	127	1518	-0.52	314.2	18.68	151.2	19.33	230.46	22.56
100.04	119.99	1520	-0.68	314.44	18.72	151.37	18.77	230.72	21.98
100.234	117	1522	-0.78	314.69	19.04	151.54	16.88	230.98	21.14
100.363	113.02	1524	-0.83	314.93	18.87	151.71	17.16	231.24	20.3
100.557	109.7	1526	-0.77	315.17	18.89	151.87	17.41	231.5	21.29
100.686	112.76	1528	-0.72	315.41	18.6	152.04	18.96	231.76	21.75
100.881	118	1530	-0.6	315.66	18.32	152.29	19.19	232.02	22.14
101.01	107.49	1532	-0.51	315.9	18.13	152.46	18.98	232.28	18.86
101.075	70.32	1534	-0.22	316.2	18.34	152.63	19.14	232.53	18.5
101.204	133	1536	0.56	316.45	18.34	152.79	18.44	232.79	18.33
101.333	108.13	1538	0.89	316.69	18.5	152.96	18.32	233.05	20.33
101.398	89.34	1540	1.2	316.93	18.52	153.13	18.51	233.31	21.04
101.527	70.3	1542	1.51	317.18	18.84	153.29	18.83	233.56	22.95
101.657	30.98	1544	1.71	317.42	19.54	153.46	18.8	233.82	24.89
101.657	52.86	1546	1.91	317.67	17.85	153.63	18.74	234.07	26.7
101.721	71.06	1548	2.29	317.91	17.82	153.79	18.68	234.33	27
101.98	109.96	1550	2.68	318.16	16.84	153.96	19.25	234.59	27.84
102.045	113.08	1552	3.04	318.4	18.98	154.13	18.17	234.84	29.59
102.304	113.94	1554	3.32	319.14	19.48	154.71	17.1	235.1	30.67
102.368	132.4	1556	2.75	319.14	20.39	154.88	15.63	235.35	32.62
102.627	114.92	1558	1.34	319.38	20.13	155.04	13.56	235.6	31.49
102.692	137.12	1560	-0.05	319.69	19.96	155.21	13.15	235.86	32.95
102.95	133.2	1562	-0.63	319.94	20.11	155.37	12.89	236.11	34.13
103.015	135.13	1564	-0.81	320.18	20.17	155.54	14.69	236.37	37.27
103.274	129.88	1566	-0.81	320.43	19.69	155.71	14.74	236.62	39.42
103.338	117.15	1568	-0.7	320.68	19.24	155.87	14.59	236.87	39.86
103.597	112.86	1570	-0.49	320.92	18.97	156.04	14.36	237.13	38.58
103.662	106.47	1572	-0.43	321.17	19.28	156.21	14.33	237.38	37.32
103.921	101.84	1574	-0.55	321.42	19.7	156.37	14.29	237.63	35.29
103.985	98.19	1576	-0.66	321.67	20.03	156.54	14.15	237.88	35.65
104.267	76.13	1578	-0.59	321.91	20.08	156.7	13.59	238.13	35.57
104.34	48.21	1580	-0.31	322.16	17.81	156.87	13.28	238.39	40.13
104.63	129.81	1582	-0.21	322.41	17.81	157.03	12.68	239.01	41.19
104.703	77.24	1584	-0.08	322.66	17.68	157.2	12.6	239.27	37.5
104.993	24.7	1586	0.02	322.91	19.92	157.37	12.51	239.52	34.13
104.993	76.79	1588	-0.01	323.22	19.91	157.53	12.53	239.77	32.31
105.065	68.26	1590	0.07	323.47	20.33	157.7	12.43	240.02	37.14
105.355	52.75	1592	0.21	323.72	20.49	157.86	12.08	240.27	38.09
105.355	98.3	1594	-0.43	323.97	20.44	158.03	11.81	240.52	38.7
105.427	40.29	1596	-0.54	324.22	20.27	158.19	12.17	240.76	37.85
105.718	52.73	1598	-0.7	324.47	19.62	158.36	12.5	241.01	37.39
105.718	102.7	1600	-0.51	324.72	18.94	158.52	13.01	241.26	37.13
105.79	51.32	1602	-0.5	324.97	18.47	158.69	12.94	241.51	35.78
106.08	71.7	1604	-0.31	325.22	18.39	158.85	13.14	241.76	34.7
106.08	76	1606	-0.12	325.47	18.86	159.02	13.4	242.01	32.91
106.153	59.36	1608	0.1	325.72	19.53	159.18	13.51	242.25	32.72
106.442	54.3	1610	0.34	325.98	20.18	159.35	13.66	242.5	31.56
106.442	105.37	1612	0.54	326.23	21.33	159.51	14.12	242.75	30.34
106.515	67.69	1614	0.6	326.48	22.3	159.68	14.62	243	28.55
106.805	66.7	1616	0.77	326.73	22.95	159.84	14.71	243.24	26.24
106.805	80.32	1618	1.03	327.05	22.58	160.01	14.55	243.49	25.26
106.877	83.12	1620	1.41	327.3	22.06	160.17	14.36	243.74	23.11
107.168	52	1622	1.82	327.55	21.11	166.8	17.24	243.98	22.6
107.168	57.89	1624	2.04	327.81	20.27	166.96	17.13	244.23	24.63
107.24	112.45	1626	2.29	328.7	19.86	167.12	16.91	244.47	26.1
107.53	62.26	1628	2.59	328.95	19.35	167.28	17.19	244.72	28.57
107.53	64.3	1630	2.74	329.2	18.95	167.44	17.43	244.97	26.12
107.578	117.78	1632	2.74	329.46	18.93	167.61	17.42	245.21	27.27
107.77	106.53	1634	2.45	329.71	18.45	167.69	17.05	245.46	25.4
107.77	130.7	1636	1.66	329.97	18.5	167.85	16.61	245.7	25.5
107.818	116.81	1638	1.1	330.23	18.1	168.01	16.53	245.94	20.79
108.01	90.3	1640	0.55	330.48	18.39	168.17	14.77	246.19	20.1
108.01	133.5	1642	0.39	330.74	19.27	168.33	15.11	246.43	19.95
108.058	117.24	1644	0.55	331.06	18.51	168.5	15.13	246.68	21.57
108.25	43.7	1646	0.74	331.31	19.19	168.66	18.24	246.92	20.58
108.25	102.47	1648	1.06	331.57	17.9	168.74	18.5	247.16	18.86
108.278	105.88	1650	1.66	331.83	17.72	168.9	18.44	247.41	18.92
108.389	46.44	1652	2.08	332.08	17.25	169.06	17.37	248.26	16.52
108.389	62.7	1654	1.73	332.34	16.88	169.22	17.34	248.5	16.18
108.417	116.31	1656	1.26	332.6	17.08	169.38	17.78	248.74	14.92
108.529	55.7	1658	0.71	332.86	17.17	169.38	18.13	248.98	16.63
108.529	68.7	1660	0.49	333.12	17.52	169.55	18.14	249.22	16.69
108.557	108.95	1662	0.55	333.37	17.55	169.71	18.15	249.46	16.49
108.668	23.7	1664	0.61	333.63	16.97	169.79	18.79	249.71	14.45
108.668	42.06	1666	0.7	333.89	17.51	169.87	20.71	249.95	14.24
108.696	98.99	1668	0.76	334.15	17.24	166.31	23.14	250.19	14.56
108.807	30.03	1670	0.65	334.41	17.77	166.47	24.15	250.43	16.79
108.807	42.7	1672	0.55	334.67	16.85	166.63	24.54	250.67	17.22
108.835	85.02	1674	0.37	334.93	16.39	166.8	23.84	250.91	17.21
108.947	32.7	1676	0.08	335.19	15.74	166.96	22.9	251.15	17
108.947	47.99	1678	0.12	335.45	15.66	167.12	20.36	251.39	16.98
108.975	77.46	1680	0.15	335.77	16.46	167.28	18.88	251.63	16.8
109.086	52.25	1682	0.18	336.04	16.16	167.44	18.43	251.87	16.89
109.086	70.7	1684	0.29	336.3	16.02	167.61	18.72	252.11	16.58
109.114	80.49	1686	0.24	336.56	15.29	167.69	18.86	252.34	16.78
109.225	77.22	1688	0.07	336.82	16.21	167.85	19.03	252.58	16.59
109.225	82.7	1690	-0.19	337.08	16.52	168.01	19.47	252.82	16.66
109.253	61.53	1692	-0.29	337.34	17.64	168.17	19.65	253.06	16.35
109.365	75.18	1694	-0.23	337.6	16	168.33	19	253.3	15.82
109.365	79	1696	0.08	337.87	13.57	168.5	18.43	253.54	15.14
109.393	16	1698	0.44	338	12.63	168.66	17.5	253.77	14.71
109.393	18.86	1700	0.74	338.52	13.71	168.74	16.83	254.01	14.36
109.504	36.14	1702	1.35	338.79	15.77	168.9	15.87	254.25	14.25
109.504	43.7	1704	1.61	339.05	15.42	169.06	17.46	254.49	14.25
109.532	69	1706	1.44	339.31	14.59	169.22	19.05	254.72	14.5
109.643	22	1708	1.25	339.58	15.59	169.38	21.49	254.96	14.46
109.643	62	1710	0.62	339.84	16.86	169.55	21.86	255.2	14.23
109.671	85	1712	-0.27	340.11	17.29	169.71	22.89	255.43	14.21
109.783	65.3	1714	-0.67	340.37	16.39	169.79	23	255.67	16.71
109.783	88	1716	-0.66	340.64	15.29	169.95	23.03	257.2	16.68
109.811	93.7	1718	-0.57	340.97	15.33	170.11	22.73	257.44	17.51
109.922	41	1720	-0.46	341.23	15.86	170.27	20.58	257.67	16.08
109.922	47	1722	-0.42	341.5	16.42	170.43	20.91	257.91	16.95
109.95	105.7	1724	-0.35	341.76	16.51	170.59	19.11	258.14	17.02
110.061	54.3	1726	-0.45	342.03	16.12	170.67	21.82	258.38	16.83
110.061	75	1728	-0.28	342.3	16.45	170.83	22.02	258.61	16.73
110.089	107.7			342.56	17.49	170.99	23.48	258.85	16.13
110.201	67			342.83	18.56	171.15	23.2	259.08	15.73
110.201	72.3			343.1	18.96	171.32	22.59	259.32	15.11
110.229	115.3			343.36	18.68	171.48	21.75	259.55	14.92
110.34	81.7			343.63	18.49	171.96	20.83	271.95	21.25
110.34	115.3			343.9	17.92	172.12	19.65	272.18	19.95
110.363	121			344.17	18.49	172.28	19.57	272.4	18.27
110.453	123			344.44	19.21	172.36	19.07	272.63	16.92
110.453	124			344.7	20.38	172.52	19.79	272.86	16.6
110.476	129			344.97	20.55	172.68	20.5	273.09	16.17
110.566	120.3			345.24	19.81	172.84	20.78	273.32	15.13
110.566	127.3			345.51	20	173	20.08	273.54	14.94
110.589	138.3			345.78	19.96	173.08	19.15	273.77	14.1
110.679	118			346.05	20.25	173.24	18.49	274	15.09
110.679	122.7			346.32	19	173.4	18.08	274.23	13.27
110.702	145			346.59	18.4	173.56	17.89	274.45	14.04
110.792	113			346.86	17.12	173.72	17.8	274.68	13.53
110.815	149.3			347.13	16.74	173.8	16.11	274.91	14.83
110.905	40.3			347.47	16.04	173.95	16.19	275.14	14.74
110.905	94			347.74	18.27	174.11	14.35	275.36	14.99
110.928	142.3			348.69	19.04	174.27	16.93	275.59	16.23
111.018	87			348.96	19.49	174.43	15.69	275.82	17.31
111.018	114.3			349.23	18.43	174.51	18.59	276.05	17.98
111.041	107.3			349.5	18.54	174.67	18.97	276.27	16.12
111.131	88.3			349.77	17.26	174.83	21.15	276.5	14.32
111.131	100.7			350.05	17.97	174.99	21.46	276.73	14.11
111.154	101			350.32	18.12	175.15	19.01	276.95	15.7
111.245	73			350.59	20.04	175.23	18.69	277.18	16.8
111.245	89.7			350.87	20.06	175.39	18.29	277.41	17.22
111.267	88.7			351.14	19.25	175.55	20.18	277.64	17.31
111.358	80.7			351.41	19.18	175.7	20.19	277.86	16.18
111.358	95.7			351.69	18.09	175.78	19.97	278.09	15.95
111.38	61			351.96	18.8	175.94	19.19	278.32	16.11
111.471	76			352.24	17.6	176.1	18.97	278.54	17.93
111.471	86.3			352.51	16.95	176.26	19.15	278.54	18.16
111.493	50			352.78	16.73	176.34	19.25	278.77	18.03
111.584	70			353.06	17.91	176.5	19.61	279	16.55
111.584	74.7			353.33	19.67	176.66	18.64	279.23	16.44
111.606	57.3			353.61	20.41	176.81	18.37	279.45	16.59
111.697	76			353.88	21.54	177.29	17.46	279.68	18.09
111.697	80.3			354.16	21.78	177.45	17.31	279.91	15.71
111.719	67			354.44	22.34	177.52	17.55	280.02	15.28
111.81	65.7			354.71	20.21	177.68	17.67	280.47	14.63
111.81	79.3			354.99	20.79	177.84	15.92	280.7	16.06
111.832	71.7			355.26	20.7	177.92	15.87	280.93	13.57
111.923	71.3			355.54	22.83	178.08	15.92	281.15	12.77
111.923	72.7			355.82	21.77	178.23	17.69	281.38	12.67
111.946	73			356.09	21.77	178.39	17.83	281.61	14.68
112.036	68.7			356.37	20.15	178.47	17.75	281.83	13.41
112.036	77			356.65	20.96	178.63	17.67	282.06	13.73
112.059	75.3			356.93	19.84	178.79	17.6	282.29	14.38
112.149	71			357.2	21.14	178.94	17.98	282.52	14.76
112.149	74.7			357.55	18.31	179.02	18.73	282.74	14.65
112.172	96			357.83	19.46	179.18	18.87	282.97	13.46
112.262	62.3			358.11	18.33	179.34	18.86	283.2	14.9
112.262	68.3			358.39	19.71	179.41	18.79	283.42	15.06
112.285	65.7			358.52	18.42	179.57	18.97	283.65	16.08
112.375	64			359.08	18.28	179.73	18.91	283.88	16.72
112.375	72.7			359.36	18.08	179.89	19.16	284.1	16.81
112.398	47.3			359.64	17.56	179.96	19.2	284.33	15.81
112.488	57.3			359.92	17.29	180.12	19.53	284.56	15.37
112.488	70.3			360.2	17.4	180.28	19.89	284.78	14.68
112.511	30.3			360.48	17.63	180.36	20.38	285.01	14.66
112.601	52.7			360.76	18.45	180.51	20.64	285.24	13.7
112.601	72.3			361.04	19.16	180.67	20.39	285.47	14.02
112.624	37			361.32	20.06	180.82	20.6	285.69	15.31
112.714	72			361.6	21.16	180.9	21.57	285.92	16.72
112.737	34			361.88	23.22	181.06	21.52	286.15	17.82
112.827	58			362.16	26.66	181.22	22.64	286.37	17.89
112.85	37.3			362.44	28.95	181.29	22.52	286.6	17.25
112.94	66.7			362.72	27.09	181.45	23.9	286.83	16.03
112.963	5.72			363	23.88	181.61	23.84	287.06	15.56
112.963	19			363.28	19.95	181.68	23.9	287.28	16.73
113.054	64.3			363.56	19.5	181.84	23.75	287.51	17.4
113.076	28.04			363.85	18.7	182.31	22.65	287.74	17.74
113.167	49.7			364.13	19.08	182.46	20.91	287.97	17.94
113.189	38.36			364.41	19.06	182.54	20.27	288.19	18.07
113.28	61.7			364.69	18.81	182.7	20.29	288.42	17.92
113.302	52.08			364.97	19.43	182.85	21.14	288.54	17.14
113.393	67.7			365.54	20.15	182.93	21.26	288.99	16.53
113.415	60.4			365.82	21.25	183.08	21.45	289.22	15.64
113.506	62			366.1	22.25	183.24	22.09	289.45	14.58
113.528	71.12			366.24	22.67	183.32	22.37	289.67	14.86
113.619	65.3			383.73	18.03	183.47	22.98	289.9	14.68
113.641	77.44			384.02	19.53	183.55	22.51	290.13	15.01
113.732	63.3			384.3	20.48	183.71	21.68	290.36	14.39
113.755	77.45			384.59	21.6	183.86	19.49	290.59	14.13
113.845	60			384.87	19.48	183.94	18.35	290.82	13.92
113.868	83.17			385.15	26.2	184.09	17.84	291.04	14.09
113.958	61			386.01	32.88	184.25	18.56	291.27	15.43
113.981	75.89			386.29	41.66	184.33	18.95	291.5	16.43
114.071	65.7			386.57	40.65	184.48	18.24	291.73	15.95
114.094	64.21			386.86	39.21	184.63	18.25	291.96	15.77
114.184	65.3			387.42	35.31	184.71	17.54	292.19	14.38
114.207	72.24			387.71	34.91	184.87	18.51	292.41	13.37
114.297	15.72			387.99	36.03	185.02	18.28	292.64	12.74
114.297	35.3			388.27	39.36	185.1	19.7	292.87	13.63
114.32	77.57			388.56	40.1	185.25	19.74	293.1	14.52
114.41	53.74			388.77	39.72	185.33	20.74	293.33	14.7
114.433	74.6			389.05	39.49	185.48	21.03	293.56	14.33
114.523	52.36			389.33	39.84	185.64	21.39	293.79	14.88
114.546	51.03			389.61	38.51	185.71	21.22	294.02	14.85
114.636	53.78			389.9	35.99	185.87	20.79	294.25	13.22
114.659	45.07			390.18	28.85	186.02	21.38	294.48	13.7
114.75	48.79			390.46	25.04	186.1	22.27	294.71	13.56
114.772	47.1			390.74	20.19	186.25	20.63	294.94	16.12
114.863	40.41			391.02	20.29	186.33	21.2	295.17	16.91
114.885	52.13			391.3	17.92	186.48	21.71	295.4	18.34
114.976	37.13			391.87	17.01	186.64	24.06	295.63	19.26
114.998	51.46			392.15	17.71	187.02	23.28	295.86	18.76
115.089	35.15			392.3	17.86	187.18	21.91	296.09	19.34
115.111	47.79			392.48	18.94	187.25	22.34	296.32	18.14
115.202	33.87			392.61	17.8	187.41	22.73	296.55	20.91
115.224	46.82			392.79	17.97	187.56	22.06	296.78	21.96
115.315	32.18			392.97	17.31	187.63	21.48	297.01	25.02
115.337	44.55			393.15	16.81	187.79	22.4	297.12	24.95
115.428	35.2			393.33	16.71	187.86	21.69	297.58	26.67
115.45	44.29			393.51	17.26	188.02	22.44	297.81	26.82
115.541	33.24			393.69	17.66	188.17	22.07	298.05	27.91
115.564	44.32			393.87	17.86	188.25	24.86	298.28	27.72
115.654	36.26			394.04	18	188.4	24.37	298.51	28.31
115.677	45.36			394.22	17.82	188.48	23.89	298.74	27.17
115.767	32.99			394.4	18	188.63	21.8	298.97	26.32
115.79	44.99			394.58	17.83	188.7	20.86	299.2	25.81
115.88	33.32			394.75	17.97	188.86	20.52	299.43	26.65
115.903	44.02			394.89	17.93	189.01	23.36	299.67	26.14
115.993	33.66			395.06	17.89	189.09	24.8	299.9	24.94
116.016	45.46			395.24	16.35	189.24	24.95	300.13	23.39
116.106	34.39			395.42	16.14	189.31	22.87	300.36	24.1
116.129	44.79			395.6	16.6	189.47	22.44	300.59	22.64
116.219	35.72			395.77	18.66	189.54	22.26	300.83	23.04
116.242	44.53			395.95	19.07	189.7	22.33	301.06	21.74
116.332	33.15			396.13	18.93	189.85	22.04	301.29	24.11
116.355	15.68			396.3	18.59	189.92	22.29	301.52	24.56
116.355	26.86			396.48	18.19	190.08	23.66	301.76	24.97
116.445	34.48			396.66	17.85	190.15	23.49	301.99	24.33
116.468	43.66			396.79	17.45	190.3	22.42	302.22	24.91
116.559	32.81			396.97	17.28	190.38	21.25	302.46	25.08
116.581	44.94			397.15	16.72	190.53	22.34	302.69	22.46
116.672	6.32			397.33	16.52	190.61	22.63	302.92	19.58
116.672	34.24			397.5	16.59	190.76	23.68	303.16	19.94
116.694	44.92			397.68	16.29	190.83	23.73	303.39	22.44
116.785	20.34			397.86	16.59	190.99	25.22	303.63	24.35
116.785	33.58			398.04	16.2	191.14	24.29	303.86	24.22
116.807	45.2			398.13	16.54	191.52	23.14	304.09	33.52
116.898	25.76			398.48	16.27	191.59	22.03	304.33	30.26
116.898	31.61			398.62	16.43	191.74	21.44	304.33	29.03
116.92	44.89			398.8	16.52	191.82	21.34	304.56	20.35
117.011	28.78			398.98	16.25	191.97	21.3	304.8	22.56
117.011	33.65			399.16	15.66	192.12	22.1	305.03	23.06
117.033	45.17			399.34	15.48	192.19	22	305.27	21.09
117.124	28.1			399.52	15.62	192.35	21.5	305.5	22.64
117.124	34.69			399.7	14.43	192.42	20.45	306.33	24.47
117.146	45.55			399.88	14.57	192.57	18.53	306.56	26.49
117.237	28.11			400.06	15.02	192.65	18.47	306.8	26.37
117.237	32.72			400.2	14.98	192.8	19.38	307.04	25.38
117.26	45.83			400.38	15.03	192.87	20.57	307.27	25.19
117.35	28.43			400.56	15.18	193.02	20.91	307.51	24.56
117.35	29.76			400.75	16.94	193.1	19.52	307.75	25.16
117.373	45.51			400.93	17	193.25	20.75	307.98	25.94
117.463	27.85			401.12	16.89	193.32	21.15	308.22	27.08
117.463	33.79			401.3	16.97	193.47	21.87	308.46	23.48
117.486	44.79			401.49	16.98	193.55	18.99	308.69	22.73
117.576	27.87			401.67	16.82	193.7	16.29	308.93	22.02
117.576	36.13			401.81	16.77	193.77	16.47	309.17	26.09
117.599	44.46			402	16.48	193.92	18.94	309.41	25.97
117.689	9			402.18	16.71	194	21.71	309.65	27.3
117.689	15.86			402.37	16.82	194.15	20.5	309.88	25.98
117.689	27.19			402.56	17.31	194.22	21.4	310.12	26.08
117.712	44.73			402.75	17.15	194.37	20.5	310.36	24.54
117.802	27			402.94	17.28	194.45	22.26	310.6	24.9
117.802	29.21			403.13	16.91	194.6	21.02	310.84	24.65
117.825	45			403.27	16.8	194.67	21.01	311.08	25.36
117.915	27.54			403.46	16.47	194.75	21.28	311.32	23.99
117.915	27.7			403.66	16.48	194.9	22.27	311.56	23.55
117.938	44.68			403.85	16.35	194.97	22.6	311.8	23.77
118.028	26.27			404.04	16.65	195.12	23.64	312.04	27.55
118.028	38.3			404.24	14.7	195.2	23.95	312.28	30.76
118.051	44.93			404.43	14.61	195.35	23.6	312.52	34.68
118.141	24.99			404.58	14.2	195.72	21.77	312.76	33.02
118.141	31.3			404.77	15.71	195.79	20.3	313	37.51
118.164	43.9			404.87	15.97	195.94	20.22	313.24	39.36
118.254	29			405.27	16.85	196.02	20.11	313.48	45.45
118.254	30.02			405.46	18.23	196.16	20.06	313.72	46.13
118.277	44.26			405.66	18.66	196.24	18.13	313.96	47.6
118.368	20.3			405.86	18.51	196.39	18.22	314.2	48.3
118.368	27.66			406.01	18.29	196.46	18.17	314.44	49.42
118.39	43.23			406.22	18.01	196.61	20.63	314.69	49.73
118.481	22.3			406.42	17.79	196.69	20.87	322.29	19.86
118.481	24.09			406.62	17.07	196.76	21.74	322.54	18.94
118.503	43.2			406.83	17.26	196.91	21.38	322.78	17.89
118.594	18.7			407.03	16.95	196.98	20.65	323.03	15.32
118.594	22.12			407.24	17.44	197.13	19.94	323.28	14.9
118.616	43.46			407.39	15.63	197.2	19.65	323.53	14.21
118.707	16			407.6	15.79	197.35	19.05	323.78	15.82
118.707	30.75			407.81	15.43	197.43	19.73	324.03	15.9
118.729	43.13			408.02	16.9	202.13	21.06	324.28	16.16
118.82	20.7			408.23	16.29	202.2	23.97	324.53	15.86
118.82	24.48			408.44	16.34	202.34	23.91	324.78	15.55
118.842	42.1			408.6	16.11	202.42	21.39	325.03	15.5
118.933	26.52			408.81	17.27	202.49	19.76	325.28	15.71
118.933	28.7			409.03	15.76	202.63	19.32	325.54	15.69
118.955	43.06			409.24	16.36	202.71	21.89	325.79	14.9
119.046	16.85			409.46	16.59	202.78	22.28	326.04	14.44
119.046	33			409.68	16.84	202.93	22.55	326.29	13.66
119.069	43.33			409.84	16.47	203	21.85	326.54	12.66
119.159	18.28			410.06	15.58	203.07	21.84	326.8	12.95
119.159	36.3			410.28	16.67	203.22	21.8	327.05	14.05
119.182	44.3			410.5	16.31	203.29	22.36	327.3	15.72
119.272	16.31			410.72	15.68	203.36	21.72	327.55	16.09
119.272	36.7			410.94	15.09	203.51	21.81	327.81	16.41
119.295	44.96			411.11	14.55	203.58	21.23	328.06	17.23
119.385	14.35			411.34	14.05	203.65	21.2	328.31	17.37
119.385	42.7			411.56	14.11	203.79	19.47	328.57	17.07
119.408	44.93			411.79	14.52	203.87	19.75	328.82	16.77
119.498	22.39			412.02	14.96	203.94	20	329.08	17.68
119.498	30.7			412.25	15.2	204.08	22.08	329.33	19.24
119.521	44.2			413.01	15.14	204.16	21.88	329.59	20.59
119.611	17.7			413.24	15.22	204.23	21.79	329.84	20.47
119.611	24.72			413.48	15.48	204.3	20.97	330.1	19.65
119.634	43.46			413.65	15.68	204.45	21.55	330.35	18.41
119.724	26.7			413.89	15.54	204.52	19.03	330.61	18.6
119.724	28.06			414.13	15.71	204.59	19.28	330.86	17.87
119.747	15			414.37	15.85	204.73	19.32	331.12	18.85
119.747	27.13			414.61	16.32	204.81	22.2	331.76	17.94
119.837	29.09			414.8	16.77	204.88	24.19	332.02	19.14
119.837	44.7			415.04	16.87	205.02	23.98	332.28	18.26
119.86	43.3			415.28	16.88	205.09	24.31	332.54	18.56
119.938	34.83			415.53	17.03	205.17	22.73	332.79	18.09
119.938	60.3			415.78	17.62	205.24	22.58	333.05	18.32
119.958	45			416.03	19.16	205.38	22.08	333.31	15.72
120.036	5.32			416.22	19.35	205.67	22.27	333.57	15.51
120.036	19.16			416.47	19.04	205.81	22.78	333.83	13.3
120.036	62.3			416.72	17.7	205.88	23.57	334.09	15.44
120.056	44			416.97	16.36	205.96	23.97	334.34	14.9
120.134	17.74			417.23	15.95	206.03	24.59	334.6	16.66
120.134	64.7			417.42	15.44	206.17	23.88	334.86	16.75
120.154	42			417.68	15.95	206.24	24.22	335.12	14.61
120.232	18.06			417.94	15.5	206.31	24.12	335.38	13.78
120.232	66			418.2	15.65	206.39	24.89	335.64	13.06
120.252	41			418.39	15.45	206.53	24.44	335.91	14.92
120.33	38.08			418.66	15.33	206.6	23.95	336.17	15.53
120.33	69.3			418.92	15.11	206.67	24.02	336.43	15.65
120.35	33.7			419.19	15.21	206.74	24.45	336.69	15.92
120.428	52.1			419.45	15.36	206.89	25.49	336.95	15.42
120.428	67.3			419.65	15.46	206.96	25.8	337.21	15.06
120.448	34.7			419.92	28.8	207.03	26.16	337.47	13.11
120.526	57.41			420.19	29.38	207.17	25.59	337.74	12.97
120.526	60.3			420.19	29.71	207.24	25.27	338	13.08
120.546	33.3			420.47	14.22	207.32	25.01	338.26	14.29
120.624	60.83			420.74	14.08	207.39	24.23	338.52	14.23
120.624	81.3			420.95	14.7	207.53	24.08	338.79	14.19
120.644	34.7			421.22	17.11	207.6	22.94	339.05	14.2
120.722	62.45			421.5	17.32	207.67	23.21	339.31	13.76
120.722	80.3			421.64	16.66	207.74	22.89	339.58	12.34
120.742	36			422.13	16.19	207.81	23.51	339.84	12.39
120.82	64.17			422.41	15.8	207.96	23.97	340.11	12.59
120.82	83.3			422.7	15.72	208.03	23.87	340.37	13.53
120.84	35.7			422.98	15.62	208.1	24.1	340.64	13.75
120.918	36			423.2	15.84	208.17	23.04	340.9	16.21
120.918	55.7			423.48	14.26	208.31	22.79	341.57	18.11
120.918	57.49			423.77	15.28	208.38	22.54	341.83	18.56
120.938	36.7			424.06	15.45	208.46	22.81	342.1	17.03
121.016	73.21			424.36	15.9	208.53	23.24	342.36	16.68
121.016	94			424.58	15.75	208.67	21.87	342.63	15.75
121.036	35			424.87	16.66	208.74	20.37	342.9	14.38
121.114	76.24			425.17	18.87	209.02	19.21	343.16	13.94
121.114	104.7			425.47	18.29	209.09	19.28	343.43	14.02
121.133	34			425.69	17.08	209.24	19.49	343.7	15.01
121.212	80.27			425.99	16.66	209.31	18.82	343.97	14.29
121.212	103			426.3	16.22	209.38	18.56	344.23	14.22
121.231	33			426.6	16.76	209.45	18.77	344.5	12.65
121.31	89.3			426.83	16.56	209.52	19.32	344.77	12.48
121.31	105.3			427.13	16.84	209.66	18.88	345.04	12.43
121.329	31			427.44	15.84	209.73	18.37	345.31	14.28
121.408	98.02			427.75	15.55	209.8	17.74	345.58	14.55
121.408	104			427.99	15.94	209.87	18.56	345.85	14.87
121.427	30			428.3	16.39	209.94	19.58	346.12	12.9
121.506	97.67			428.61	16.48	210.08	20.7	346.39	11.75
121.506	103.7			428.93	16.36	210.15	21.48	346.66	11.61
121.525	30.7			429.17	16.41	210.23	22.26	346.93	12.5
121.604	99.7			429.48	16.73	210.3	22.48	347.2	14.47
121.604	106.7			429.8	16.7	210.37	22.58	347.47	14.63
121.623	30.3			430.13	16.84	210.51	19.45	347.74	13.52
121.702	102.73			430.37	16.57	210.58	18.83	348.01	13.67
121.702	109			430.69	14.69	210.65	17.97	348.28	14.11
121.721	28.7			431.02	14.9	210.72	19.81	348.55	16.37
121.8	103.76			431.26	14.62	210.79	20.26	348.82	16.13
121.8	107.7			431.59	15.73	210.86	20.66	349.09	15.88
121.819	29.3			431.92	15.62	211	21.55	349.37	16
121.898	107.49			432.26	16.56	211.07	21.66	349.64	16.3
121.898	109.7			440.54	18.67	211.14	18.97	349.91	15.72
121.917	27.3			440.91	19.77	211.21	19.6	350.18	16.45
121.996	107.22			441.28	20.29	211.28	19.74	350.46	16.5
121.996	114			441.57	20.18	211.42	23.49	350.73	17.6
122.015	28.7			441.94	19.61	211.49	23.19	351	16.93
122.093	108.25			442.32	19.2	211.56	23.88	351.14	16.25
122.093	116.7			442.7	16.41	211.63	23.32	351.69	16.66
122.113	28			442.99	15.1	211.7	22.44	351.96	16.39
122.191	106.88			443.76	12.82	211.77	20.82	352.24	16.52
122.191	116.3			444.05	14.99	211.91	20.44	352.51	15.86
122.211	29.7			444.44	16.19	212.19	19.85	352.78	16.07
122.289	112.32			444.83	18.92	212.26	17.04	353.06	16.9
122.289	117.3			445.12	19.01	212.33	16.57	353.33	16.32
122.309	29.7			445.51	19.35	212.4	17.18	353.61	16.11
122.387	116.65			445.91	18.8	212.47	19.96	353.88	16.49
122.387	120.7			446.21	18.98	212.54	19.3	354.16	17.46
122.407	28.3			446.6	19.6	212.61	19.51	354.44	17.78
122.485	118.39			447	18.38	212.75	19.32	354.71	17.12
122.485	121.3			447.3	19.13	212.82	18.76	354.99	16.01
122.505	29.7			447.71	20.15	212.89	17.41	355.26	15.73
122.583	118.42			448.11	22.35	212.96	17.1	355.82	15.24
122.583	123			448.42	20.84	213.03	17.57	356.09	16.01
122.603	28.7			448.82	20.38	213.1	17.71	356.37	15.95
122.681	118.46			449.23	17.68	213.17	18.04	356.65	15.46
122.681	119			449.54	19.55	213.31	18.03	356.93	15.5
122.701	9.3			449.95	19.04	213.38	17.98	357.2	16.14
122.779	118.49			450.36	21.15	213.45	17.91	357.48	16.77
122.779	118.7			450.68	20.21	213.52	18.6	357.76	17.73
122.799	28.7			451.09	18.72	213.59	19.47	358.04	18.48
122.877	115.13			451.51	19.06	213.66	19.6	358.32	19.16
122.877	117.7			451.82	19.79	213.73	19.12	358.59	19.79
122.897	30.7			452.25	20.49	213.87	18.69	358.87	20.07
122.975	35.02			452.67	20.38	213.94	18.87	359.15	20.74
122.975	71.86			452.99	20.54	214.01	18.97	359.43	20.18
122.975	115			453.41	19.78	214.08	19.07	359.71	19.94
122.995	31.7			453.73	19.72	214.15	18.71	359.99	17.97
123.073	108.04			454.16	18.83	214.22	19.31	360.27	18.6
123.073	114.3			454.59	19.41	214.28	19.5	360.55	17.86
123.093	31.7			454.92	18.63	214.35	20.23	360.83	21.71
123.171	113.06			455.35	19.91	214.42	19.87	362.09	23.44
123.171	116.7			455.78	20.75	214.56	19.89	362.37	25.59
123.191	31			456.11	22.3	214.63	20.3	362.65	26.1
123.269	113.08			456.55	21.05	214.7	21.08	362.93	26.17
123.269	113.7			456.99	23.19	214.77	20.98	363.21	27.04
123.289	30			457.1	23.8	214.84	22.59	363.49	27.28
123.367	111.8			457.99	25.59	215.12	24.2	363.77	25.48
123.367	116			458.32	25.48	215.19	26.69	364.06	23.69
123.387	27			458.77	28.02	222.95	29.41	364.34	24.01
123.465	108.7			459.21	30.41	222.95	28.19	364.62	26.79
123.465	110.41			459.55	28.63	223.01	25.44	364.9	28.61
123.484	29.3			460	28.13	223.08	25.53	365.18	29.08
123.563	103.7			460.34	27.01	223.15	27.29	365.47	29.99
123.563	106.43			460.8	27.4	223.21	28.77	365.75	31.89
123.582	32			461.25	25.63	223.28	28.16	366.03	32.66
123.661	98.15			461.59	24.06	223.35	27.59	366.31	32.69
123.661	99.3			462.05	22.42	223.41	27.89	366.6	32.38
123.68	32			462.4	21.48	223.48	28.43	366.88	33.49
123.858	90.3			462.86	19.06	223.55	27.82	367.16	34.14
123.858	93.47			463.32	20.55	223.62	26.92	367.44	34.64
123.911	44			463.67	20.75	223.68	27.48	367.73	32.57
124.121	26			464.14	21.12	223.75	27.78	368.01	31.32
124.121	62			464.6	20.83	223.82	25.44	368.29	30.37
124.121	91.89			464.95	20.64	223.82	25.41	368.58	31.09
124.174	104.7			465.43	21.59	223.88	25.75	368.86	32.54
124.385	93.21			465.78	22.15	223.95	29.51	369.14	34.24
124.385	93.7			466.25	22.16	224.02	29.45	369.43	35.64
124.437	113			466.73	22.85	224.08	27.89	369.71	34.64
124.648	93.54			467.08	23.43	224.15	25.82	369.99	34.58
124.648	97.3			467.56	24.24	224.22	25.81	370.28	30.63
124.701	116.3			467.56	24.5	224.28	25.96	370.56	31.3
124.911	90.97			467.92	23.96	224.35	26.62	370.85	31.26
124.911	94			468.4	23.16	224.42	28.03	371.13	34.72
124.964	117			468.76	21.47	224.48	28.36	371.41	34.53
125.175	90			469.25	21.28	224.48	30.5	371.7	33.95
125.175	93			469.73	20.51	224.55	28.6	371.98	33.72
125.227	116.3			470.1	21.07	224.62	29.96	372.12	43.26
125.438	96.32			470.59	19.41	224.68	27.01	372.69	44.08
125.438	104.7			470.95	19.13	224.81	25.92	372.69	44.43
125.491	116.3			471.44	20.36	224.88	24.52	372.98	34.94
125.701	101.37			471.94	21.09	224.95	24.28	373.26	35.07
125.701	104.3			472.31	22.1	225.01	24.9	373.55	35.02
125.754	116			472.8	20.63	225.08	25.37	373.83	34.53
125.965	99.7			473.05	21.95	225.21	28.45	374.12	32.32
125.965	108			473.92	21.04	225.28	28.8	374.4	31.96
126.017	116			474.3	21.07	225.35	29.34	374.69	32.39
127.041	99.73			474.8	20.15	225.35	27.51	374.97	33.97
127.041	108			475.17	20.82	225.41	27.59	375.26	33.57
127.365	114.7			475.68	21.46	225.48	27	375.54	33.74
128.66	105.46			476.18	19.49	225.54	28.16	375.83	33.26
128.66	114			476.56	19.61	225.61	27.65	376.11	35.28
128.983	114			477.07	19.67	225.68	26.49	376.4	35.6
130.278	118.79			477.45	19.86	225.74	26.97	376.68	36.31
130.278	122			477.97	19.75	225.81	29.67	376.97	32.63
130.602	116.7			478.35	17.59	225.88	30.05	377.25	35.41
131.897	117.22			478.86	19.72	225.88	28.59	377.54	37.08
131.897	119.3			479.25	19.55	226.6	26.15	377.82	41.86
132.22	115.7			479.77	21.62	226.67	27.02	378.11	41.8
133.515	95.85			480.28	21.77	226.73	25.59	378.39	43
133.515	101.7			480.67	22.71	226.73	25.03	378.68	39.58
133.839	116.7			481.19	23.18	226.8	22.88	378.96	40.95
135.009	82.88			481.59	22.5	226.87	21.99	379.25	43.21
135.009	85.3			482.11	21.13	226.93	19.98	379.53	49.14
135.208	116.3			482.5	22.03	227	17.39	379.82	50.02
136.005	83.62			483.03	24.52	227.06	16.93	380.1	45.26
136.005	88			483.42	25.63	227.2	17.24	387.49	41.8
136.204	117.3			483.95	24.98	227.26	19.31	387.78	36.94
137	88.65			484.35	23.59	227.26	18.93	388.06	37.43
137	92			484.88	22.15	227.33	18.45	388.34	35.97
137.199	118.7			485.28	20.56	227.39	18	388.63	36.38
137.996	104.39			485.81	21.31	227.46	18.08	388.91	34.29
137.996	109.7			486.22	24.09	227.52	18.15	389.19	31.59
138.195	118.3			486.75	24.3	227.59	18.14	389.47	27.43
138.991	111			487.29	22.19	227.59	17.42	389.76	27.03
138.991	112.72			487.69	22.49	227.66	17.2	390.04	25.82
139.19	116			488.23	25.1	227.72	16.65	390.32	25.36
139.987	111.7			488.64	27.21	227.79	16.77	390.6	24.9
139.987	112.76			489.18	25.51	227.85	16.75	390.88	26.13
140.186	39.05			489.59	24.2	227.85	16.66	391.16	28.6
140.186	53.3			491.23	22.99	227.92	16.65	391.44	28.35
140.982	121.3			491.78	23.09	227.98	16.64	391.73	29.09
140.982	145.09			492.19	22.96	227.98	16.15	392.01	29.07
141.181	115.08			492.74	23.18	228.05	16.45	392.21	29.34
141.978	150.83			493.16	22.31	228.12	16.65	392.39	28.89
141.978	175			493.71	21.68	228.18	17.71	392.57	27.45
142.177	118.11			494.13	20.31	228.25	18.4	392.75	26.15
142.973	51.3			494.69	20.75	228.31	18.73	392.93	25.09
142.973	75.86			495.11	20.8	228.31	19.08	393.11	25.73
142.973	151			495.66	21.03	228.38	19.35	393.28	27.1
143.173	119.14			496.08	20.14	228.44	19.95	393.46	27.93
143.969	135.3			496.65	19.52	228.51	19.97	393.64	25.59
143.969	141.7			497.07	18.9	228.57	17.91	393.82	24.26
144.168	120.17			497.63	19.03	228.64	17.35	394	23.53
144.964	115.7			498.06	19.11	228.64	17.78	394.18	24.84
144.964	126.7			498.62	19.33	228.71	19.64	394.35	26.49
145.164	120.2			499.05	18.9	228.77	20.35	394.53	28.95
145.96	102.7			499.62	16.8	228.84	20.46	394.71	31.16
145.96	108.3			500.04	17.18	228.9	20.92	394.89	29.49
146.159	120.53			500.61	17.88	228.9	20.91	395.06	27.12
146.956	97.7			501.04	20.14	228.97	20.22	395.24	28.77
146.956	104			501.62	20.36	229.03	19.57	395.68	32.21
147.155	121.26			502.05	20.19	229.23	19.41	395.86	33.8
147.951	90			502.62	19.67	229.29	20.16	396.04	33.75
147.951	97			503.05	19.94	229.36	20.22	396.22	30.92
148.15	121.98			503.63	19.8	229.36	20.22	396.39	31.34
148.947	84			504.06	20.4	229.42	20.21	396.57	32.03
148.947	86			504.64	19.41	229.49	20.49	396.75	34.96
149.146	121.61			505.08	18.9	229.55	20.9	396.93	34.92
149.942	95			505.52	18.16	229.62	18.76	397.1	33.03
149.942	95.3			506.1	18.24	229.62	16.09	397.28	31.71
150.141	121.65			506.54	18.64	229.68	15.21	397.46	30.44
150.938	104			507.12	18.49	229.75	17.31	397.64	30.5
150.938	104.3			507.56	18.65	229.81	19.73	397.81	30.01
151.137	122.39			508.15	17.9	229.88	19.36	397.99	33.18
151.933	26.3			508.59	17.89	229.88	19.19	398.17	31.6
151.933	83			508.88	18.54	229.94	18.87	398.35	33.23
151.933	109			509.92	19.54	230.01	19.54	398.53	30.85
152.132	122.74			510.36	20.53	230.07	19.24	398.71	33.34
152.929	107.7			510.95	20.87	230.14	19.77	398.89	32.71
152.929	114			511.4	20.9	230.14	19.94	399.07	34.12
153.128	122.48			511.99	20.5	230.2	20.18	399.25	33.7
153.924	116.7			512.44	20.36	230.27	19.7	399.79	33.38
153.924	118.7			512.89	20.5	230.33	18.57	399.97	34.67
154.123	121.83			513.48	18.65	230.4	17.14	400.15	34.72
154.92	116			513.93	18.09	230.4	16.41	400.34	37.24
154.92	119			514.53	18.31	230.46	16.48	400.52	37.21
155.119	122.59			514.98	21.29	230.53	16.99	400.7	40.22
155.915	115			515.58	21.89	230.59	17.24	400.89	40.83
155.915	115			516.04	19.74	230.66	17.09	401.07	41.99
156.115	121.94			516.49	18.9	230.66	17.07	401.25	42.19
156.911	133.7			517.09	19.31	230.72	16.73	401.44	41.67
156.911	134.7			517.55	21.6	230.79	17.06	401.62	41.15
157.11	121.69			518.15	21.81	230.85	15.88	401.81	36.33
157.907	131			518.61	21.87	230.92	18.65	402.47	34.96
157.907	134.3			519.22	21.03	231.18	17.71	402.65	32.65
158.106	118.74			519.67	21.37	231.24	21.16	402.84	34.45
158.902	131.7			520.13	20.5	231.24	19.94	403.03	35.45
158.902	143			520.74	21.62	231.31	19.91	403.22	36.68
159.101	77.49			521.2	21.22	231.37	19.7	403.42	34.07
159.898	130			521.81	21.34	231.44	20.49	403.61	34.13
159.898	135.7			522.27	20.34	231.5	22.9	403.8	35.42
160.893	143.7			522.73	20.49	231.5	21.99	403.99	38.19
160.893	146			523.35	20.48	231.57	21.13	404.19	33.79
161.889	159			523.81	18.66	231.63	20.7	404.38	31.94
161.889	161.7			524.42	17.66	231.7	20.85	404.58	33.4
162.884	138.3			524.89	17.09	231.7	18.83	404.77	36.19
162.884	154.7			525.35	19.24	231.76	19.17	404.97	37.58
163.88	129			525.97	20.22	231.82	19.11	405.17	37.81
163.88	146.7			526.43	19.04	231.89	21.44	405.36	38.94
164.875	136			527.06	18.93	231.95	21.68	405.56	38.03
164.875	142.7			527.52	16.4	231.95	21.68	405.76	39.6
165.871	99.3			527.99	17.27	232.02	21.52	405.96	38.18
165.871	120			528.3	16.35	232.08	21.2	406.17	38.02
166.866	119.7			529.39	18.81	232.15	20.99	406.37	37.28
167.862	121			529.86	18.64	232.15	21.34	406.57	39.84
168.857	97.7			530.49	19.14	232.21	21.51	406.78	37.59
169.853	101			530.96	18.02	232.28	22.07	406.98	35.54
170.849	241.3			531.43	19.42	232.34	21.83	407.19	33.62
171.844	182			532.05	19.16	232.34	21.64	407.39	38.6
172.84	57.02			532.52	19.93	232.4	22.02	407.6	41.51
172.84	112.7			533	18.14	232.47	22.41	407.81	42.91
173.835	148.34			533.63	18.15	232.53	22.91	408.02	40.46
174.831	133.36			534.1	16.67	232.53	22.56	408.23	38.02
175.826	128.38			534.57	16.22	232.6	22.41	408.44	37.98
176.822	131.1			535.21	15.29	232.66	22.76	408.65	38.23
177.817	144.41			535.68	15.64	232.73	23.09	408.87	37.33
178.813	136.83			536.16	16.53	232.79	23.57	409.08	38.03
179.808	137.85			536.79	16.72	232.79	23.18	409.3	37.74
180.804	159.87			537.27	17.11	232.86	22.39	410.06	39.14
181.799	177.89			537.9	17.55	233.05	19.61	410.28	38.77
182.795	202.51			538.38	16.38	233.05	16.28	410.5	38.35
183.791	201.94			538.86	16.37	233.11	15.36	410.72	35.91
184.786	193.27			539.49	16.17	233.18	17.84	410.94	33.37
185.782	178.59			539.97	18.76	233.24	22.38	411.17	31.05
186.777	167.32			540.45	19.76	233.24	25.4	411.39	29.07
187.773	189.67			541.09	18.64	233.31	26.28	411.62	30.57
188.498	187.4			541.57	18.97	233.37	24.94	411.85	31.56
188.817	202.43			542.05	17.61	233.43	23.27	412.08	35.51
189.135	166.16			542.69	19.4	233.43	22.72	412.31	34.39
189.454	144.79			543.17	19.75	233.5	23.3	412.54	34.35
189.773	128.52			543.65	20.04	233.56	24.11	412.77	30.19
190.092	163.25			544.3	20.19	233.63	24.03	413.01	26
190.411	158.58			573.28	20.29	233.63	25.15	413.24	23.61
190.539	41			573.78	20.02	233.69	26.41	413.48	22.86
190.73	157.31			574.28	17.9	233.75	26.92	413.71	20.9
190.858	125.7			574.94	16.95	233.82	26.99	413.95	18.32
191.049	145.35			575.44	18.5	233.82	23.75	414.19	21.37
191.177	129			575.94	21.82	233.88	24.28	414.43	26.06
191.368	158.99			576.44	23.78	233.95	23.91	414.67	28.91
191.496	145.3			576.94	24.15	234.01	26.69	414.92	27.59
191.687	150.02			577.6	23.93	234.01	26.41	415.16	26.16
191.815	151.3			578.1	24.65	234.07	25.55	415.41	25.41
192.006	161.76			578.6	24.08	234.14	24.92	415.65	24.05
192.134	135			579.1	21.6	234.2	25.07	415.9	23.12
192.325	138.79			579.59	19.25	234.2	25.87	416.15	23.51
192.453	132.3			580.26	19.24	234.27	26.31	416.4	23.33
192.644	136.83			580.76	19.94	234.33	26.52	416.66	23.84
192.772	113.3			581.26	19.36	234.39	26.87	416.91	24.85
192.963	54.02			581.76	17.82	234.39	27.72	417.16	25.18
192.963	78.56			582.26	19.01	234.46	26.97	417.42	25.69
193.09	111.7			582.76	18.33	234.52	26.52	417.68	24.48
193.282	116.74			583.42	20.25	234.52	25.7	417.94	24.85
193.409	93.7			584.59	21.37	234.59	25.61	418.2	26.36
193.601	88.36			585.09	24.37	234.65	26.05	419.12	29
193.728	45			585.58	26.12	234.78	25.7	419.39	33.8
193.92	54.38			586.08	26.08	234.78	25.54	419.65	37.34
194.047	65			586.58	24.61	234.84	24.93	419.92	38.15
194.239	84.8			587.25	22.18	234.9	22.77	420.19	37.07
194.366	77.3			587.75	20.84	234.9	23.46	423.27	34.28
194.558	95.12			588.25	20.84	234.97	22.15	423.56	33.39
194.685	95			588.75	21.55	235.03	24.51	423.85	29.47
194.877	103.13			589.25	21.45	235.1	24.09	424.14	25.5
195.004	110.3			589.75	18.68	235.1	23.97	424.43	24.91
195.196	118.85			590.41	18.66	236.87	22.67	424.73	26
195.323	108			590.91	18.09	236.94	25.53	425.02	28.61
195.515	113.87			591.41	19.64	236.94	29.32	425.06	27.72
195.642	118.3			591.91	18.85	237	31.91	425.3	25.98
195.833	121.19			592.41	18.89	237.06	31.85	425.53	23.81
195.961	117.3			592.91	19.05	237.06	30.36	425.77	23.18
196.152	122.91			593.41	16.83	237.13	30.43	426	20.61
196.28	135			594.07	16.8	237.19	29.22	426.24	20.27
196.471	148.54			594.57	17.72	237.25	28.84	426.47	19
196.599	141.7			595.07	19.73	237.25	25.78	426.7	19.32
196.79	149.27			595.57	20.17	237.32	26.05	426.94	17.67
196.918	132.7			596.07	19.73	237.38	25.98	427.17	15.41
196.982	28.02			596.57	21.16	237.38	28.99	427.41	14.92
197.109	131.99			597.07	22.78	237.44	29.21	427.64	16.86
197.237	107.3			597.56	23.74	237.5	29.48	427.87	16.42
197.301	109.34			598.06	23.3	237.5	29.28	428.11	15.98
197.428	107.62			598.73	21.4	237.57	29.37	428.23	16.78
197.556	103			599.23	20.42	237.63	30.91	447.66	15.25
197.62	87.36			599.72	20.12	237.69	31.86	447.9	15.16
197.747	107.37			600.22	20.11	237.69	32.23	448.13	13.9
197.875	106.7			600.72	20.84	237.76	32.91	448.36	14.85
197.939	84.78			601.22	22.09	237.82	33.31	448.6	14.83
198.066	109.4			601.71	22.34	237.82	32.18	448.83	15.33
198.194	108.7			602.21	21.56	237.88	30.47	449.07	14.96
198.257	97.8			602.71	19.39	237.95	30.28	449.3	14.21
198.385	128.13			603.04	19.53	237.95	31.37	449.53	13.72
198.513	90.3			604.04	19.65	238.01	28.92	449.77	13.69
198.576	101.11			604.53	20.94	238.07	27.9	450	12.3
198.704	152.46			605.03	21.43	238.13	26.5	450.24	12.15
198.832	129.7			605.53	22.22	238.13	29.18	450.47	11.88
198.895	63.13			606.02	21.66	238.2	28.57	450.71	13.31
199.023	155.79			606.68	20.74	238.26	29.69	450.94	12.7
199.151	150.7			607.18	19.89	238.26	31.34	451.17	12.74
199.214	45.45			607.68	19.76	238.32	33.92	451.41	12.56
199.342	165.22			608.17	18.77	238.39	35.39	451.64	12.88
199.47	164			608.67	20.95	238.39	36.97	451.88	12.71
199.533	43.47			609.16	22.61	238.45	32.14	452.11	12.95
199.661	181.25			609.66	25.92	238.51	27.78	452.34	13.16
199.788	113			610.15	24.94	238.57	25.64	452.58	13.77
199.852	38.19			610.65	22.4	238.64	26.76	453.05	13.89
199.98	196.58			611.14	21.97	238.64	30.9	453.28	15.01
200.107	64.02			611.63	22.23	238.7	32.77	453.52	15.4
200.171	114.21			612.13	25.06	238.76	38.07	453.75	16.78
200.299	205.92			612.62	25.41	238.76	40.11	453.98	15.77
200.426	194.04			613.12	25.22	238.83	37.29	454.22	16.15
200.49	123.24			613.61	24.68	238.89	37.61	454.45	15.75
200.618	208.95			614.1	23.47	238.95	38.26	454.45	16.31
200.745	212.76			614.76	22.62	238.95	42.07	454.69	15.06
200.809	100.57			615.25	21.42	239.01	41.13	454.92	14.22
200.937	219.69			615.74	21.91	239.08	38.33	455.15	14.73
201.064	220.08			616.24	20.33	239.08	35.2	455.39	15.39
201.128	102.59			616.73	22.19	239.14	32.62	455.62	15.21
201.256	227.72			617.22	23.51	239.2	30.54	455.86	13.88
201.383	222.1			617.71	26.42	239.2	27.99	456.09	13.33
201.447	117.32			618.2	25.17	239.27	25.44	456.33	13.33
201.575	223.46			618.69	24.83	239.33	23.06	456.56	13.98
201.702	207.11			619.18	24.48	239.33	22.63	456.79	14.54
201.766	138.66			619.67	26.08	239.39	21.79	457.03	14.06
201.894	212.09			620.16	25.33	239.45	21.24	457.26	14.61
202.021	201.43			620.65	23.55	239.52	20.52	457.5	12.97
202.085	147.39			621.14	22.81	239.52	20.83	457.73	13.8
202.213	204.53			621.63	20.78	239.58	20.45	457.96	13.46
202.34	194.45			621.79	20.98	239.64	20.29	458.2	15.24
202.404	161.12			622.77	20.1	239.64	19.76	458.43	15
202.531	66			623.26	20.65	239.7	19.61	458.67	13.56
202.531	119.16			623.75	20.25	239.77	19.45	458.9	13.86
202.659	179.47			624.23	18.94	239.77	19.38	459.14	14.68
202.723	185.16			624.72	17.6	239.83	19.98	459.37	16.41
202.85	175.3			625.21	17.84	239.89	20.05	459.6	16.76
202.978	153.19			625.69	17.43	239.95	19.63	459.84	16.82
203.042	198.79			626.18	18.13	239.95	18.97	460.07	16.97
203.169	172.3			626.66	19.25	240.02	18.23	460.31	16.88
203.297	175.21			627.15	20.15	240.08	19.7	460.54	17
203.361	208.22			627.63	20.35	240.14	21.62	460.77	16.97
203.488	189			628.12	18.73	240.2	23.37	461.01	15.15
203.616	184.24			628.6	18.44	240.27	24.15	461.24	14.75
203.68	232.55			629.09	19.08	240.27	24.09	461.83	15.99
203.807	198.7			629.57	19.36	240.33	24.15	462.06	18.39
203.935	200.96			630.05	19.23	240.39	23.35	462.3	18.99
203.999	235.58			630.54	19.31	240.39	22.98	462.53	18.28
204.126	208			631.02	19.93	240.45	22.25	462.76	17.88
204.23	210.99			631.5	20.53	240.52	21.24	463	16.06
204.27	223.32			631.98	20	240.58	20.38	463.23	16.2
204.349	223.7			632.46	19.14	240.58	20.04	463.47	16.45
204.429	208.02			632.94	19.42	240.64	20.25	463.7	18.13
204.469	219.95			633.42	19.33	240.7	20.68	463.94	17.69
204.549	216.7			633.9	18.58	240.7	20.68	464.17	17.41
204.628	209.66			634.38	18.3	240.76	20.68	464.4	17.32
204.668	202.69			634.86	18.26	240.83	20.4	464.64	17.42
204.748	208			635.34	19.52	240.83	20.31	464.87	17.03
204.827	204.39			635.82	19.27	240.83	19.99	465.11	17.42
204.867	169.02			636.3	18.47	240.89	19.9	465.34	16.73
204.947	214			636.78	18.66	240.95	19.81	465.57	16.35
205.027	204.72			637.09	18.68	241.01	19.67	465.81	14.11
205.067	160.06			637.57	19.87	241.01	19.15	466.04	12.57
205.146	201.7			638.05	20.19	241.08	18.86	466.28	12.1
205.226	189.75			638.52	20.59	241.14	19.01	466.98	10.91
205.266	179.49			639	22.58	241.14	19.16	467.21	11.4
205.345	193			640.58	23.93	241.2	19.46	467.45	10.82
205.425	187.18			641.05	22.57	241.26	19.55	467.68	12.59
205.465	194.83			641.53	23.01	241.26	20.03	467.92	12.57
205.545	187.7			642	22.32	241.32	20.68	468.15	13.12
205.624	182.52			642.47	24.55	241.39	20.68	468.38	13.4
205.664	66			642.94	22.22	241.39	20.55	468.62	13.17
205.664	160.86			643.41	22.78	241.45	19.6	468.85	12.14
205.744	177			643.88	21.47	241.51	19.54	469.09	11.48
205.824	174.55			644.35	21.79	241.57	19.2	469.32	11.48
205.863	212.7			644.82	21.26	241.57	19.79	469.56	11.44
205.943	123			645.13	22.52	241.63	20.21	469.79	11.63
206.023	164.28			645.6	23.01	241.7	20.3	470.02	12.26
206.063	199.3			646.07	23.27	241.7	20.14	470.14	13.76
206.222	160.61			673.25	22.25	241.76	19.77	470.61	14.1
206.262	195			673.68	21.74	241.82	19.72	470.84	14.33
206.421	158.95			674.11	21.04	241.88	19.4	471.08	13.8
206.461	205			674.4	18.84	241.88	19.41	471.31	13.96
206.62	148.99			674.83	18.91	241.94	17.46	471.55	14.09
206.66	188.3			675.26	19.27	242.01	18.23	471.78	13.84
206.82	142.02			675.68	21.25	242.07	19.22	472.01	13.77
206.859	185			675.97	19.25	242.07	22.62	472.25	13.79
207.019	140.76			676.39	17.32	242.13	23.79	472.48	14.43
207.059	180.7			676.82	15.07	242.19	24.16	472.72	15.21
207.218	137.79			677.1	15.21	242.19	24.47	472.95	16.48
207.258	172.3			677.53	16.28	242.25	24.35	473.18	15.27
207.417	130.83			677.95	17.18	242.32	24.23	473.42	14.99
207.457	161			678.37	17.55	242.32	24.23	473.65	14.29
207.617	41.02			678.66	17.32	242.38	24.27	473.89	16.29
207.617	70.56			679.08	16.72	242.44	24.74	474.12	15.67
207.656	157.7			679.5	17.04	242.5	24.83	474.36	15.18
207.816	119.74			679.78	17.18	242.5	24.66	474.59	14.47
207.856	147			680.2	16.97	242.56	23.99	474.82	15.29
208.015	121.76			680.62	17.06	242.63	23.5	475.06	14.16
208.055	138.7			680.9	17.16	242.63	23.04	475.29	14.6
208.214	118.78			681.31	17.82	242.69	22.95	475.53	15.31
208.254	135			681.73	18.11	242.75	23.22	475.76	17.05
208.413	111.39			682.01	18.61	242.75	22.84	475.99	16.99
208.453	144			682.42	18.76	242.81	22.4	476.23	16.04
208.613	101.11			682.84	18.61	242.87	21.37	476.46	15.5
208.652	140.3			683.12	18.4	242.94	18.81	476.7	16.27
208.812	100.43			683.53	18.19	242.94	18.05	476.93	18.02
208.852	133.7			683.94	16.43	243	17.92	477.17	19.93
209.011	96.45			684.22	16.55	243.06	20.23	477.4	20.71
209.051	127.3			684.63	16.46	243.06	21.07	477.63	21.04
209.21	95.87			685.04	17.88	243.12	21.67	477.87	21.63
209.25	121.3			685.31	17.39	243.18	22.76	478.1	21.83
209.409	104.89			685.72	17.35	243.18	22.46	478.34	23.36
209.449	113.3			686	16.49	243.24	21.66	479.39	24.47
209.609	101.5			686.4	17.01	243.43	20.3	479.62	25.82
209.649	100.3			687.35	16.93	243.43	20.14	479.86	25.54
209.808	105.24			687.63	18.43	243.49	17.94	480.09	25.34
209.848	99			688.03	17.98	243.55	17.78	480.33	24.12
210.007	102.56			688.44	39.08	243.55	17.12	480.56	23.56
210.047	103			688.7	38.51	243.61	18.95	480.8	23.35
210.206	92.59			688.7	38.72	243.68	18.97	481.03	24.04
210.246	106			689.11	18.26	243.74	19.2	481.26	24.71
210.406	80.62			689.38	19.23	243.74	19.76	481.5	25.16
210.445	103.7			689.78	19.5	243.8	20.28	481.73	25.63
210.605	91.36			690.18	19.4	243.86	20.92	481.97	25.9
210.645	109			690.45	19.19	243.86	20.97	482.2	25.4
210.804	90.69			690.85	18.26	243.92	20.3	482.43	25.27
210.844	26			691.11	17.4	243.98	19.61	482.67	24.62
210.844	106			691.51	17.05	243.98	18.7	482.9	25.22
211.003	96.42			691.91	17.44	244.04	17.82	483.14	25.51
211.043	96.3			692.17	18.3	244.11	17.41	483.37	24.77
211.043	99.3			692.57	19.04	244.17	17.1	483.61	23.15
211.202	100.15			692.83	19.26	244.17	15.59	483.84	22.96
211.242	90			693.23	19.43	244.23	15.47	484.07	23.39
211.242	93.3			693.49	18.37	244.29	15.38	484.31	24.24
211.402	103.18			693.49	15.8	244.29	16.87	484.54	23.01
211.441	90.7			694.02	17.6	244.35	17.06	484.78	22.26
211.441	96.7			694.67	16.82	244.41	17.35	485.01	21.22
211.601	109.51			695.19	15.78	244.47	17.61	485.24	20.92
211.641	28.7			695.71	13.09	244.47	16.77	485.48	21.16
211.641	59.7			696.23	13.39	244.54	16.1	485.71	21.07
211.641	102			696.62	13.93	244.6	15.99	485.95	18.66
211.8	109.54			697.14	15.76	244.6	16.35	486.18	18.38
211.84	93			697.65	15.63	244.66	16.47	486.42	18.69
211.84	109			698.16	15.65	244.72	16.43	486.65	21.17
211.999	103.28			698.68	15.9	244.78	16.29	486.88	20.44
212.039	97			699.19	15.98	244.78	14.67	487.12	20.47
212.039	104.7			699.57	16.3	244.84	14.7	487.35	18.26
212.198	102.61			700.08	16.74	244.9	15.01	487.59	19.02
212.238	105.3			700.58	17.61	244.9	16.95	487.7	19.38
212.238	105.3			700.71	15.53	244.97	17.85	488.17	22.87
212.398	107.95			701.72	13.32	245.03	18.83	488.41	24.52
212.438	103			702.09	12.23	245.09	19.64	488.64	27.58
212.438	105.3			702.59	14.28	245.15	19.47	488.87	28.32
212.597	109.98			702.97	16.2	245.15	17.18	489.11	26.95
212.637	108.3			703.34	16.12	245.21	17.19	489.34	24.79
212.637	110.7			703.84	15.72	245.27	17.17	489.58	24.48
212.796	121.42			704.21	15.57	245.33	19.6	490	30.77
212.836	108.7			704.71	14.25	245.33	19.69	490.51	28.05
212.836	120			705.08	14.05	245.39	20.02	538.72	14.97
212.995	123.46			705.44	13.88	245.46	18.19	539.77	15.28
213.035	106			705.81	15.68	245.46	18.98	540.82	13.53
213.035	123.7			706.3	16.14	245.52	19.07	541.87	13.78
213.195	121.49			706.67	16.47	245.58	21.04	542.92	13.71
213.234	105.3			707.03	16.55	245.64	20.15	543.96	15.15
213.234	123.7			707.4	16.77	245.64	19.67	545.01	14.86
213.394	121.83			707.76	17.26	245.7	18.75	546.06	15.19
213.434	120.7			708.13	17.84	245.76	18.79	547.11	13.78
213.434	130			708.49	17.87	245.76	19.32	548.16	15.7
213.593	36.02			708.85	17.89	245.82	19.92	549.2	14.99
213.593	75.86			709.21	18.36	245.88	20.08	550.25	17.72
213.633	123.7			709.57	18.95	245.94	19.84	551.3	18.1
213.633	128			709.93	19.98	245.94	19.79	552.35	18.82
213.792	116.74			710.29	19.93	246.01	20.25	553.4	20.02
213.832	116.7			710.64	20.5	246.07	19.84	554.45	20.31
213.832	125			711	20.37	246.13	19.62	555.49	21.89
213.991	118.06			711.24	20.95	246.13	19.5	556.54	21.99
214.031	124.7			711.59	21.14	246.19	19.76	557.59	22.69
214.031	126			711.95	21.59	246.25	19.81	558.64	24.06
214.191	127.78			712.3	19.59	246.31	19.74	559.69	25.53
214.231	124.3			712.53	18.66	246.31	19.33	560.21	26.65
214.231	131.7			712.89	18.61	246.37	19.07	562.31	27.13
214.39	129.1			713.12	20.59	246.43	19.14	563.36	27.08
214.43	118			713.47	21.43	246.43	19.36	564.4	28.75
214.43	130			713.82	19.51	246.49	18.31	565.45	29.01
214.589	134.11			714.05	19.4	246.55	16.63	566.5	29.11
214.629	128.7			714.4	19.55	246.62	15.54	567.55	26.53
214.629	144.7			714.52	21.17	247.41	22.11	568.6	26.9
214.788	149.13			715.1	18.67	247.47	22.09	569.64	27.86
214.828	129			715.33	17.85	247.53	21.83	570.69	29.49
214.828	151.3			715.67	17.31	247.59	21.99	571.74	29.33
214.988	141.45			715.9	19.59	247.59	22.14	572.79	30.08
215.027	133.7			716.13	20.54	247.65	22.56	573.84	30.99
215.027	140.3			716.48	21.2	247.71	22.98	574.89	32.03
215.187	148.47			716.7	21.28	247.77	23.04	575.93	32.09
215.227	141			716.93	20.78	247.77	23.82	577	32.66
215.227	148.7			717.27	20.43	247.83	23.72	577.18	33.24
215.386	148.89			717.5	20.5	247.89	23.97	577.57	32.52
215.426	135			717.73	20.71	247.95	23.8	577.96	31.04
215.426	141.3			717.96	20.78	247.95	24.51	578.35	31.56
215.585	113.2			718.18	20.33	248.01	25.62	578.74	32.52
215.625	97.7			718.52	20.12	248.07	26.08	579.13	33.51
215.625	140			718.75	20.58	248.13	24.18	579.52	33.13
215.784	139.24			718.97	20.8	248.19	23.34	579.91	33.06
215.824	126			719.19	20.92	248.19	22.92	580.3	32.1
215.824	126.3			719.42	18.71	248.26	25.02	580.69	30.22
215.984	134.96			719.64	18.71	248.32	25.46	581.08	26.48
216.023	99.3			719.87	18.74	248.38	25.58	581.47	25.6
216.023	132			720.09	20.93	248.38	26.07	581.86	25.93
216.183	135.59			720.31	22.42	248.44	26.26	582.25	28.11
216.223	131			720.53	21	248.5	26.75	582.64	28.95
216.223	131.3			720.76	19.65	248.56	26.14	583.03	28.1
216.382	142.62			720.98	19.82	248.56	25.61	583.42	27.49
216.422	130			721.2	22.56	248.62	22.81	583.81	28.69
216.422	137.7			721.42	25.39	248.68	22.3	584.19	29.84
216.581	139.66			721.53	26.2	248.74	22.25	584.58	31.17
216.621	127			721.75	27.53	248.8	25.65	584.97	30.29
216.621	131			721.97	30.21	248.8	27.01	585.17	29.53
216.78	40.3			722.19	27.66	248.86	28.51	585.95	28.82
216.78	132.69			722.41	25.6	248.92	28.17	586.34	28.46
216.82	138			722.52	21.08	248.98	28.64	586.73	28.5
217.22	114			722.74	21.32	248.98	27.91	587.12	27.98
217.22	121.42			722.96	20.92	249.04	27.55	587.51	27.94
217.381	129.3			723.61	21.39	249.16	26.98	587.9	27.83
218.022	117			723.72	21.77	249.22	27.14	588.29	25.35
218.022	125.75			723.94	21.19	249.28	26.57	588.68	25.21
218.182	124.7			724.04	20	249.34	26.08	589.07	25.68
218.823	153.18			724.26	18.29	249.34	25.2	589.46	28.04
218.823	153.7			724.48	17.99	249.4	25.01	589.85	27.01
218.983	112			724.58	18.08	249.46	24.61	590.24	26.42
219.624	191.21			724.58	18.17	249.52	25.02	590.63	26.17
219.624	196			724.8	18.28	249.52	25.09	591.02	26.44
219.785	51			724.91	16.65	249.58	25.22	591.41	25.87
219.785	94			725.12	17.14	249.64	25.11	591.79	26.47
220.425	161.3			725.23	17.3	249.71	24.23	592.18	25.75
220.425	179.24			725.34	19.28	249.77	21.23	592.57	25.34
220.586	174.7			725.55	19.52	249.77	20.01	592.96	23.95
221.227	141			725.66	19.83	249.83	20.24	593.35	23.41
221.227	172.88			725.87	19.8	249.89	21.9	593.74	22.81
221.387	214			725.98	19.77	249.95	21.68	594.13	20.01
222.028	140.3			726.19	18.93	250.01	22.09	594.52	20.12
222.028	147.61			726.3	18.63	250.01	20.56	594.91	19.9
222.188	751			726.4	16.86	250.07	21.87	595.3	22.23
222.829	157			726.62	17.66	250.13	22.13	595.69	22.48
222.829	163.65			726.72	18.32	250.19	24.98	596.08	23.71
222.989	182.3			726.83	20.5	250.25	25.05	596.47	24.42
223.493	175			726.94	21.49	250.25	25.07	596.86	23.29
223.493	193.68			727.15	20.05	250.31	24.38	597.25	23.33
223.584	159			727.25	20.92	250.37	24.14	597.64	23.58
223.949	176			727.36	20.06	250.43	24.74	598.03	25.94
223.949	195.72			727.46	20.77	250.49	25.26	598.42	25.14
224.04	187.3			727.67	18.43	250.49	25.6	598.81	24.83
224.405	169			727.78	17.19	250.55	24.28	599.2	24.6
224.405	186.06			727.89	16.41	250.61	24.37	599.59	22.76
224.496	192			727.99	16.73	250.67	21.38	599.78	23.52
224.861	160			728.1	16.61	250.73	19.63	600.56	26.01
224.861	177.09			728.31	17.2	250.79	19.19	600.95	30.55
224.952	176.3			728.41	17.42	250.79	21.27	601.34	31.16
225.317	166.83			728.51	17.12	250.85	24.24	601.73	30.18
225.317	175			728.62	16.23	250.91	24.67	602.12	29.72
225.409	170			728.62	14.14	250.97	24.88	602.51	30.82
225.774	44.3			728.93	13.18	251.03	24.12	602.9	30.23
225.774	105.16			729.04	14.27	251.09	21.51	603.29	28.97
225.774	159.7			729.14	14.41	251.15	20.21	603.68	27.24
225.865	166			729.24	15.98	251.15	20.72	604.07	25.49
226.23	167			729.35	16.04	251.21	22.83	604.46	25.52
226.23	168			729.45	18.54	251.27	24.47	604.85	24.92
226.321	162.7			729.56	18.57	251.33	25.39	605.24	25.4
226.686	168.3			729.66	18.14	251.39	25.9	605.63	27.7
226.686	170.3			729.76	17.7	251.45	27.14	606.02	30.5
226.778	172.7			729.87	17.7	251.45	25.95	606.41	33.65
227.143	139.7			734.74	19.09	251.51	26.21	606.8	32.28
227.143	147.7			734.74	20	251.57	25.93	607.19	32.88
227.234	149.7			734.84	20.08	251.63	24.06	607.58	30.79
227.599	138.3			734.94	21.02	251.69	24.62	607.97	31.67
227.599	145.7			734.94	21.57	251.75	24.4	608.36	30.38
227.69	146.7			735.04	19.58	251.75	27.83	608.75	32.1
228.055	151.7			735.04	21.15	251.81	28.45	609.14	33.5
228.055	158			735.14	20.5	251.87	28.85	609.53	34.12
228.146	156.3			735.24	23.29	251.93	28.56	609.92	33.74
228.511	155			735.24	23.56	251.99	28.54	610.31	33.6
228.511	156.3			735.34	23.41	252.05	29.63	610.7	34.83
228.602	157.7			735.34	22.54	252.11	29.58	611.09	36
228.968	149			735.44	22.01	252.11	30.04	611.48	34.98
228.968	152			735.44	22.42	252.17	30.07	611.87	34.51
229.059	153			735.54	22.85	252.23	29.91	612.26	34.98
229.424	145.3			735.64	22.47	252.28	29.3	612.65	34.05
229.424	149.7			735.64	22.46	252.34	29.33	613.04	35.46
229.515	151.7			735.74	21.4	252.4	30.12	613.43	34.91
229.88	118.3			735.74	20.69	252.4	27.87	615	36.71
229.88	128.7			735.83	19.73	252.46	27.68	615	33.99
229.927	124			735.93	19.79	252.52	28.29	615.7	32.66
230.115	123			735.93	20.41	252.58	32.42	616.4	32.08
230.115	131			736.03	21.42	252.64	32.57	617.1	30.94
230.162	120.7			736.03	21.2	252.7	32.38	617.8	29.12
230.35	77.7			736.13	21.32	252.76	30.29	618.5	26.01
230.35	117.7			736.13	19.14	252.88	28.65	619.2	22.53
230.397	65			736.23	17.52	252.94	27.07	619.9	19.23
230.585	63.3			736.33	17.07	253	26.7	620.6	16.53
230.585	64.7			736.33	17.94	253	27.2	621.3	15.71
230.632	67			736.43	19.45	253.06	27.04	622	14.74
230.82	58.7			736.43	18.47	253.12	27.09	622.7	14.16
230.82	73			736.52	18.26	253.18	24.45	623.39	13.38
230.867	78.7			736.62	18.28	253.24	25	624.09	13.09
231.055	52.3			736.62	19.36	253.3	24.95	624.79	12.71
231.055	85.3			736.72	20.36	253.36	26.94	625.49	12.56
231.102	91			736.72	20	253.42	26.43	626.19	13.33
231.29	55.7			736.82	18.85	253.42	26.13	626.89	12.89
231.29	107.7			736.92	20.18	253.48	26.08	628.29	13.21
231.337	131.7			737.01	21.3	253.54	23.85	628.99	12.74
231.525	42			737.01	21.49	253.6	24.12	629.69	13.55
231.525	64.7			737.11	20.74	253.66	24.92	630.39	13.06
231.525	136			737.11	21.81	253.72	27.9	631.09	13.15
231.572	134.3			737.21	23.14	253.77	28.12	631.79	12.82
231.76	122			737.31	22.8	253.83	27.6	632.49	11.81
231.76	133			737.31	21.37	253.89	26.5	633.19	9.98
231.807	132.3			737.41	19.23	253.89	26.34	633.88	10.37
231.995	133.3			737.5	18.54	253.95	26.05	634.58	11.85
231.995	143.7			737.5	15.97	254.01	26.9	635.28	13.08
232.042	128.7			737.6	16.9	254.07	27.21	635.98	10.85
232.23	130.3			737.6	14.71	254.13	28.12	636.68	10.42
232.23	144.3			737.7	15.81	254.19	28.48	637.38	8.89
232.277	126			737.79	15.38	254.25	28.78	638.08	10.68
232.464	122.3			737.79	17.42	254.31	25.92	638.78	10.98
232.464	126			737.89	18.31	254.37	25.83	639.13	13.04
232.511	39			737.99	16.77	254.43	24.57	640.53	12.84
232.511	77			737.99	17.53	254.43	26.45	641.23	12.89
232.699	118			738.09	18.22	254.49	25.46	641.93	11.07
232.699	123.3			738.18	22.72	254.55	25.28	642.63	11.49
232.746	109.7			738.18	24.41	254.61	23.16	643.33	9.9
232.934	98.3			738.28	28.34	254.67	22.38	644.02	11.6
232.934	120			738.38	32.67	254.84	21.99	644.72	11.45
232.981	94			738.38	34.18	254.9	23.7	645.42	13.21
233.169	90.3			738.47	33.67	254.96	23.56	646.12	12.99
233.169	102.7			738.57	30.44	255.02	20.32	646.82	12.9
233.216	71.7			738.57	29.18	255.08	19.24	647.52	12.72
233.404	78.7			738.67	28	255.14	17.69	648.22	12.79
233.404	83			738.76	27.69	255.2	19.37	648.92	12.98
233.451	69.3			738.86	28.54	255.26	18.17	649.62	13.44
233.639	69.3			738.86	29.73	255.32	18.73	650.32	14.3
233.639	71.3			738.96	31.06	255.38	17.75	651.02	14.8
233.686	73.3			739.05	32.74	255.43	19.31	651.72	16.02
233.874	66			739.15	32.95	255.49	20.06	653.81	17.53
233.874	70.7			739.15	34.07	255.49	22.08	654.51	18.99
233.921	73.7			739.25	33.82	255.55	21.96	655.21	19.01
234.109	64.3			739.34	35.82	255.61	22.13	655.91	17.58
234.109	73.3			739.44	35.99	255.67	22.1	656.61	16.63
234.156	77			739.53	34.09	255.73	22.41	657.31	16.4
234.344	65			739.53	32.15	255.79	22.22	658.01	16.37
234.344	75			739.63	29.96	255.85	22.2	658.71	16.6
234.391	82			739.73	29.12	255.91	21.91	659.41	16.85
234.579	79.3			739.82	28.1	255.97	21.92	660.11	18.03
234.579	82.7			739.92	26.74	256.03	21.67	660.81	19.24
234.626	96.7			739.92	26.94	256.08	21.17	661.51	20.23
234.814	34.28			740.01	26.42	256.14	20.71	662.21	21.2
234.814	58.7			740.11	26.37	256.2	20.44	662.91	20.91
234.814	81.7			740.2	26.78	256.26	20.36	663.6	18.12
234.861	102.7			740.3	26.69	256.32	20.35	664.3	15.69
235.049	91.96			740.3	26.43	256.38	20.37	665	13.61
235.049	95.3			740.39	24.81	256.44	20.18	687.21	16.14
235.096	115.3			740.49	23.63	256.5	19.82	687.91	18.38
235.284	104.7			740.58	22.85	256.56	19.36	688.6	20.23
235.284	104.94			740.68	22.4	256.62	19.25	690	20.04
235.331	118.3			740.78	21.64	256.67	19.17	690	18.7
235.519	104			740.78	20.97	256.73	16.76	690.45	18.54
235.519	116.22			740.87	20.69	256.73	16.8	690.89	17.55
235.566	126.7			740.97	20.42	256.79	16.65	691.33	16.69
235.754	95.7			741.06	20.4	256.85	20.27	691.78	15.18
235.754	117.2			741.15	20.51	256.97	21.13	692.22	15.29
235.801	126.3			741.25	20.07	257.03	22.23	692.66	15.16
235.989	104			741.34	19.83	257.09	21.27	693.11	14.27
235.989	125.59			741.44	19.36	257.15	21.01	693.55	13.3
236.036	132.3			741.53	19.22	257.2	20.99	694	13.12
236.224	117			741.63	19.71	257.26	21.63	694.44	13.82
236.224	127.87			741.63	20.1	257.32	21.84	694.88	12.45
236.271	136.7			741.72	20.52	257.38	21.95	695.33	12.62
236.459	121.7			741.82	19.92	257.44	21.77	695.77	12.85
236.459	132.85			741.91	19.61	257.5	21.5	696.22	14.53
236.506	136.3			742	19.13	257.56	20.66	696.66	14.91
236.694	124.7			742.1	18.49	257.62	18.52	697.1	15.49
236.694	134.13			742.19	17.59	257.67	19.32	697.55	15.92
236.741	138			742.29	17.39	257.73	20.55	697.99	16.16
236.929	129.7			742.47	17.91	257.79	23.41	698.44	17.05
236.929	141.81			742.57	18.01	257.85	23.8	698.88	18.08
236.976	127.3			742.66	17.9	257.91	24.08	699.32	18.76
237.164	137.3			742.76	17.68	257.97	24.26	699.77	18.62
237.164	139.79			742.85	17.68	258.03	23.61	700.21	17.22
237.211	121.3			742.94	17.46	258.09	22.97	700.65	16.74
237.399	127			743.04	17.05	258.14	22.66	701.1	16.52
237.399	137.46			743.13	15.64	258.2	22.45	701.54	17.39
237.446	87			743.22	15.5	258.26	22.25	701.65	17.96
237.633	124.3			743.32	15.47	258.32	21.68	702.54	18.33
237.633	126.04			743.41	16.76	258.38	21.73	702.99	17.5
237.68	47.7			743.5	16.29	258.44	21.47	703.43	17.09
237.868	107.7			743.6	15.84	258.5	21.34	703.87	15.38
237.868	121.71			743.69	15.48	258.56	20.96	704.32	15.96
237.915	48.3			743.87	16.38	258.61	20.48	704.76	16.07
238.103	80			743.97	16.86	258.67	20.23	705.2	17.37
238.103	82.68			744.06	17.27	258.73	19.55	705.65	17.39
238.15	72.3			744.15	16.96	258.79	19.43	706.09	17.05
238.338	69.7			744.24	16.79	258.85	19.12	706.54	17.02
238.338	77.94			744.34	16.64	258.91	18.84	706.98	17.8
238.385	86.3			744.43	16.72	258.97	16.59	707.42	18.9
238.573	22.7			744.61	15.01	259.02	16.97	707.87	20.53
238.573	66.61			744.71	15.32	259.08	17.46	708.31	21.38
238.62	126.3			744.8	15.69	259.2	19.87	708.76	22.01
238.808	55			744.89	16.21	259.26	19.68	709.2	22.56
238.808	71.28			744.98	14.78	259.32	20.24	709.64	23.6
238.855	122			745.17	14.84	259.38	20.54	710.09	24.22
239.043	68.3			745.26	17.17	259.43	20.27	710.53	24.5
239.043	77.55			745.35	18.84	259.49	19.6	710.98	23.8
239.09	128.3			745.44	19.14	259.55	18.73	711.42	23.43
239.278	101.3			745.63	18.44	259.61	18.72	711.86	21.77
239.278	104.22			745.72	18.24	259.67	18.68	712.31	20.07
239.325	134			745.81	17.97	259.73	18.93	712.75	17.75
239.513	130			745.9	18.06	259.84	18.81	713.19	16.24
239.513	133.49			746.08	17.34	259.9	18.77	713.64	14.54
239.56	33.02			746.45	18.2	259.96	18.69	714.08	13.77
239.56	66.7			746.63	19.02	260.02	17.01	714.53	13.02
239.748	124.16			746.72	20.7	260.02	17.88	714.97	13.41
239.748	146.3			746.81	20.89	262.35	17.17	715.41	13.85
239.795	107.04			746.99	21.68	262.4	20.27	715.86	14.05
239.983	127.7			747.08	22.25	262.46	20.05	716.3	13.85
239.983	127.72			747.17	22.92	262.52	21.69	716.75	13.36
240.03	114.06			747.36	23.22	262.58	20.64	717.19	12.84
240.412	128.39			747.45	21.54	262.69	20.56	717.63	12.43
240.412	132			747.63	22.24	262.75	20.32	718.08	11.52
240.507	114.38			747.72	22.8	262.81	21.72	718.3	10.12
240.889	116.35			747.9	24.94	262.87	22.76	719.19	9.78
240.889	116.7			747.99	24.79	262.93	23.28	719.63	10.01
240.985	111.1			748.08	24.43	262.98	23.01	720.08	11.06
241.367	110			748.26	24.91	263.1	21.23	720.52	11.28
241.367	112.32			748.35	22.25	263.16	21.05	720.96	11.02
241.463	115.11			748.53	22.09	263.22	20.63	721.41	11.6
241.845	109.3			748.62	21.48	263.27	21.98	721.85	11.61
241.845	113.28			748.8	23.87	263.33	22.21	722.29	12.03
241.94	108.83			748.89	24.34	263.39	19.85	722.74	12.08
242.322	112			749.07	24.78	263.51	19.53	723.18	12.6
242.322	118.94			749.24	24.21	263.56	19.23	723.63	12.61
242.417	135.85			749.33	23.59	263.62	21.08	724.07	12.83
242.799	112.51			749.51	23.5	263.68	20.85	724.51	12.22
242.799	118.3			749.6	24.37	263.74	20.64	724.96	12.21
242.895	128.17			749.78	24.05	263.85	20.99	725.4	11.97
243.277	115			749.87	23.28	263.91	21.19	725.85	12.73
243.277	115.47			750.05	22.44	263.97	21.24	726.29	13.16
243.373	101.19			750.22	22.88	264.03	19.16	726.73	12.86
243.755	41			750.31	23.55	264.08	17.32	727.18	12.52
243.755	59.14			750.49	24.4	264.2	17.69	727.62	12.3
243.755	123.7			750.67	25.81	264.26	19.64	728.07	12.85
243.85	100.21			750.76	27.14	264.32	22.18	728.51	12.23
244.232	117.3			750.93	28.1	264.37	22.61	728.95	12.47
244.232	126.3			751.11	28.04	264.43	23.51	729.4	12.48
244.327	104.24			751.2	28.53	264.55	23.97	729.84	13.18
244.709	119.7			751.29	28.77	264.72	23.82	730.28	13.39
244.709	137.3			751.55	27.36	264.84	23.73	730.73	13.27
244.805	100.27			751.73	27.27	264.89	23.1	731.17	13.62
245.187	107.3			751.9	26.57	264.95	23.64	731.62	12.98
245.187	133.3			752.08	26.87	265.01	23.89	732.06	12.26
245.282	127.29			752.17	24.49	265.07	24.21	732.5	10.77
245.665	106.3			752.34	23.02	265.18	23.98	732.95	9.43
245.665	113			752.52	22.69	265.24	21.97	733.39	9.12
245.76	116.32			752.69	24.13	265.3	21.7	733.84	9.41
246.136	104.7			752.87	25.25	265.35	22.14	734.28	10.47
246.136	106			752.95	25.96	265.47	21.53	734.72	10.84
246.23	104.06			753.13	26.78	265.53	21.42	734.95	11.97
246.607	93.7			753.3	27.76	265.59	20.55	735.83	13.03
246.607	103.7			753.48	28.75	265.64	22.95	736.28	13.91
246.701	102.39			753.65	28.79	265.76	20.52	736.72	14.09
247.077	99.3			753.82	28.43	265.82	20.59	737.17	14.09
247.077	126.3			754	27.6	265.87	20.56	737.61	13.91
247.171	98.12			754.09	27.44	265.99	23.36	738.05	13.44
247.548	122.3			754.26	27.39	266.05	23.53	738.5	13.09
247.548	133			754.43	28.3	266.1	23.65	738.94	13.44
247.642	95.45			754.61	29.21	266.16	22.77	739.38	12.36
248.018	114.7			754.78	30.79	266.28	22.12	739.83	12.54
248.018	124.3			754.95	31.12	266.33	21.14	740.27	12.62
248.112	93.48			755.12	31.22	266.39	18.61	740.72	13.42
248.489	102.3			755.3	31.14	266.45	16.42	741.16	13.3
248.489	112			755.47	30.69	266.56	16.17	741.6	13.13
248.583	106.81			755.64	27.48	266.62	18.9	742.05	14.27
248.959	102.7			755.81	27.07	266.68	22.16	742.49	14.61
248.959	103.3			755.99	25.95	266.79	23.46	742.94	14.65
249.053	110.54			756.16	28.43	266.85	23.51	743.38	14.16
249.429	99.7			756.33	23.61	266.91	22.93	743.82	13.36
249.429	100.7			756.5	22.85	267.02	22.64	744.27	13.38
249.524	105.88			756.67	19.47	267.08	22.93	744.71	13.71
249.9	98.3			756.84	20.57	267.14	23.22	745.16	15.26
249.9	103			757.02	19.63	267.2	23.01	745.6	16.16
249.994	89.31			757.27	19.44	267.48	22.96	746.04	16.79
250.37	97.3			757.44	20.33	267.54	23.46	746.49	16.44
250.37	101.3			757.53	20.24	267.66	23.51	746.93	16.31
250.464	87.65			763.37	20.87	267.71	23.27	747.37	15.7
250.841	106			763.63	20.67	267.77	22.15	747.82	16.16
250.935	89.98			763.79	21.3	267.89	21.92	748.26	16.71
251.311	35.7			764.05	19.52	267.94	21.89	748.71	17.57
251.405	103.72			764.22	19.48	268	21.34	749.15	18.21
251.782	101			764.47	19.3	268.12	21.28	749.59	18.22
251.876	111.06			764.64	20.97	268.17	21.38	750.04	18.3
252.252	90			764.89	20.81	268.23	22.33	750.48	17.43
252.346	93.49			765.06	20.34	268.34	21.72	750.93	18.89
252.723	87.7			765.31	19.69	268.4	18.92	752.48	19.5
252.817	104.83			765.56	18.73	268.46	18.31	752.92	20.74
253.193	89.3			765.73	16.09	268.57	19.15	753.37	19.12
253.287	19			765.98	16.32	268.63	21.25	753.81	18.86
253.287	19.7			766.15	14.35	268.69	21.39	754.26	16.13
253.287	39.56			766.4	16.86	268.8	21.91	754.7	14.97
253.664	99.7			766.66	16.45	268.86	22.8	755.14	14.53
253.758	41.7			766.83	18.65	268.98	22.86	755.59	16.3
253.758	85			767.08	17.97	269.03	22.56	756.03	17.73
254.134	109.3			767.33	16.79	269.09	22.16	756.47	18.62
254.228	93			767.5	15.26	269.2	21.57	756.92	19.6
254.228	97			767.75	16.3	269.26	20.93	757.36	19.53
254.604	105			768.01	18.38	269.32	21	757.81	19.2
254.699	69.3			768.26	20.24	269.43	21.26	758.25	18.98
254.699	90.3			768.43	20.16	269.49	21.13	758.69	19.53
255.075	67			768.68	20.22	269.61	21.33	759.14	19.15
255.169	82.3			768.94	20.01	269.66	21.77	759.58	19.06
255.169	91			769.19	19.6	269.72	19.32	760.03	16.98
255.545	103			769.36	19.27	269.83	18.33	760.47	17.02
255.639	105			769.61	18.9	269.89	17.93	760.91	17.25
255.639	127			769.87	19.69	270.01	20.45	761.36	19.83
256.016	82			770.38	18.38	270.06	21.49	761.8	21.47
256.11	125.7			770.63	18.72	270.12	21.23	762.25	22.88
256.11	144.7			770.8	17.98	270.23	21.77	762.69	24.22
256.486	90.7			771.06	19.97	270.41	21.98	763.13	25.65
256.58	84.7			771.31	20.08	270.52	23.06	763.58	24.54
256.58	137.7			771.57	20.17	270.58	22.21	764.02	26.4
256.957	99			771.83	20.26	270.69	22.9	764.46	27.98
257.051	123.7			772.08	20.92	270.75	23.03	764.91	30.74
257.051	133.7			772.34	21.52	270.81	24.12	765.35	30.98
257.427	106			772.6	21.14	270.92	23.64	765.8	30.36
257.521	27			772.85	21.84	270.98	23.01	766.24	29.63
257.521	72.3			773.11	21.03	271.09	21.95	766.68	27.63
257.521	145.7			773.37	24.7	271.15	19.47	767.13	27.06
257.898	118			773.63	28.99	271.26	20.24	767.57	27.31
257.992	63			773.89	34.57	271.32	21.62	768.02	27.53
257.992	118			774.15	36.32	271.43	23.84	768.24	29.79
257.992	137			774.16	22.07	271.49	22.99	769.13	31.1
258.368	127			774.44	20.21	271.55	21.87	769.57	32.05
258.462	78			774.73	22.62	271.66	21.17	770.01	28.71
258.462	120.7			775.01	24.76	271.72	21.02	770.46	25.28
258.462	135			775.3	25.07	271.83	21.13	770.9	22.44
258.838	118			775.59	24.87	271.89	21.06	771.12	21.01
258.933	72.3			775.88	24.07	272	20.27	780	15.37
258.933	94			776.17	23.87	272.06	21.13	780.03	16.57
258.933	121			776.46	22.93	272.18	21.36	780.67	15.29
259.309	159.7			776.76	21.84	272.23	22.41	781.3	13.16
259.403	66			777.05	21.27	272.35	20.95	781.94	11.33
259.403	98.3			777.34	21.29	272.4	20.48	782.58	12.47
259.403	128.3			777.64	21.88	272.52	20.29	783.21	14.43
259.779	120.3			777.94	21.27	272.57	21.43	783.85	14.69
259.873	41.7			778.24	19.69	272.69	22.01	784.49	14.63
259.873	74			778.54	16.92	272.75	21.59	785.13	13.63
259.873	116			778.69	17.78	272.86	21.8	785.76	12.5
260.25	118.3			779.29	18.51	272.92	22.42	786.4	11.32
260.344	32.3			779.6	19.02	273.03	22.82	787.04	10.58
260.344	85.3			779.91	18.49	273.09	22	787.67	10.09
260.344	121.7			780.22	19.47	273.2	19.56	788.31	10.31
260.72	130.3			780.52	21.32	273.26	17.9	788.95	10.5
260.814	105.3			780.83	21.09	273.54	18.34	789.59	11.3
[truncated: 12,473 more rows]
